# Supplementary material for: Thiazole–Chalcone Hybrids as Prospective Antitubercular and Antiproliferative Agents: Design, Synthesis, Biological, Molecular Docking Studies and In Silico ADME Evaluation
Source: MDPI journal article supplement (doi:10.3390/molecules26102847), 2021-05-11
Supplement: s1 [file s1]

# **Thiazole-Chalcone Hybrids as prospective antitubercular and antiproliferative agents: Design, synthesis, biological, molecular docking studies and in-silico ADME evaluation**

Ashok Babu Kasetti, Indrajeet Singhvi, Ravindra Nagasuri, Richie R. Bhandare and Afzal B. Shaik

## **FT-IR, $^1\text{H}$ NMR, $^{13}\text{C}$ NMR & Mass Spectra**

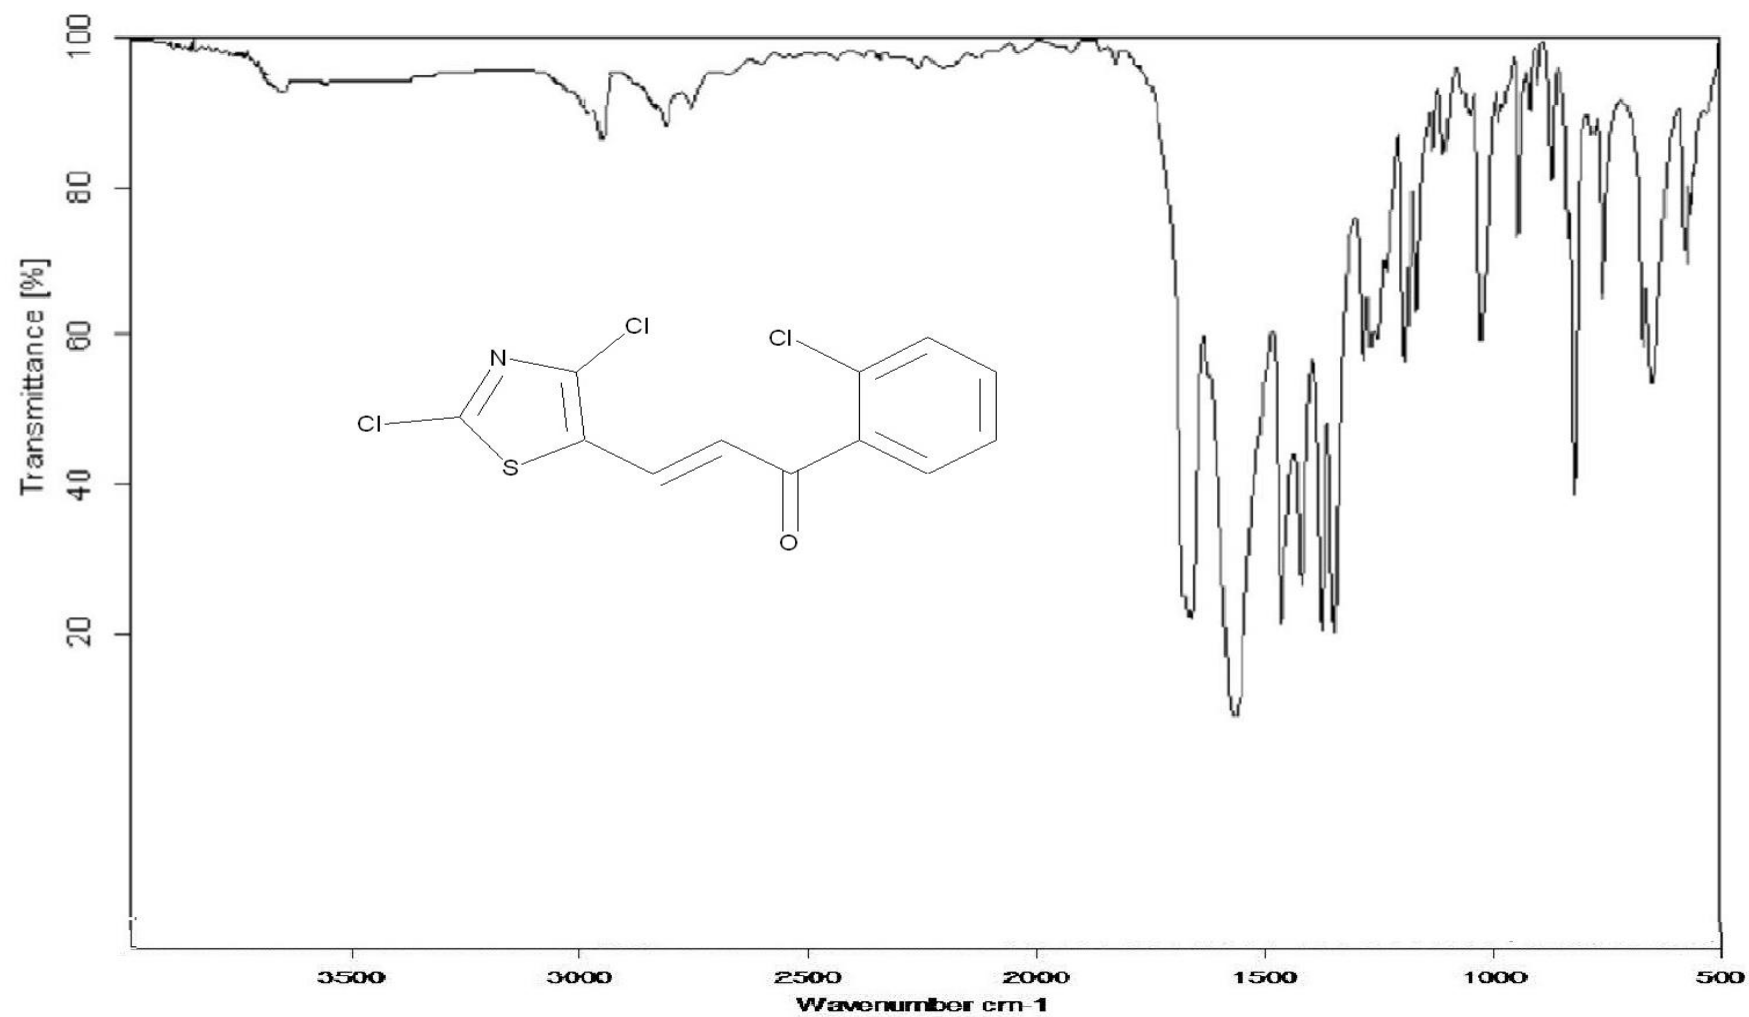

Figure S1. FT-IR Spectrum of compound 1

1 <sup>1</sup>H CDCl<sub>3</sub>

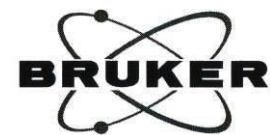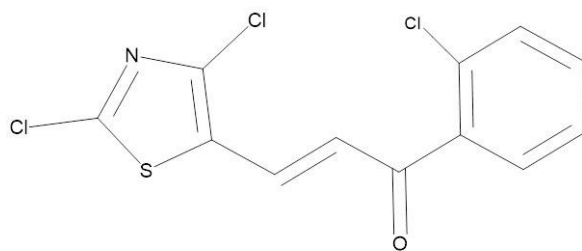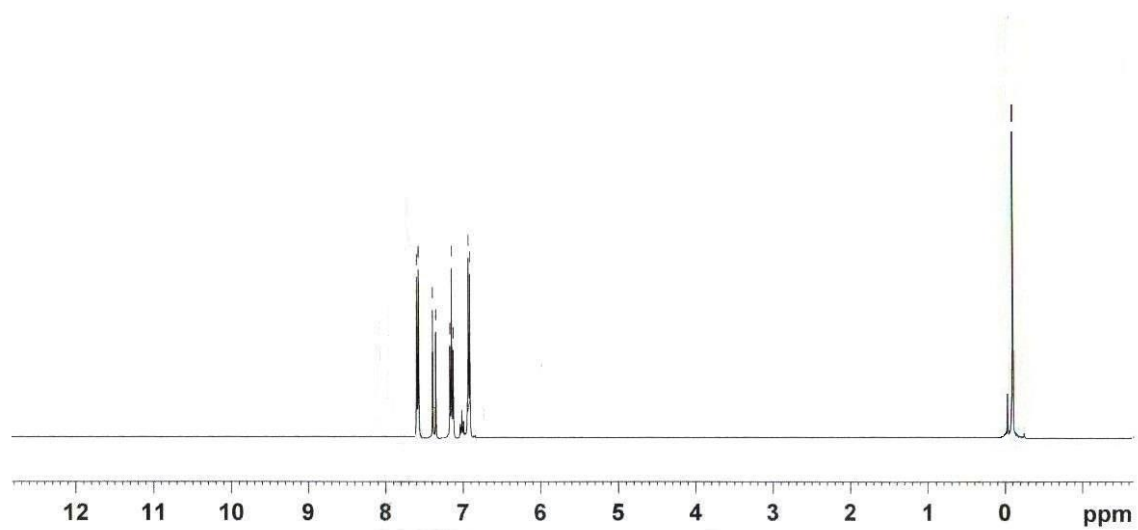

Figure S2. <sup>1</sup>H NMR Spectrum of compound 1

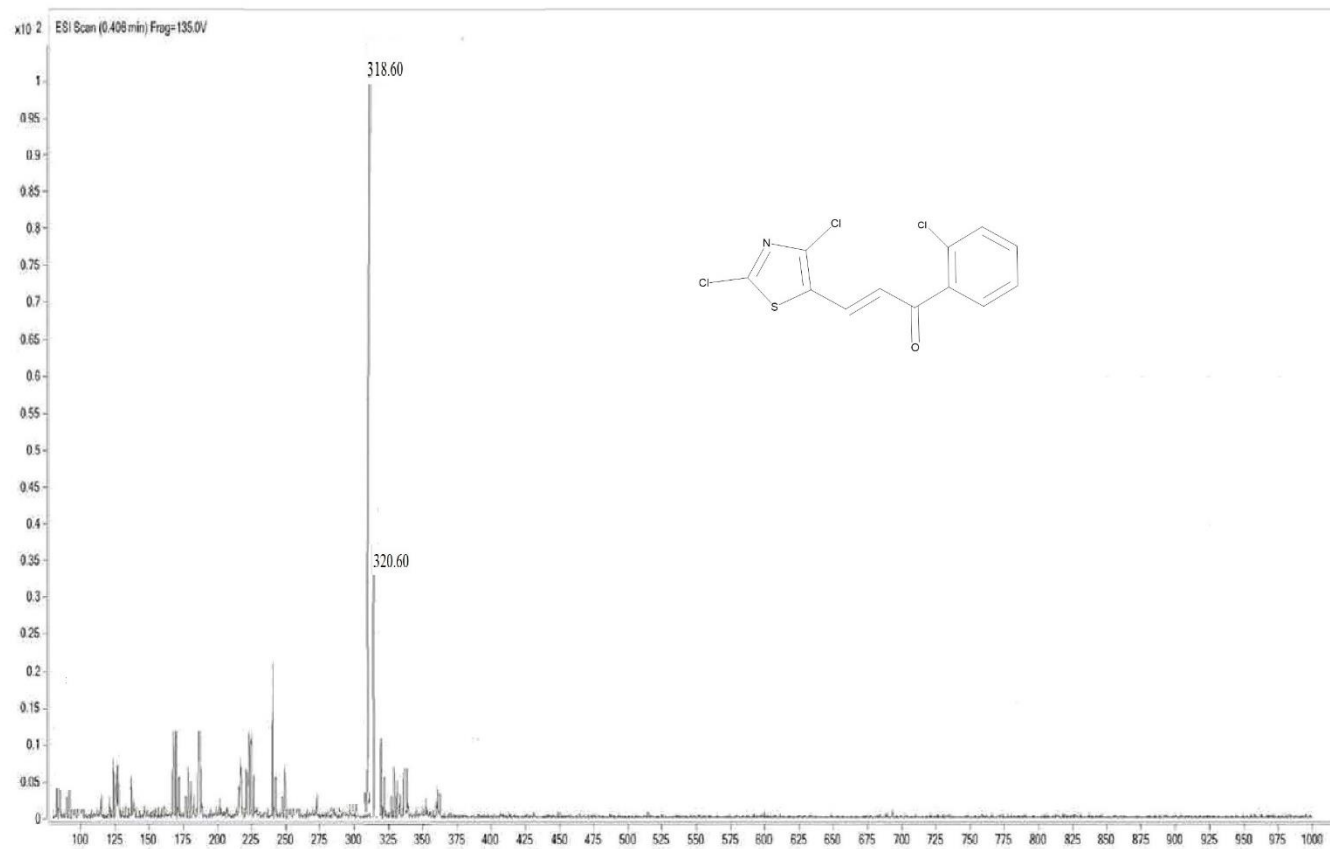

Figure S3. Mass Spectrum of compound 1

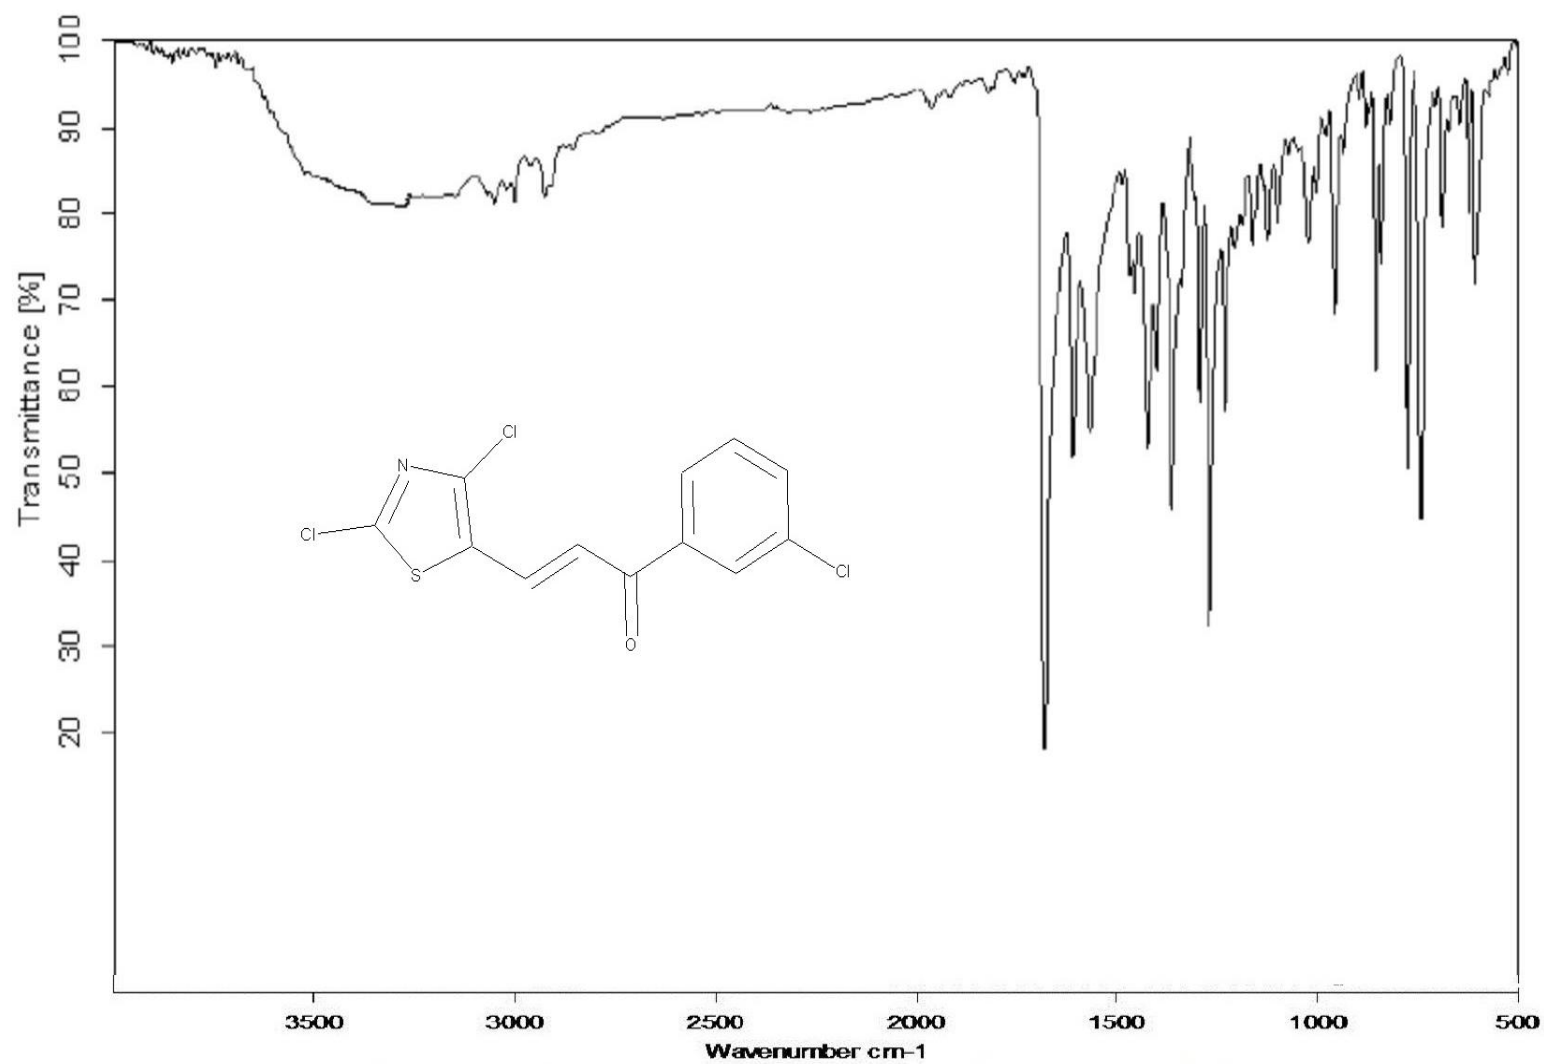

Figure S4. FT-IR Spectrum of compound 2

2 1H CDCl3

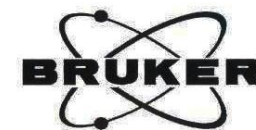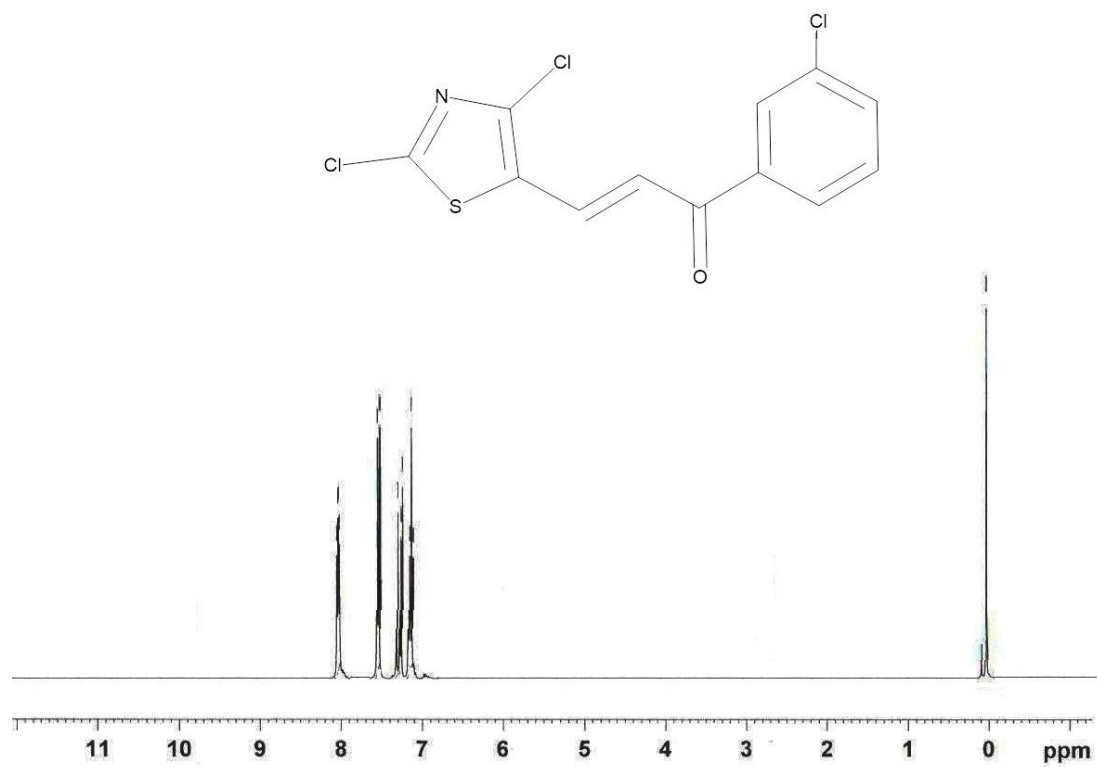

Figure S5. <sup>1</sup>H NMR Spectrum of compound 2

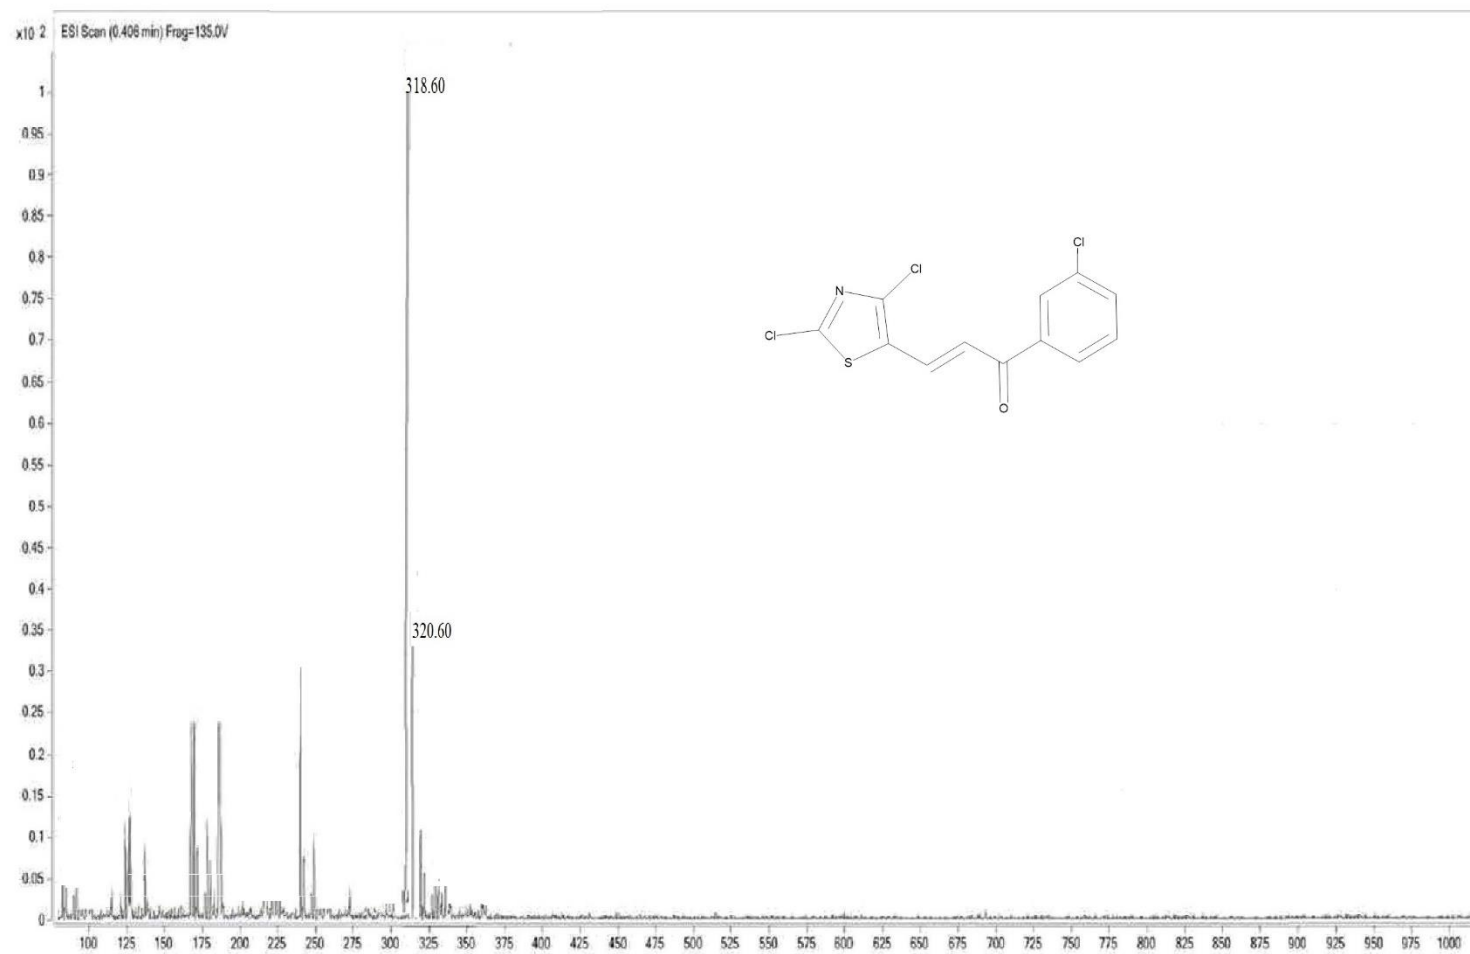

Figure S6. Mass Spectrum of compound 2

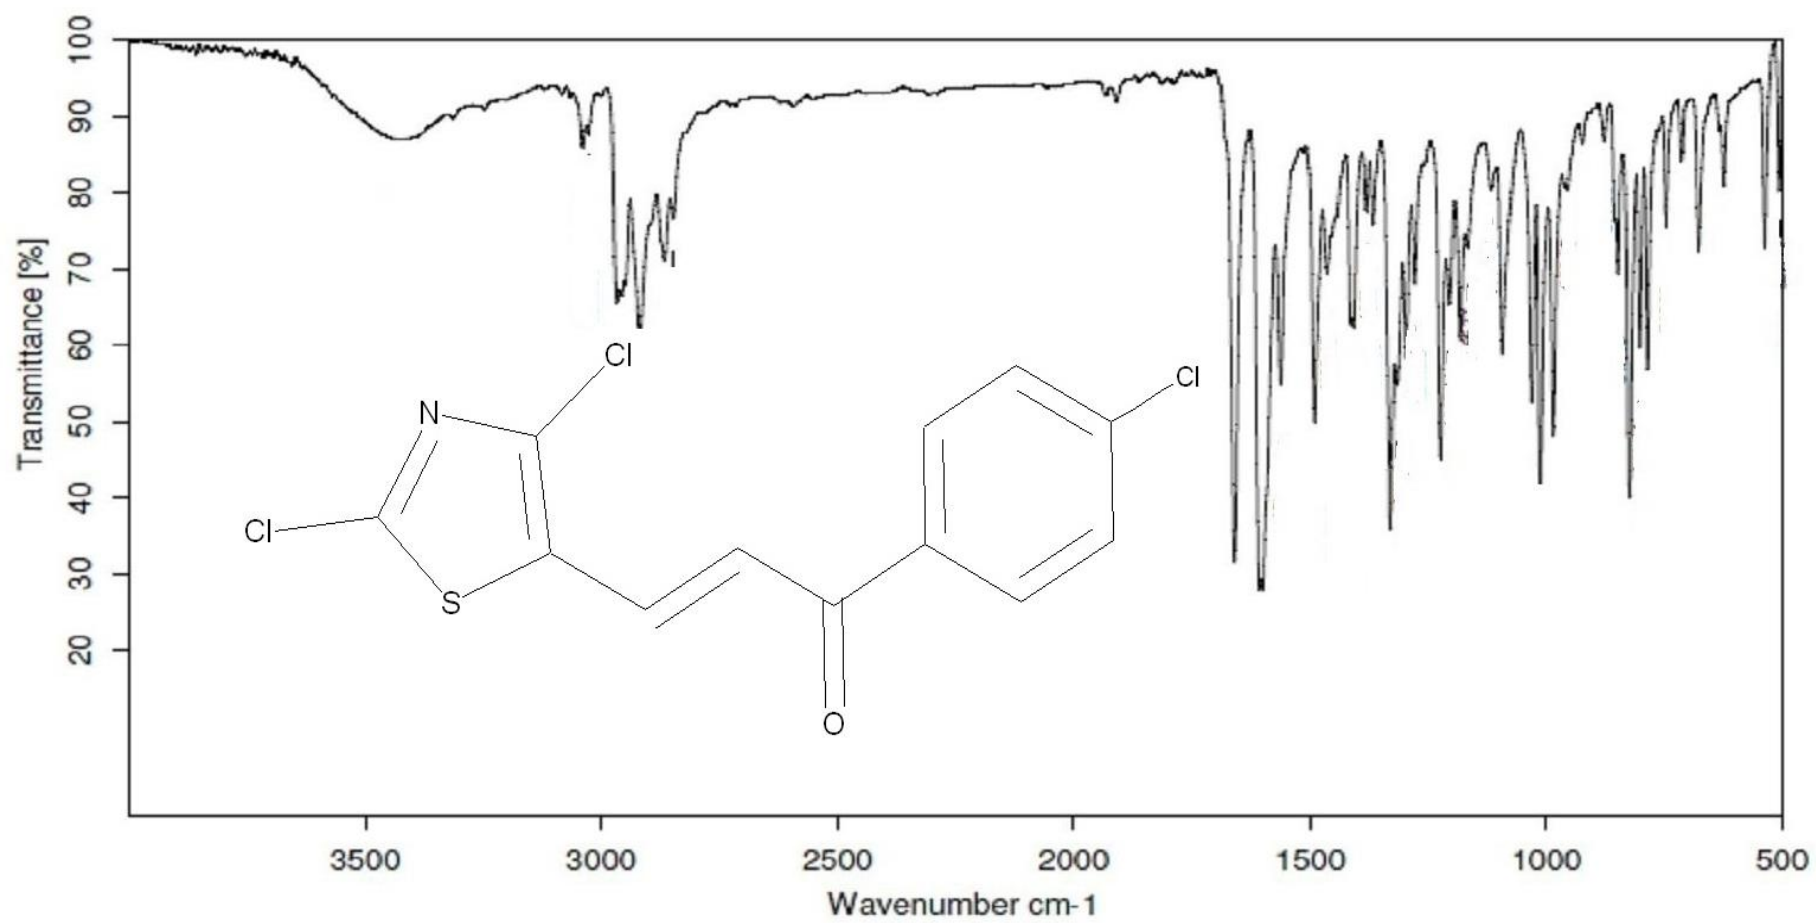

Figure S7. FT-IR Spectrum of compound 3



3  $^1\text{H}$   $\text{CDCl}_3$

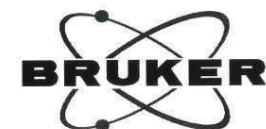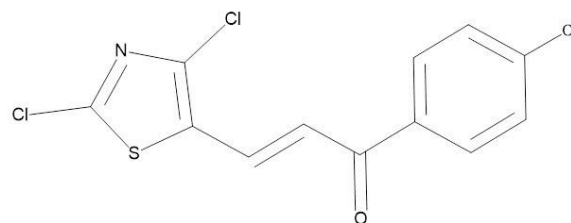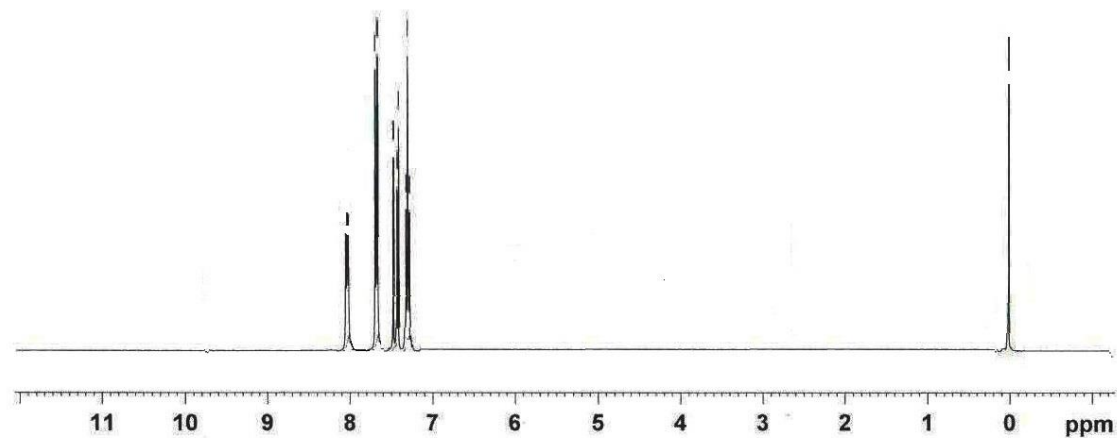

Figure S8.  $^1\text{H}$  NMR Spectrum of compound 3

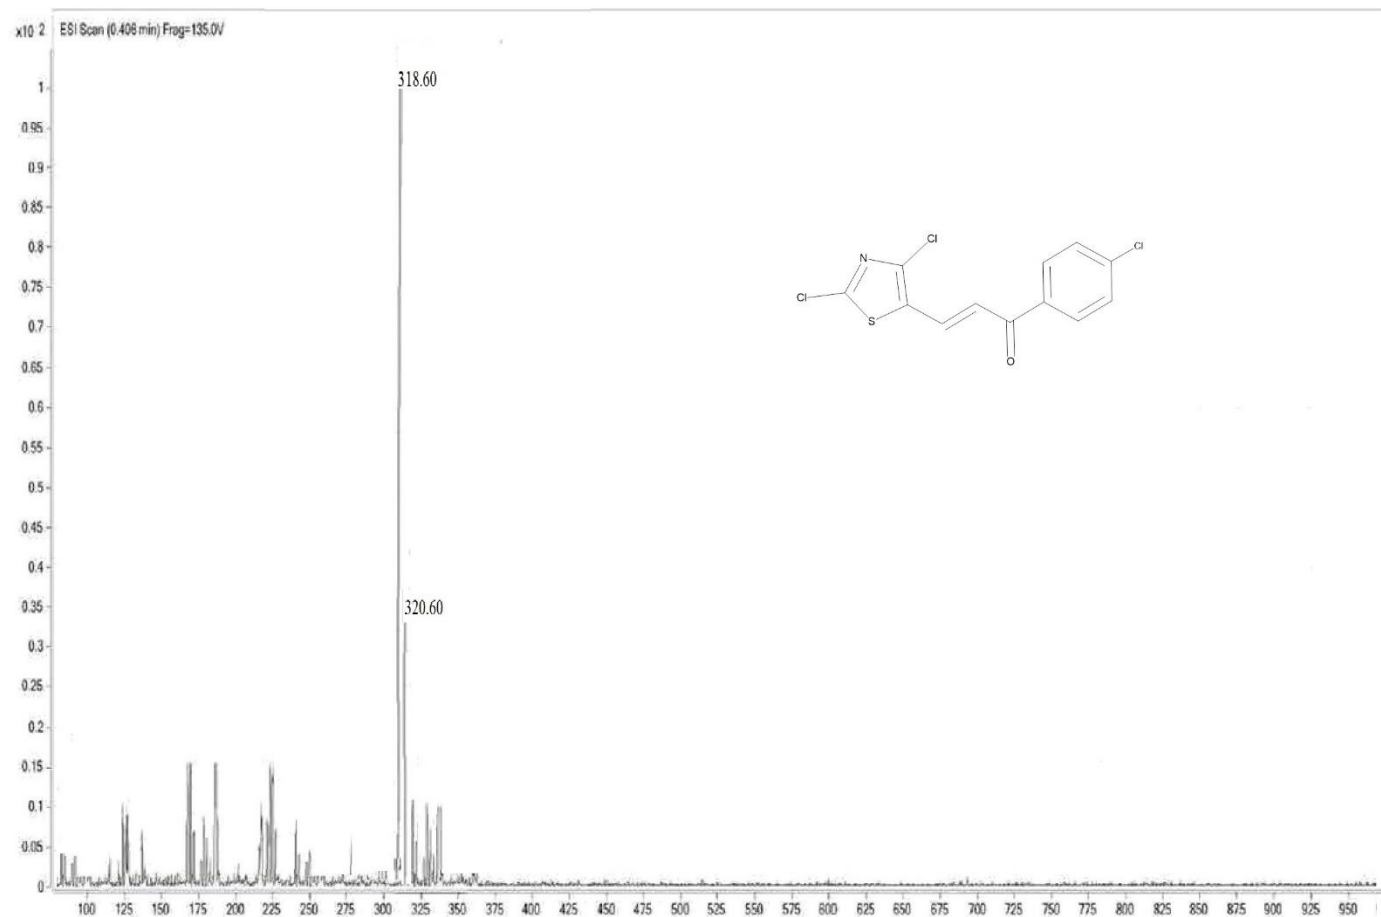

Figure S9. Mass Spectrum of compound 3

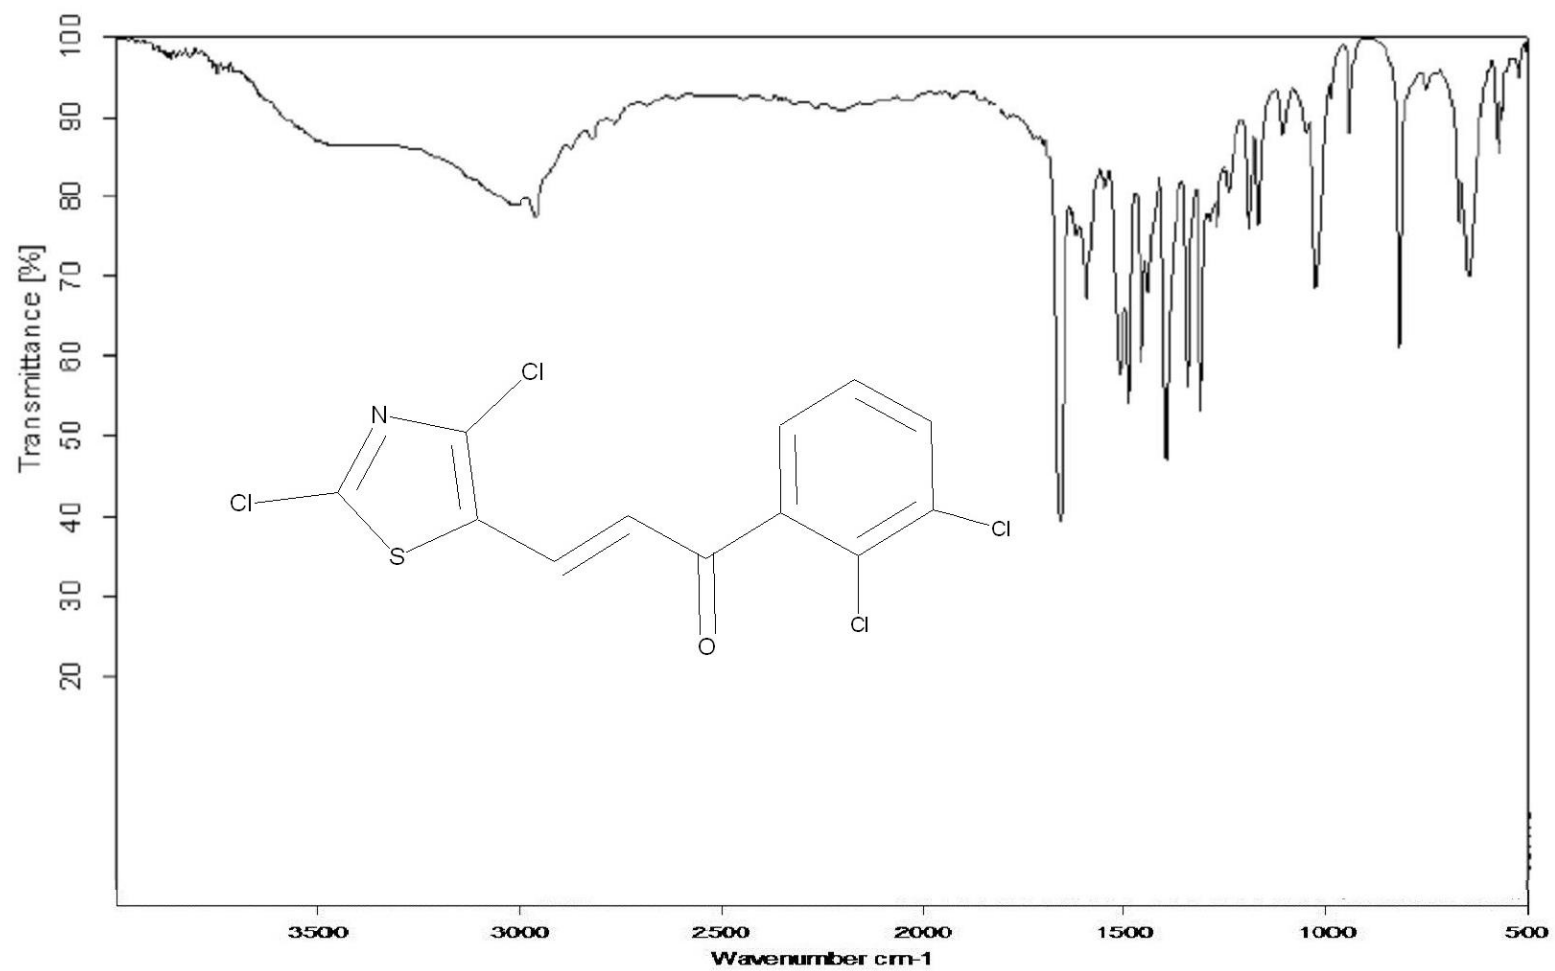

Figure S10. FT-IR Spectrum of compound 4

4 1H CDC13

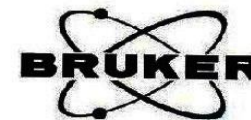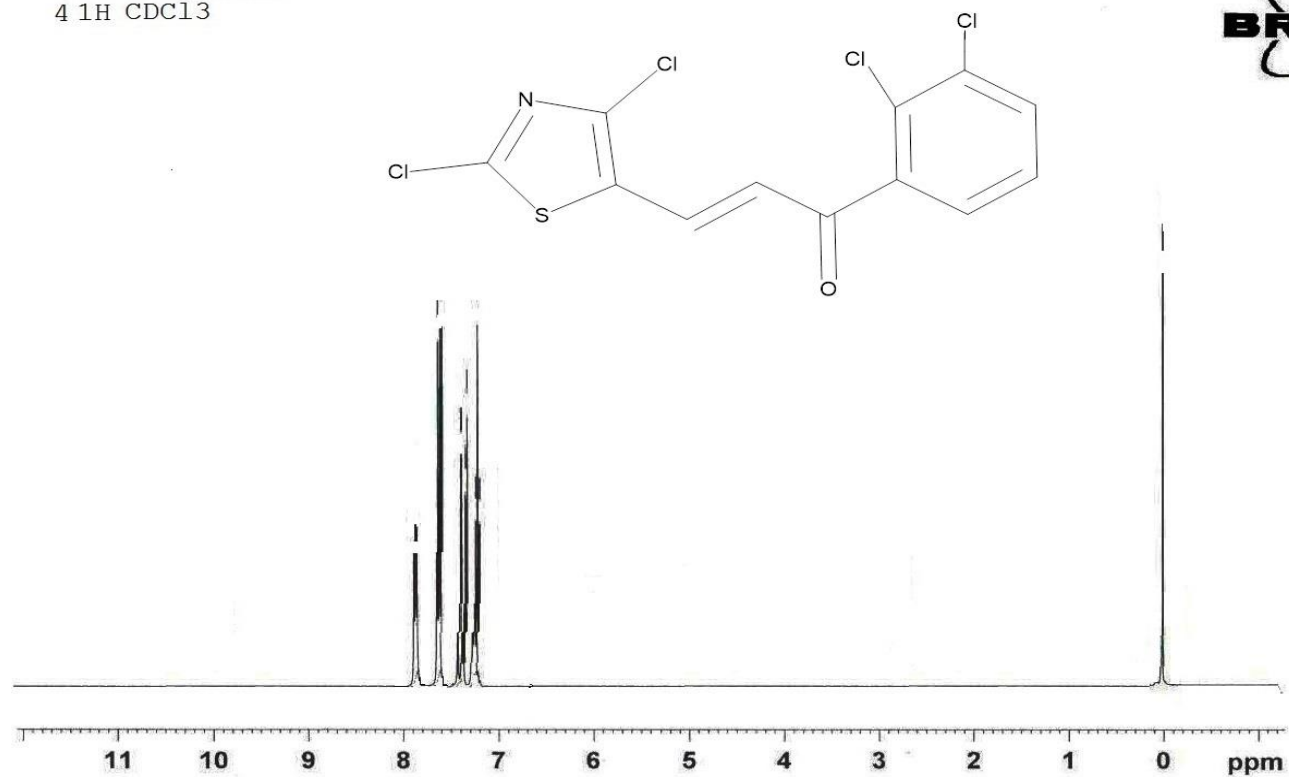

Figure S11. <sup>1</sup>H NMR Spectrum of compound 4

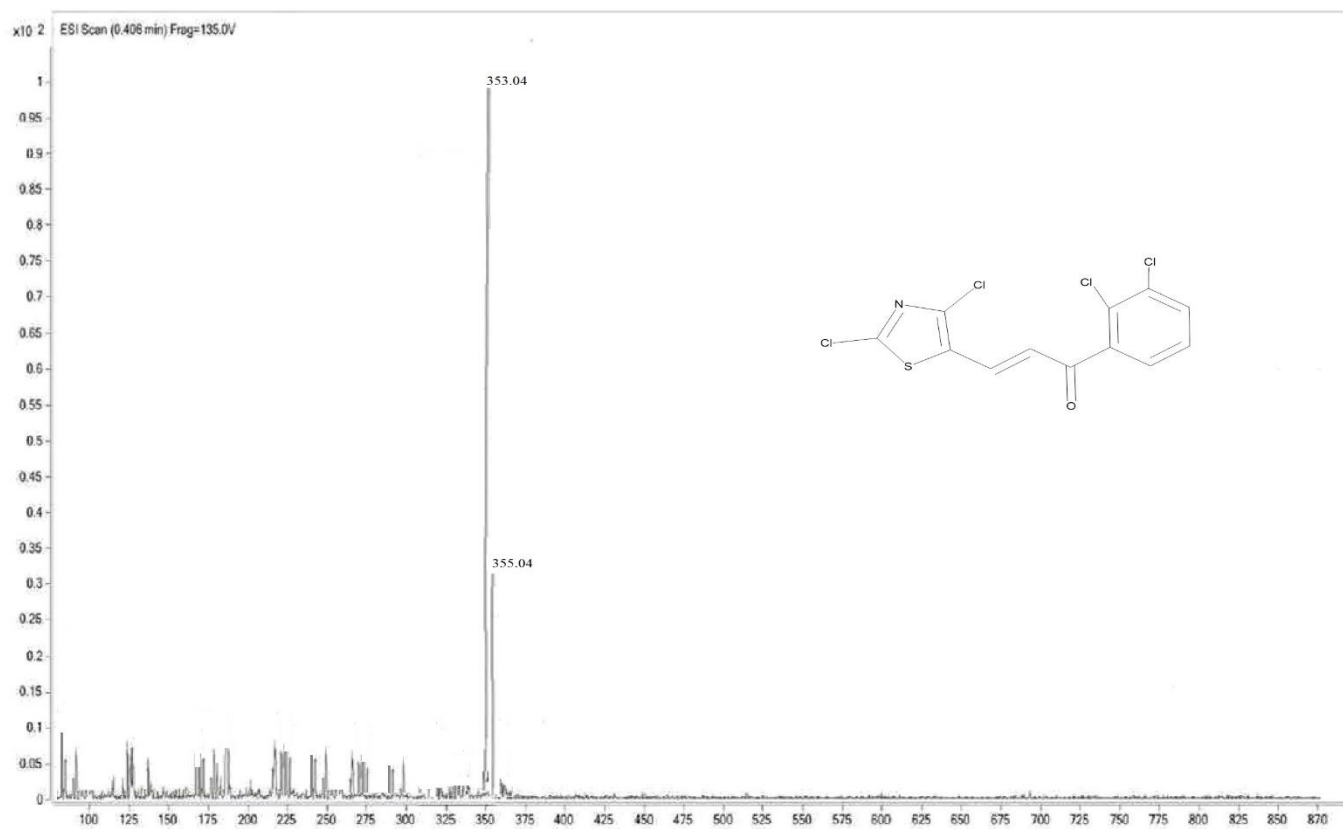

Figure S12. Mass Spectrum of compound 4

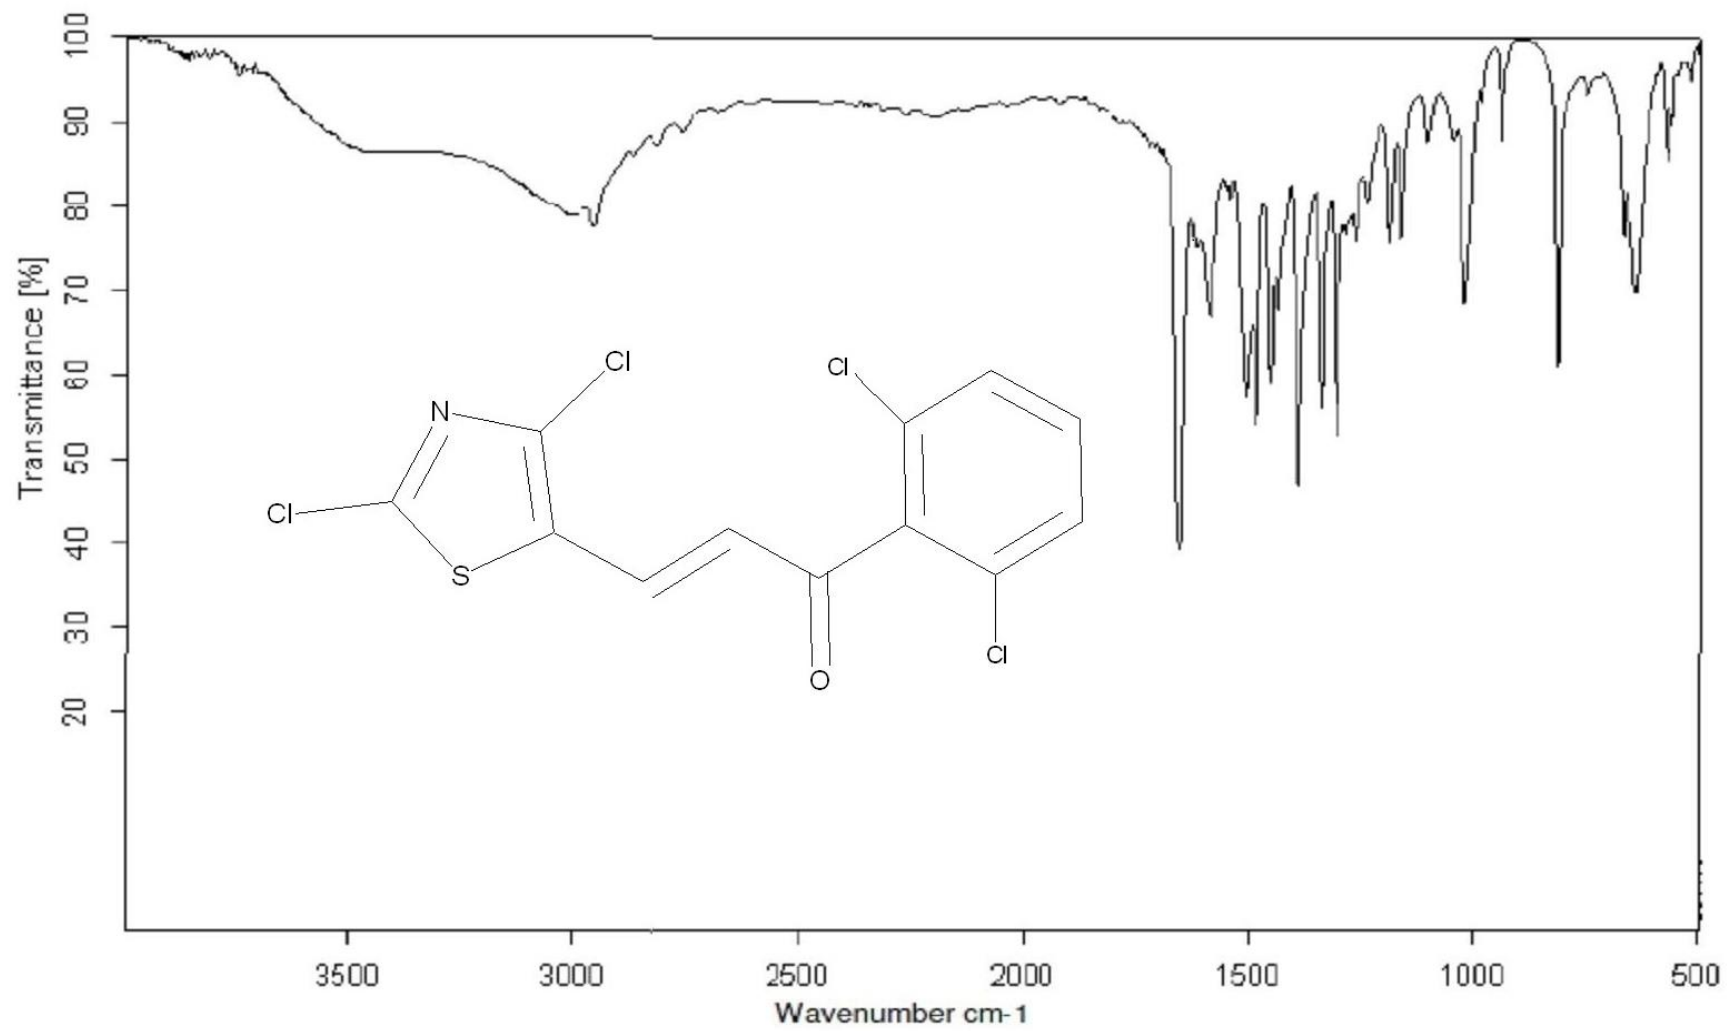

Figure S13. FT-IR Spectrum of compound 5

5 <sup>1</sup>H CDCl<sub>3</sub>

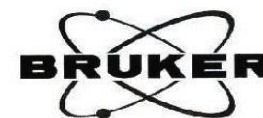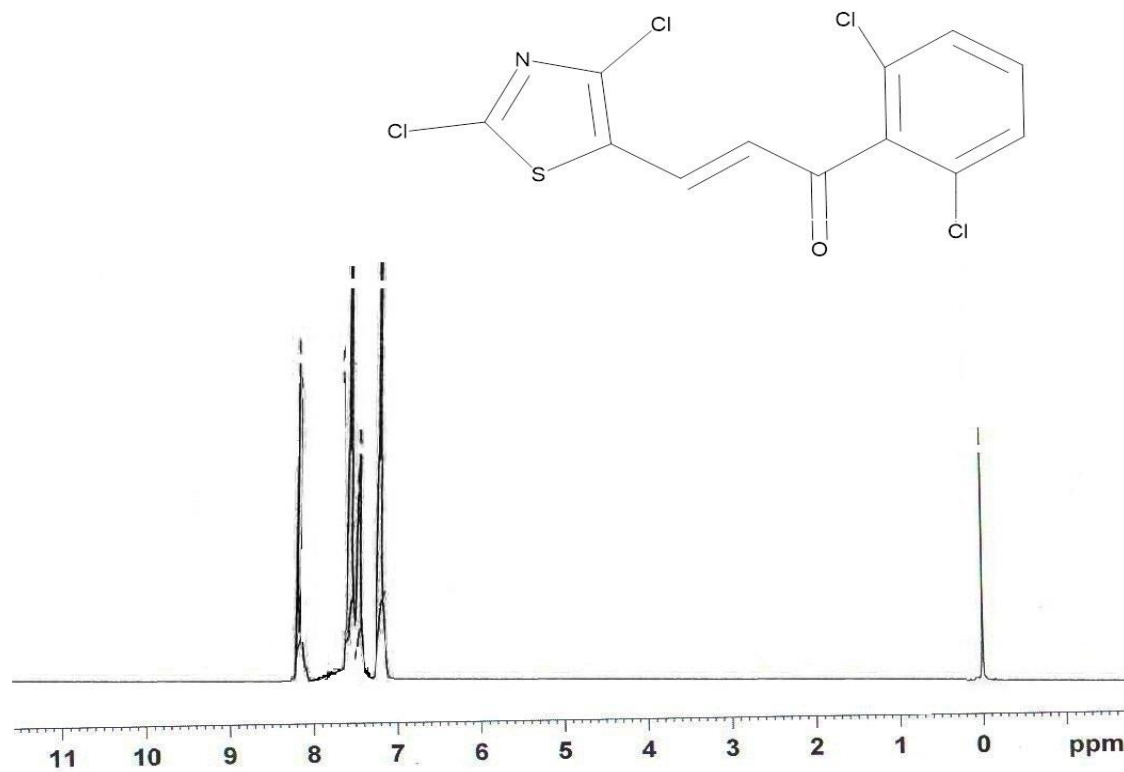

Figure S14. <sup>1</sup>H NMR Spectrum of compound 5

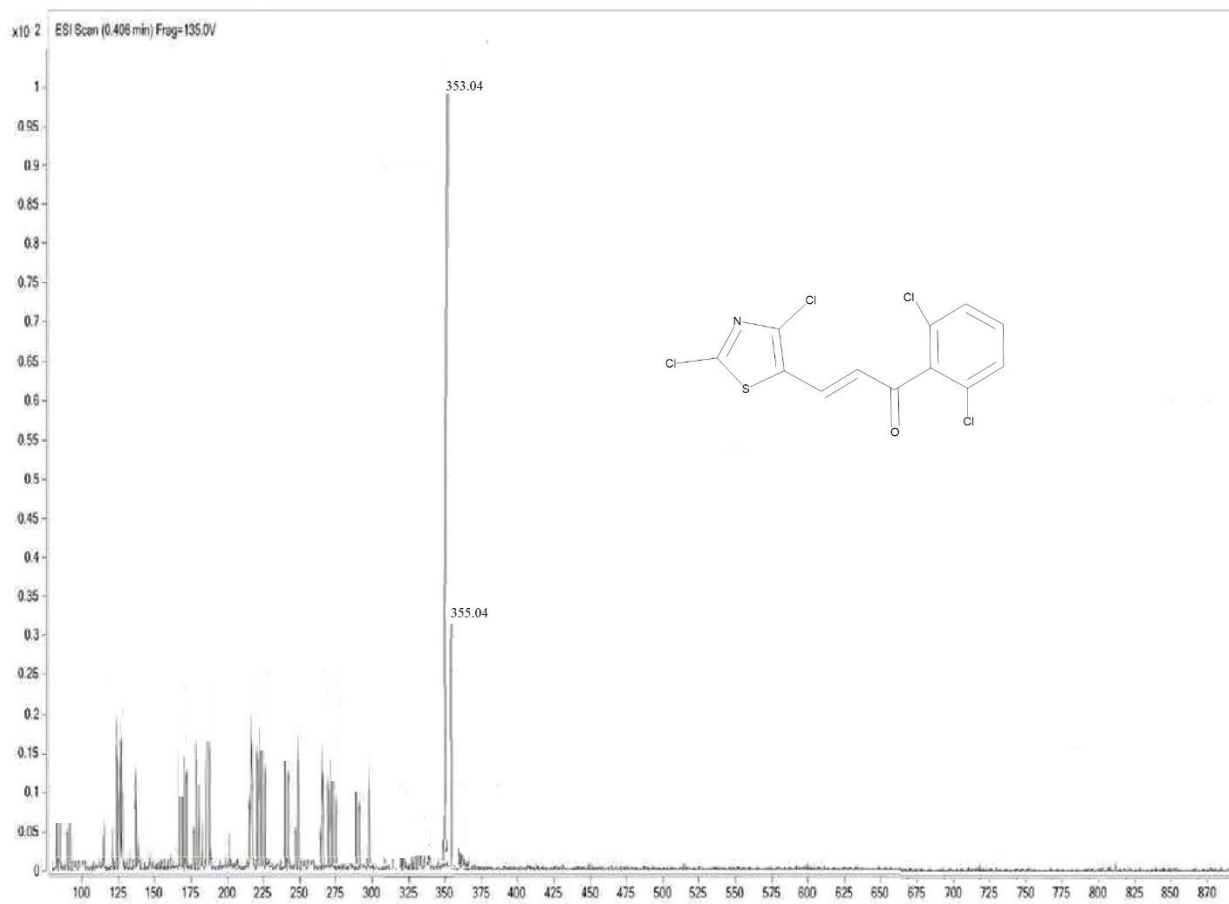

Figure S15. Mass Spectrum of compound 5



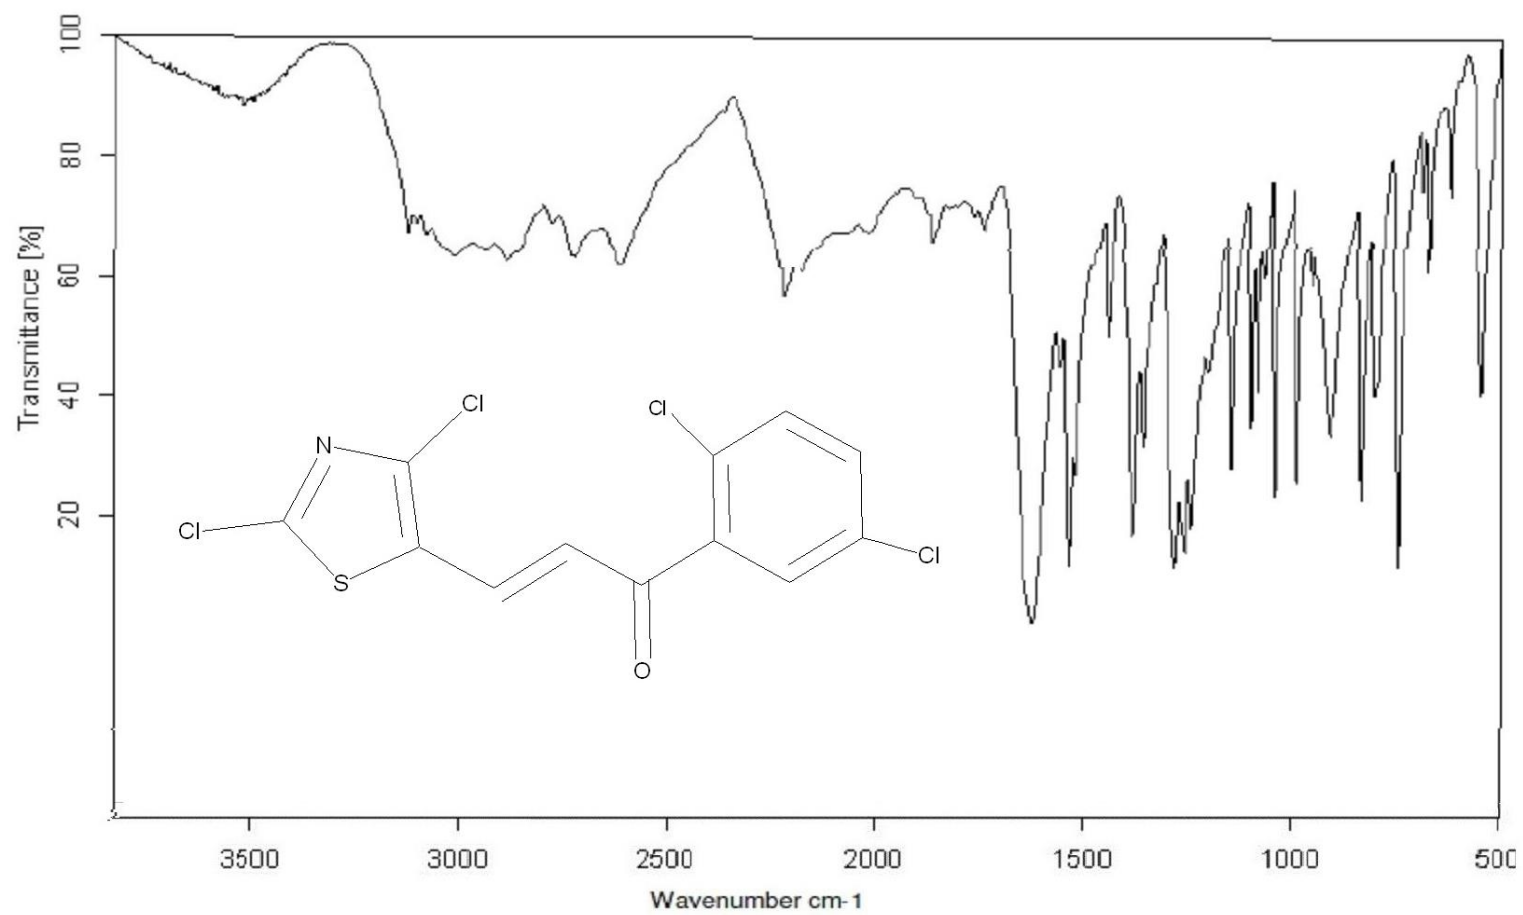

Figure S16. FT-IR Spectrum of compound 6

6 <sup>1</sup>H CDCl<sub>3</sub>

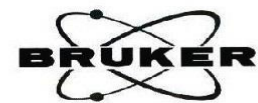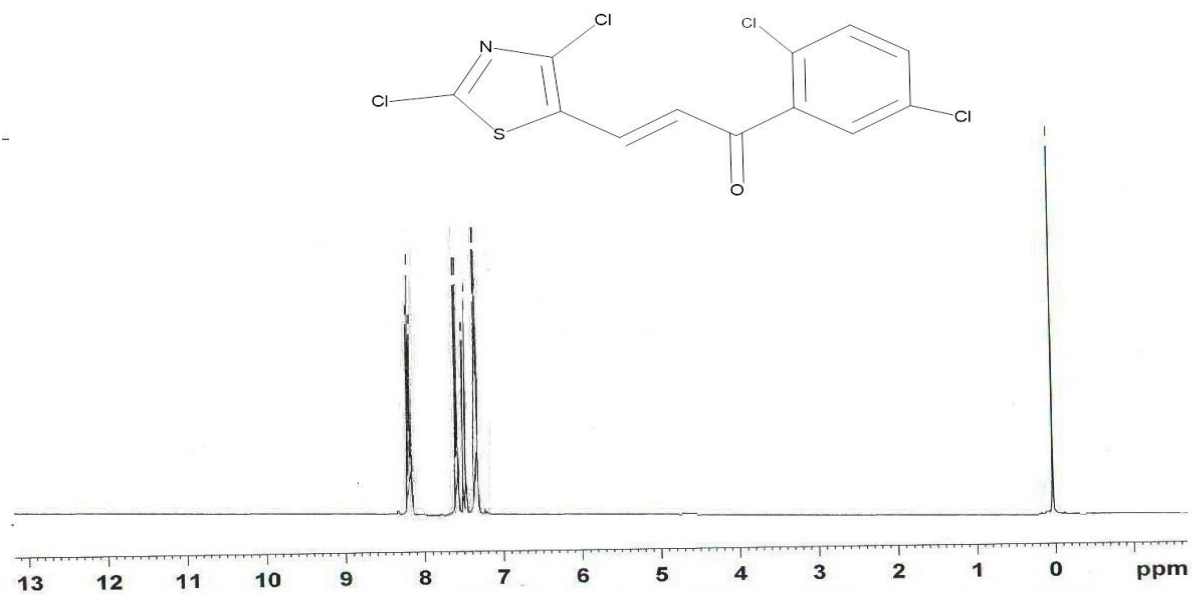

Figure S17. <sup>1</sup>H NMR Spectrum of compound 6

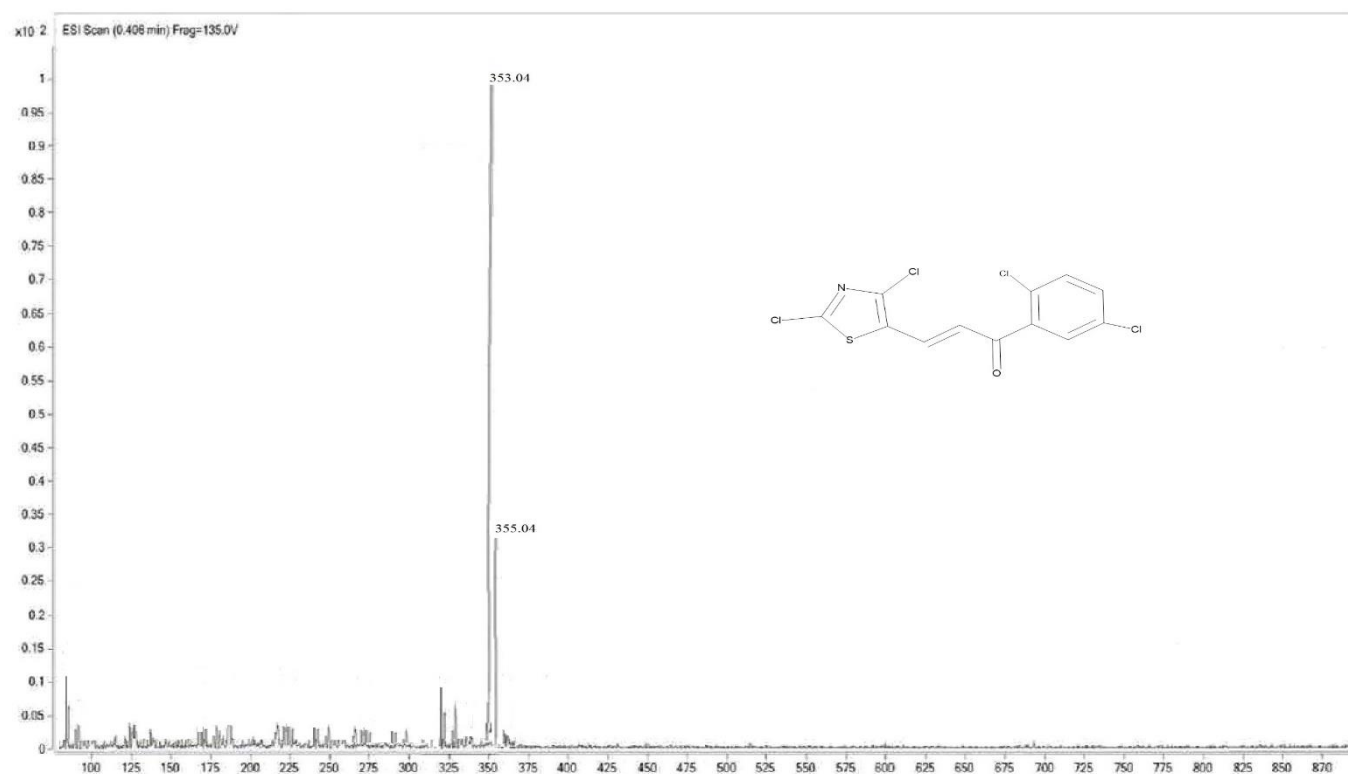

Figure S18. Mass Spectrum of compound 6

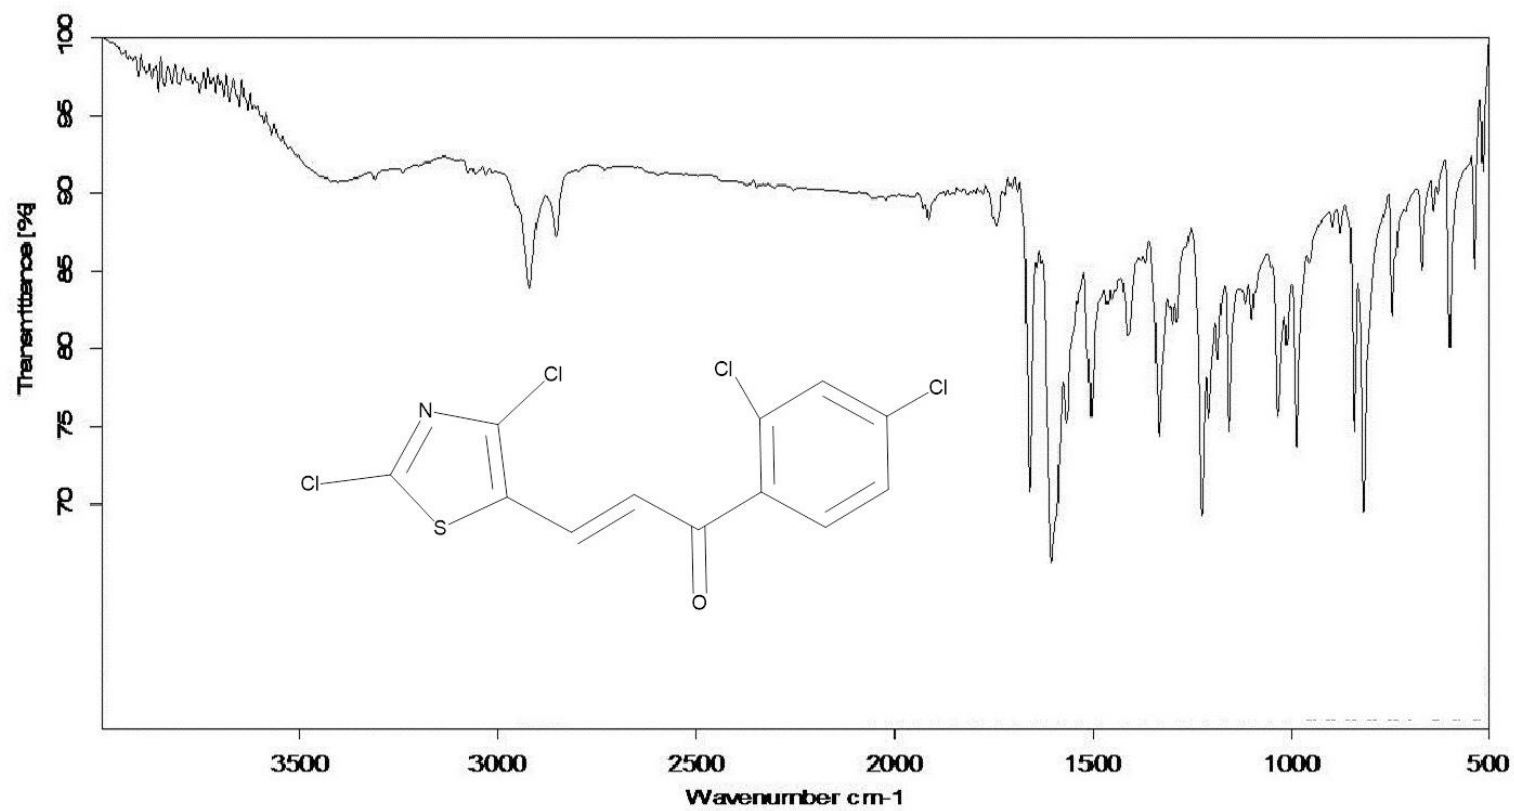

Figure S19. FT-IR Spectrum of compound 7

7 <sup>1</sup>H CDCl<sub>3</sub>

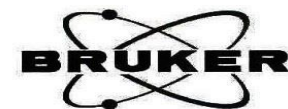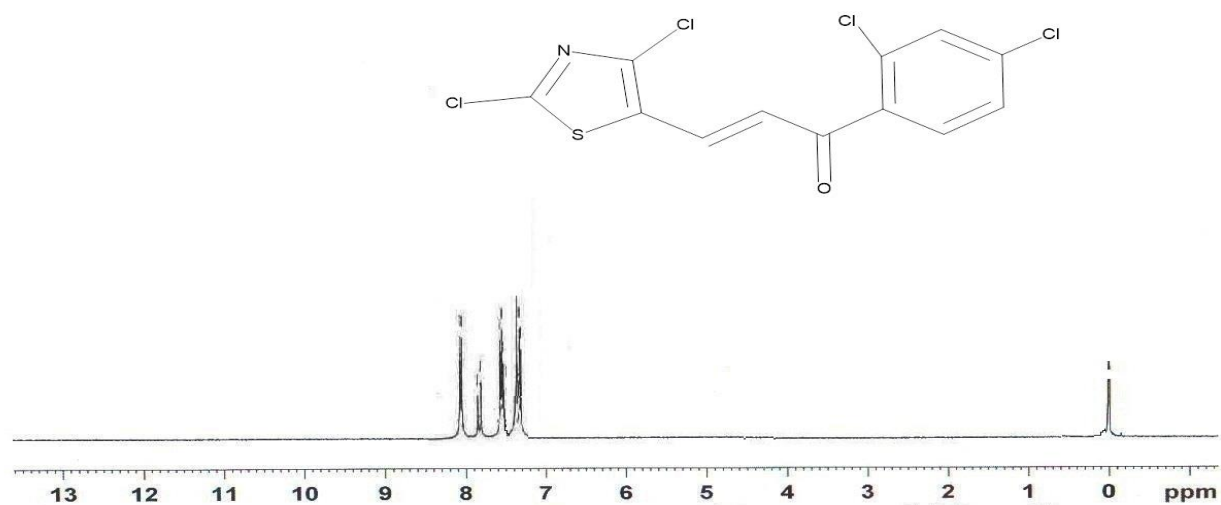

Figure S20. <sup>1</sup>H NMR Spectrum of compound 7

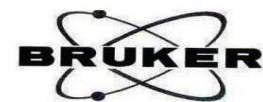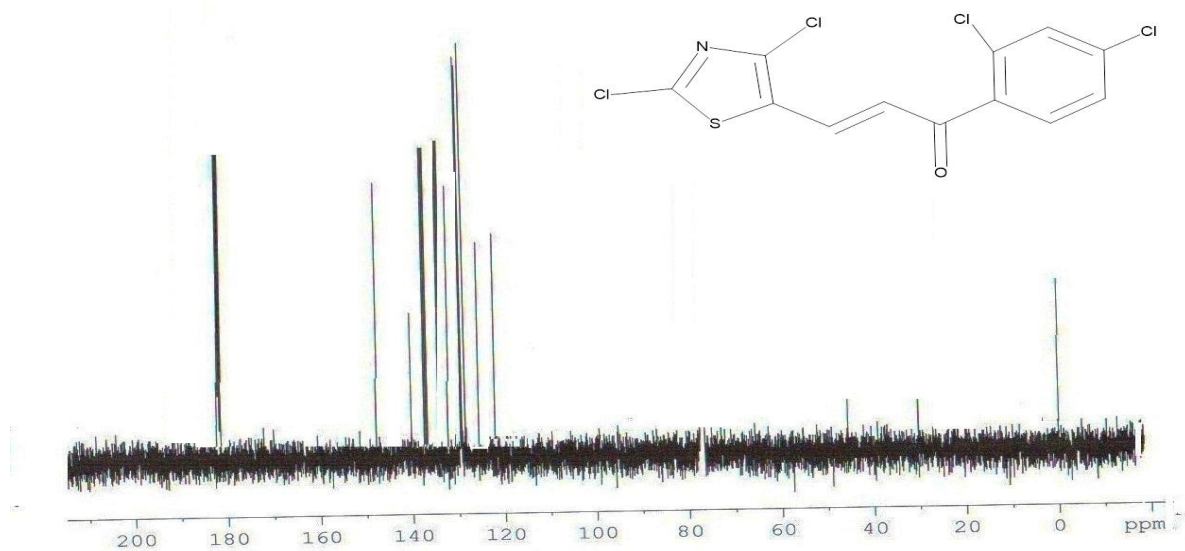

Figure S21.  $^{13}\text{C}$  NMR Spectrum of compound 7

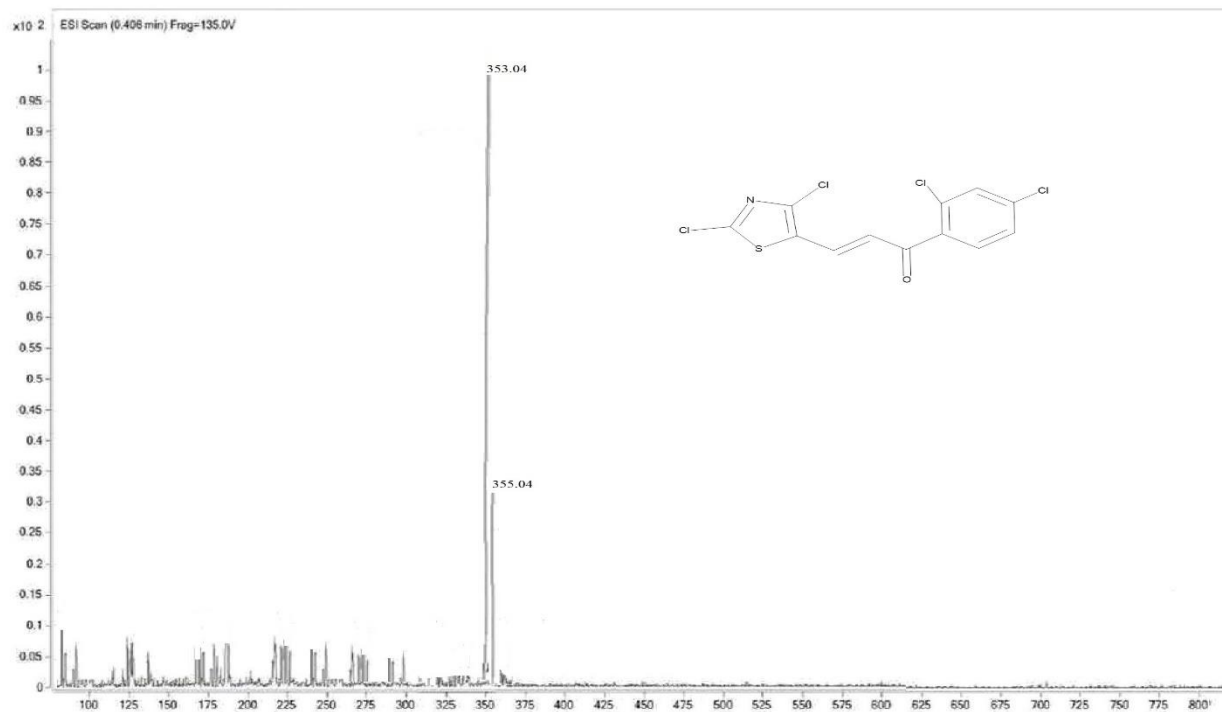

Figure S22. Mass Spectrum of compound 7

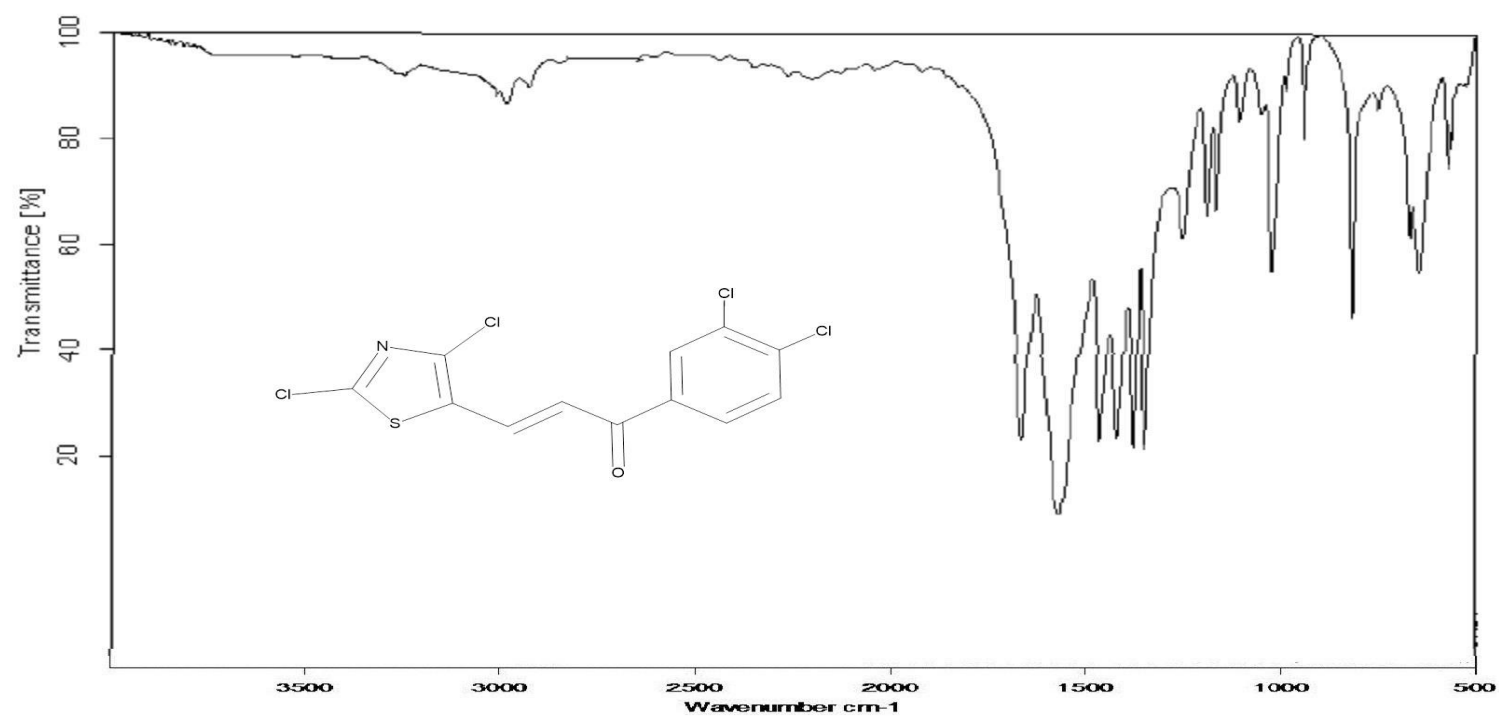

Figure 23. FT-IR Spectrum of compound 8



81H CDC13

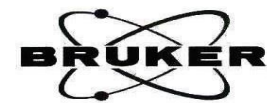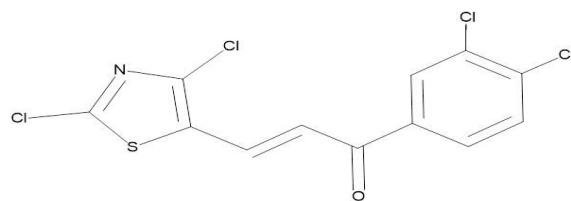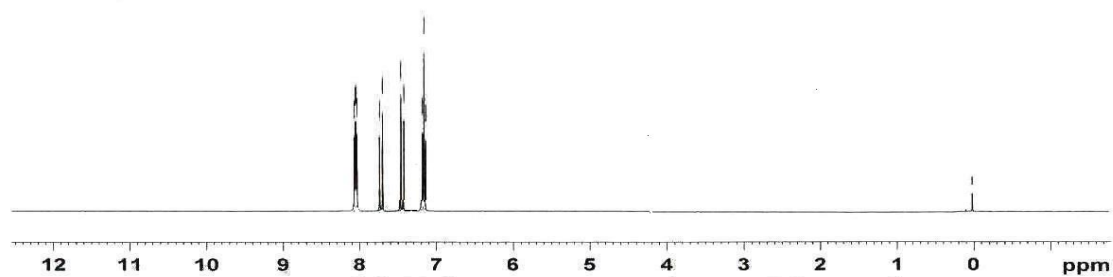

Figure S24. <sup>1</sup>H NMR Spectrum of compound 8

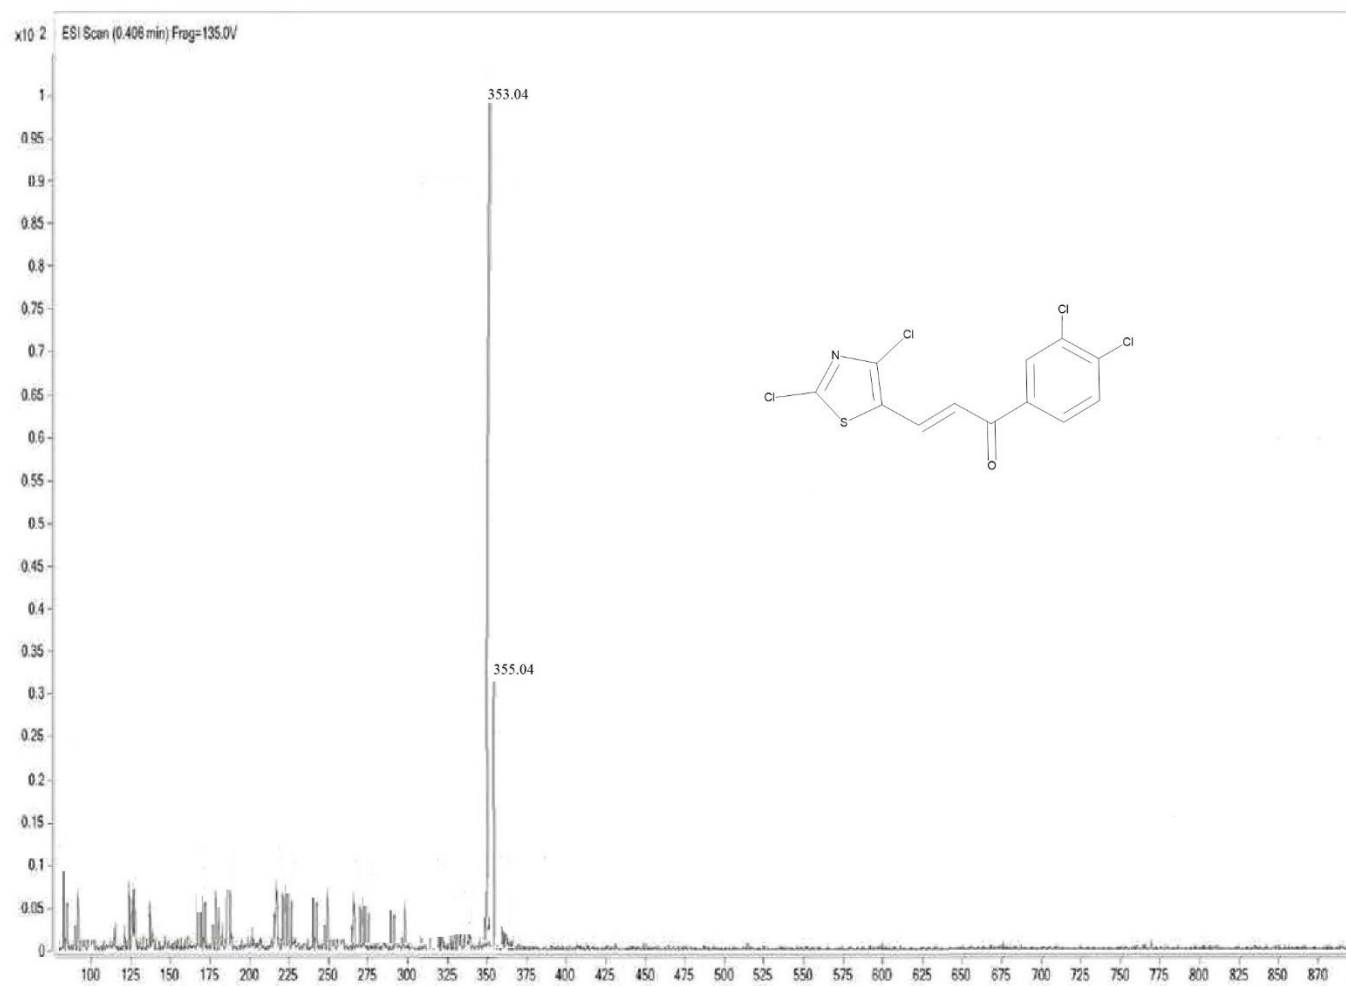

Figure S25. Mass Spectrum of compound 8

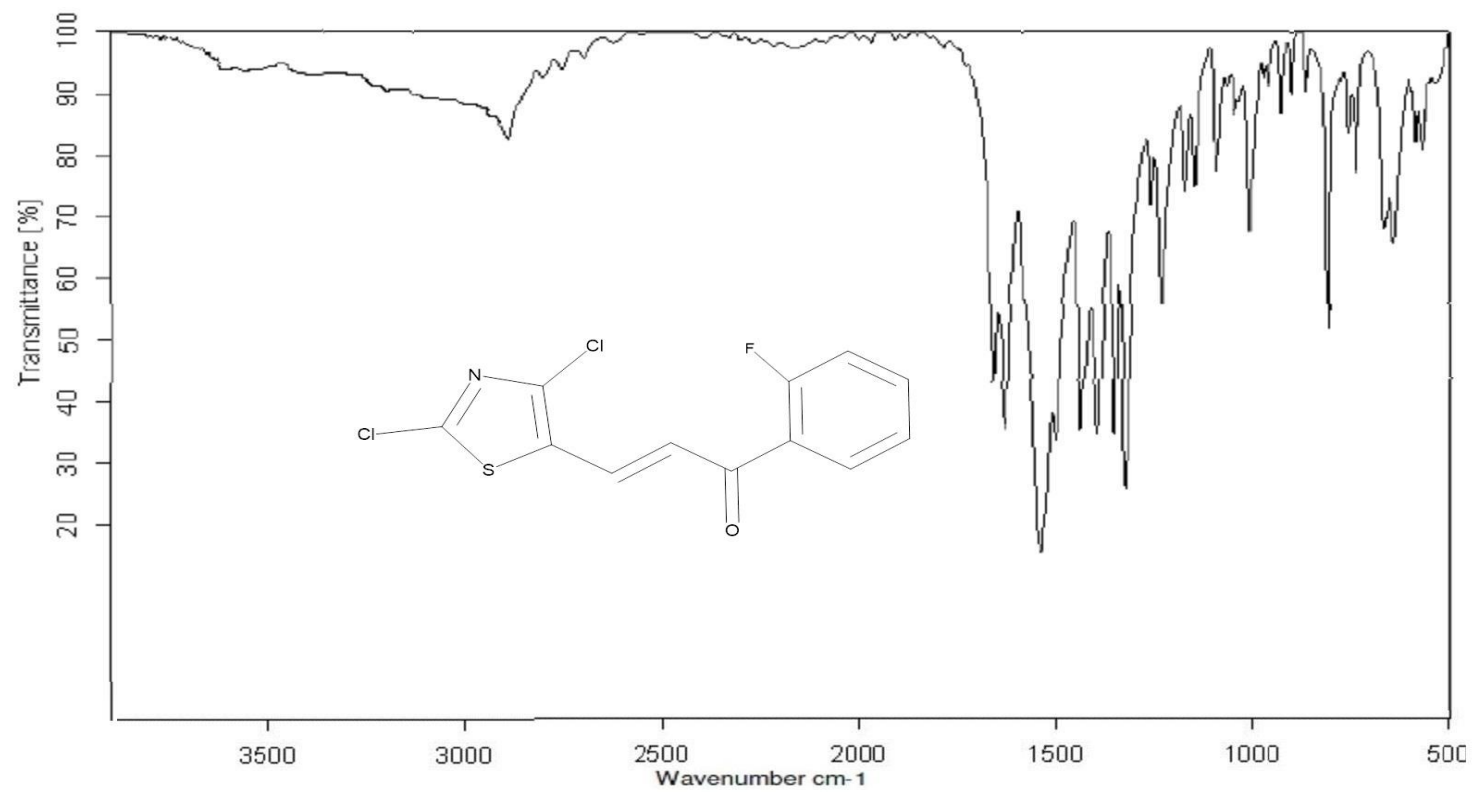

Figure S26. FT-IR Spectrum of compound 9

9 1H CDCl3

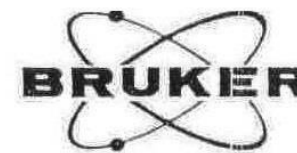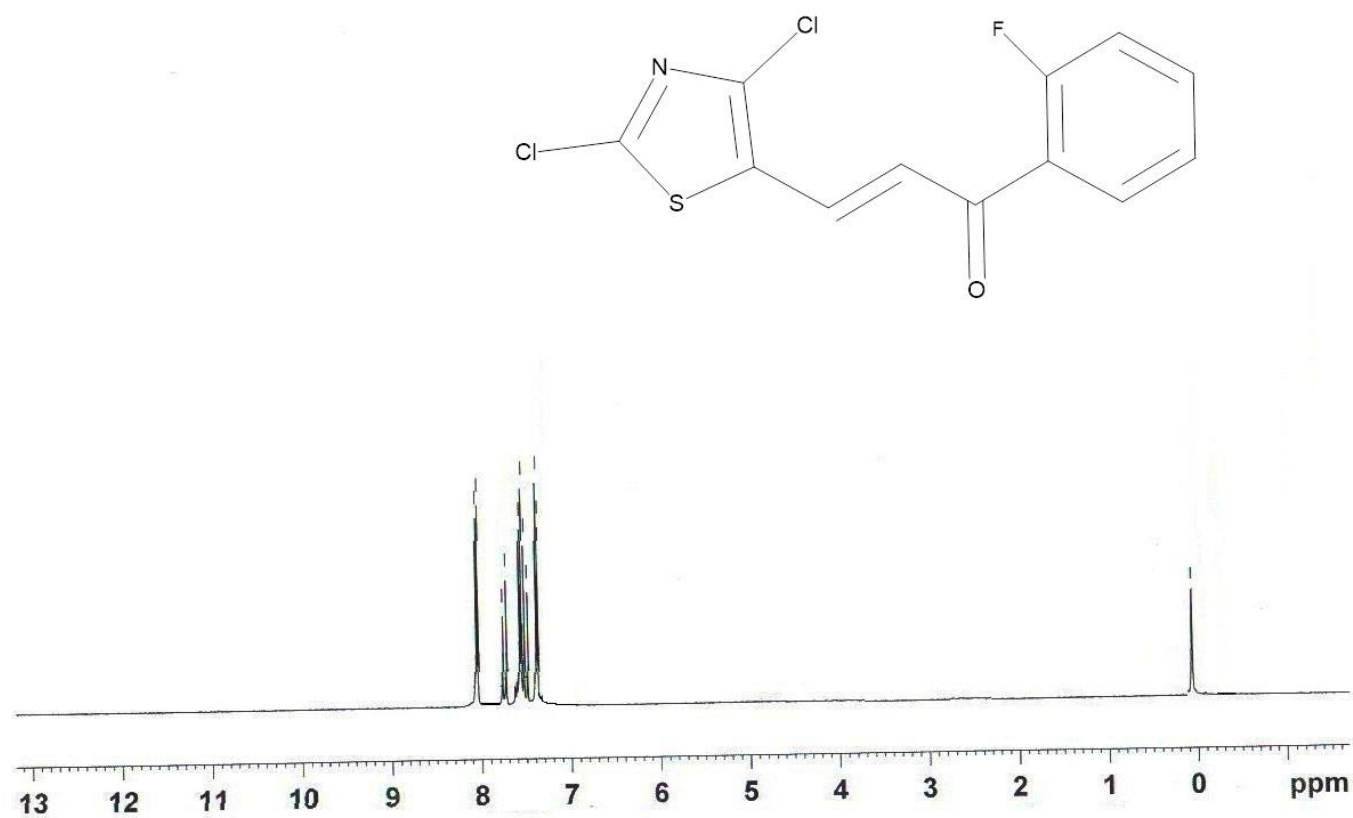

Figure S27. <sup>1</sup>H NMR Spectrum of compound 9

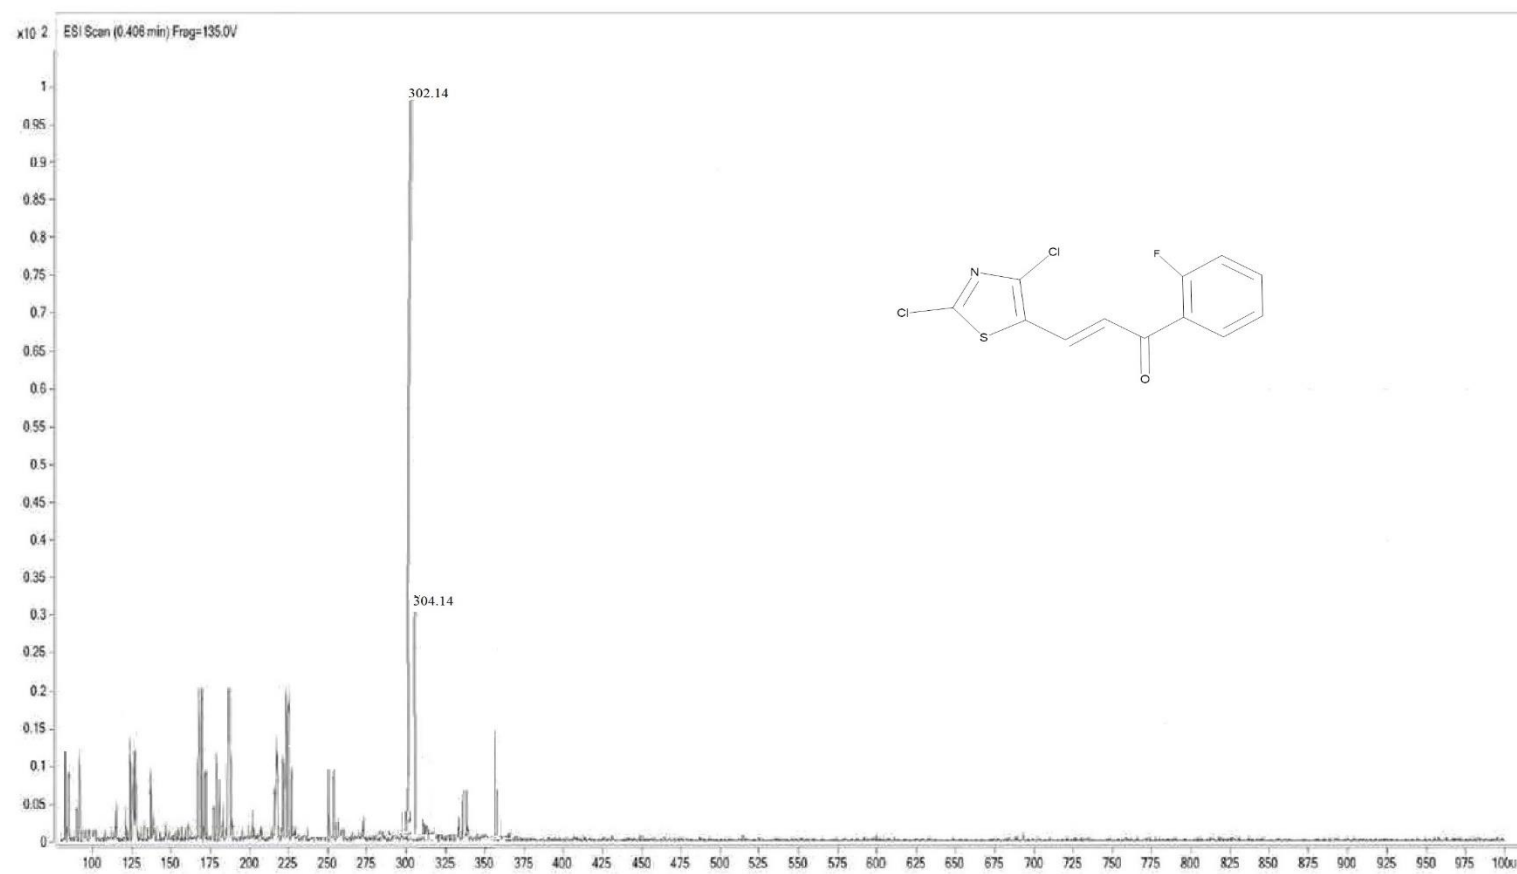

Figure S28. Mass Spectrum of compound 9

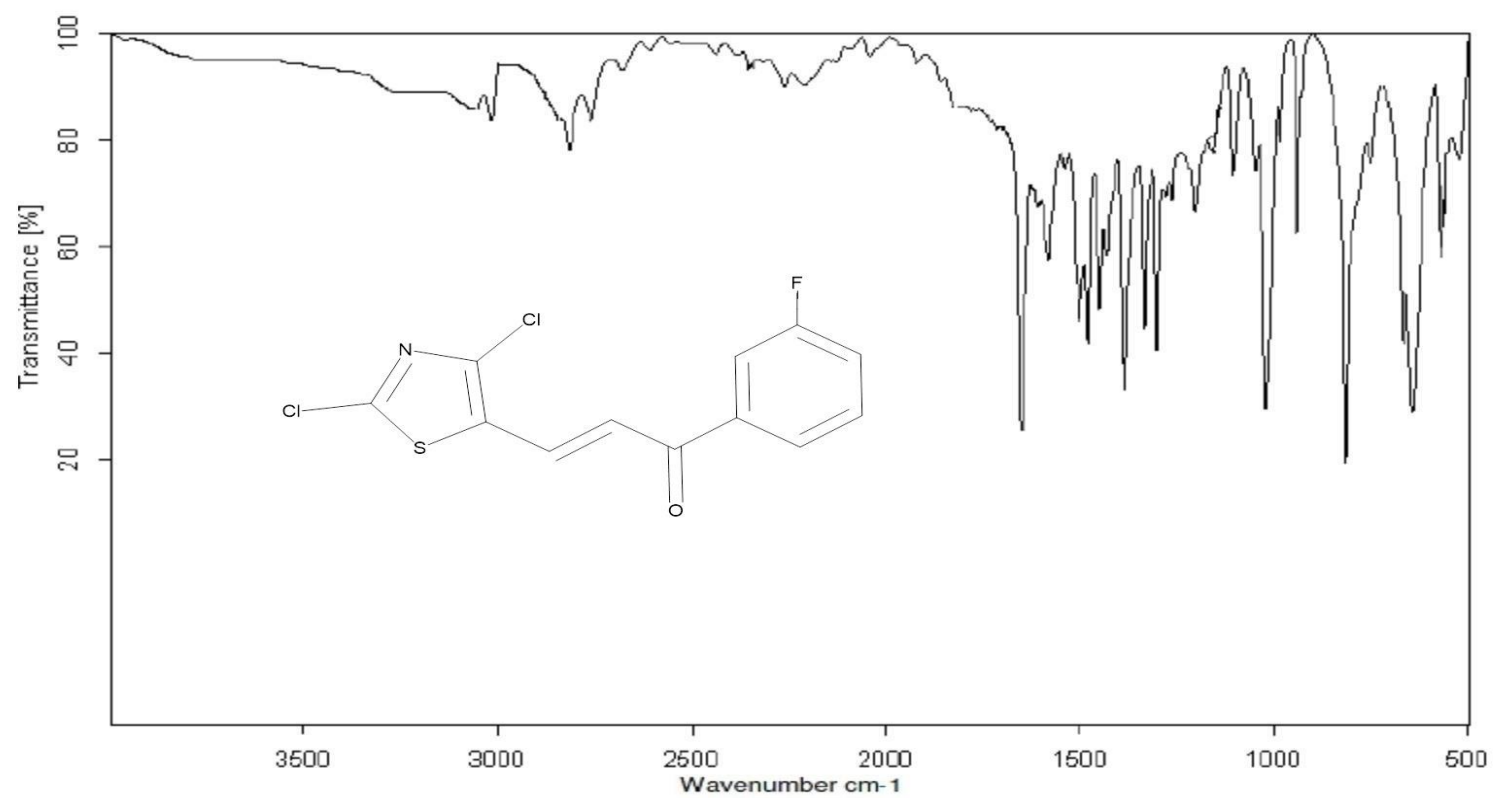

Figure S29. FT-IR Spectrum of compound 10

10  $^1\text{H}$   $\text{CDCl}_3$

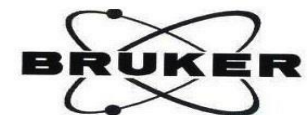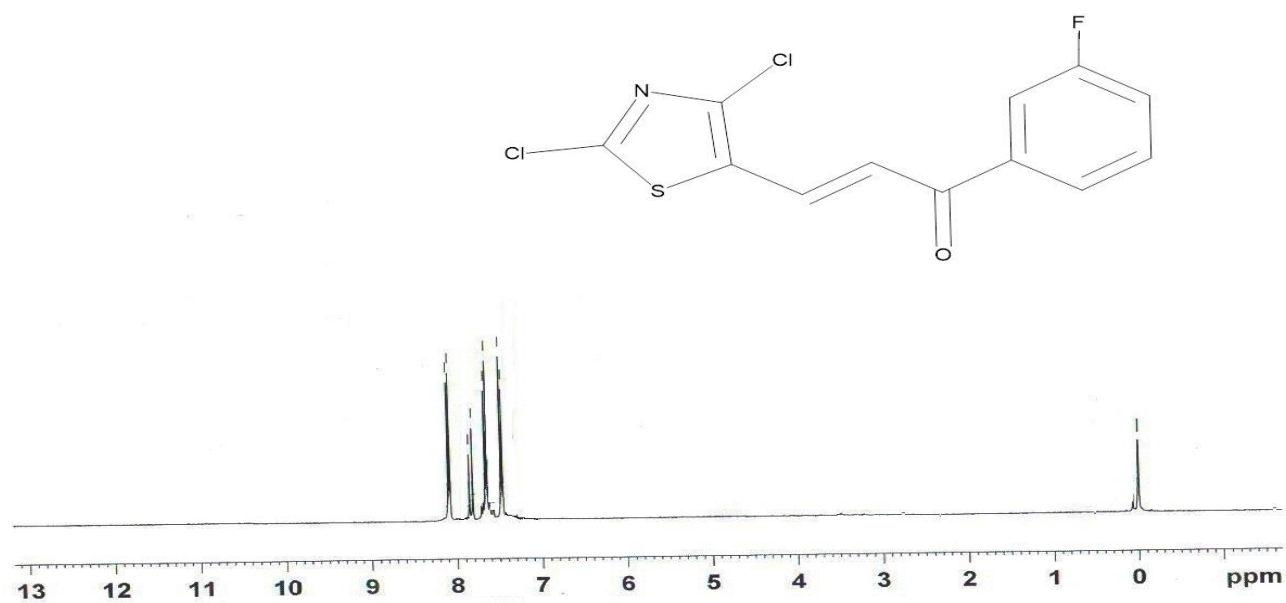

Figure S30.  $^1\text{H}$  NMR Spectrum of compound 10

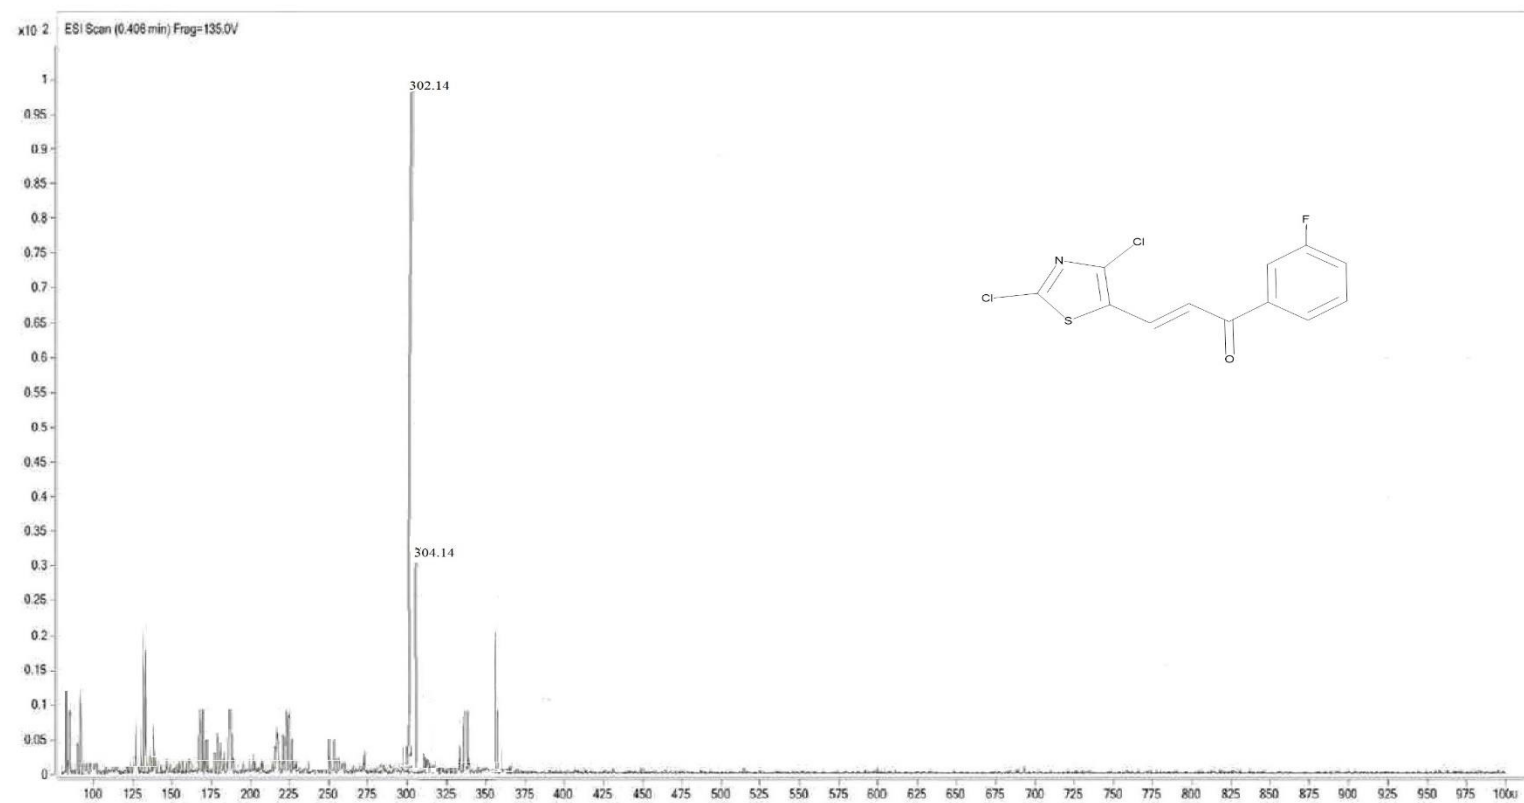

Figure S31. Mass Spectrum of compound 10



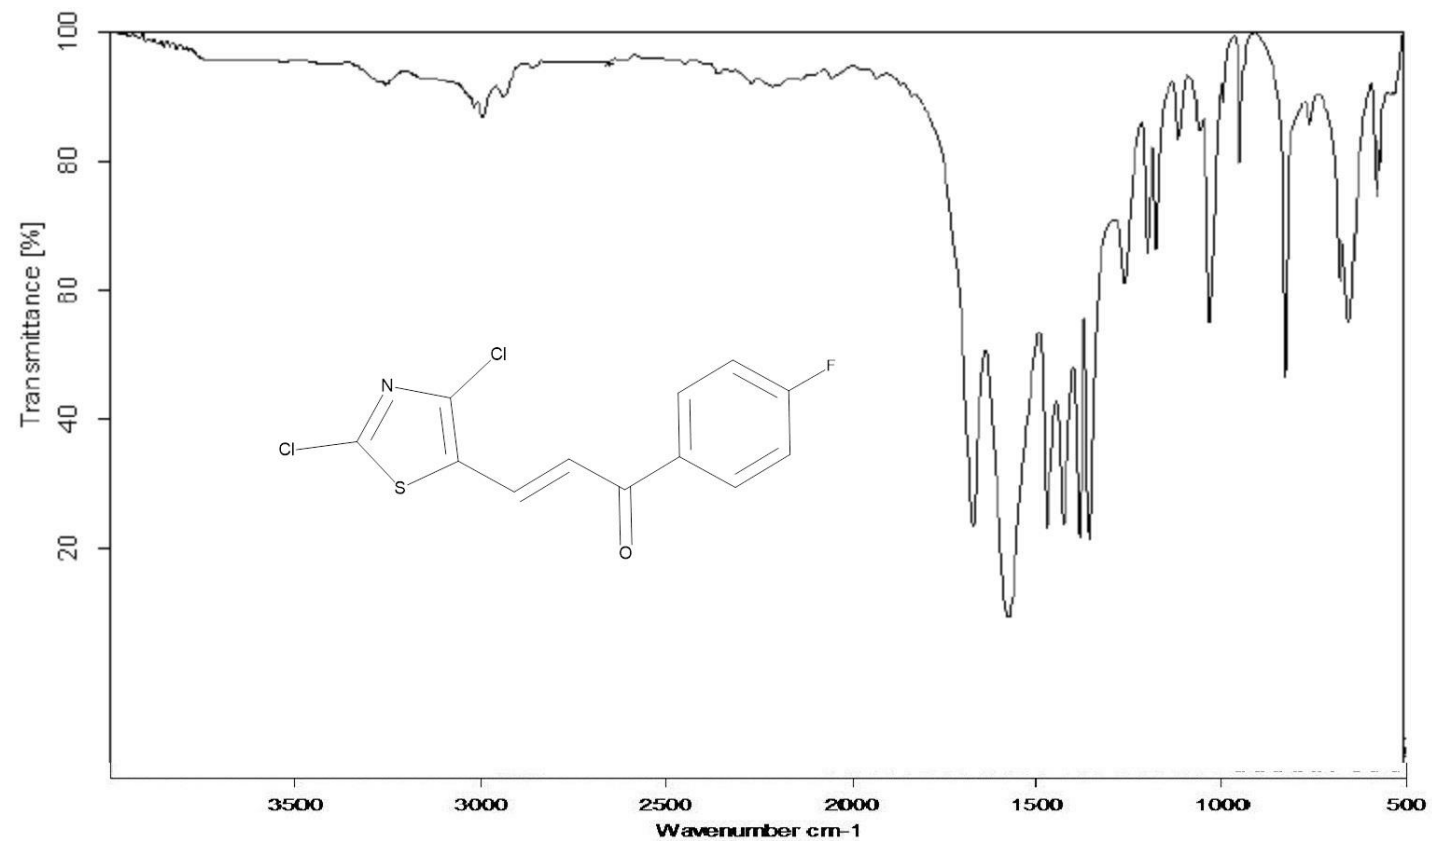

Figure S32. FT-IR Spectrum of compound 11

11 <sup>1</sup>H CDCl<sub>3</sub>

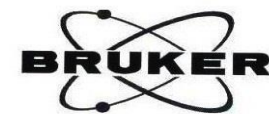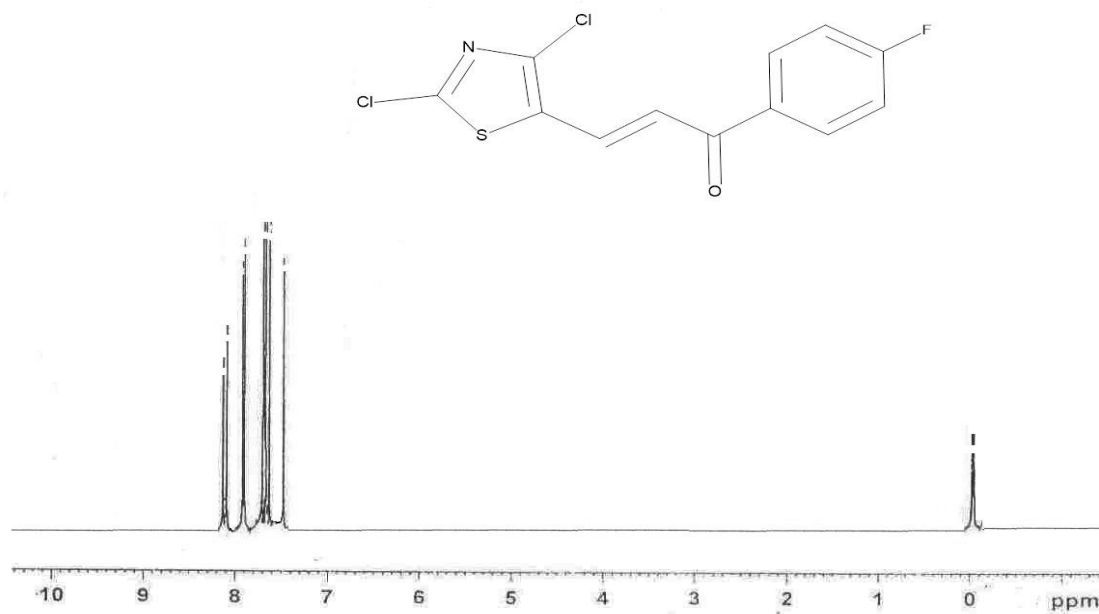

Figure S33. <sup>1</sup>H NMR Spectrum of compound 11

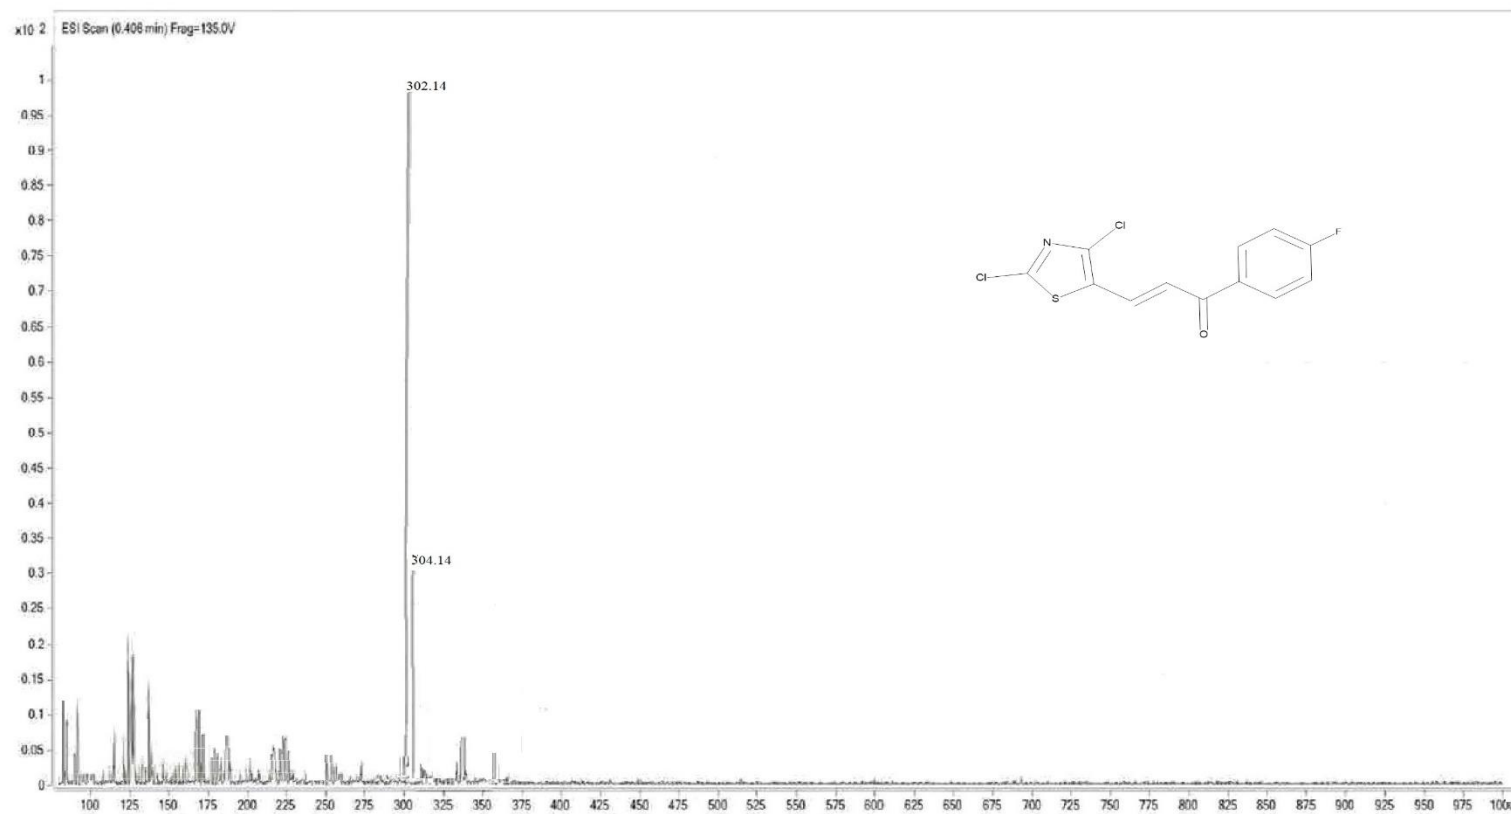

Figure S34. Mass Spectrum of compound 11

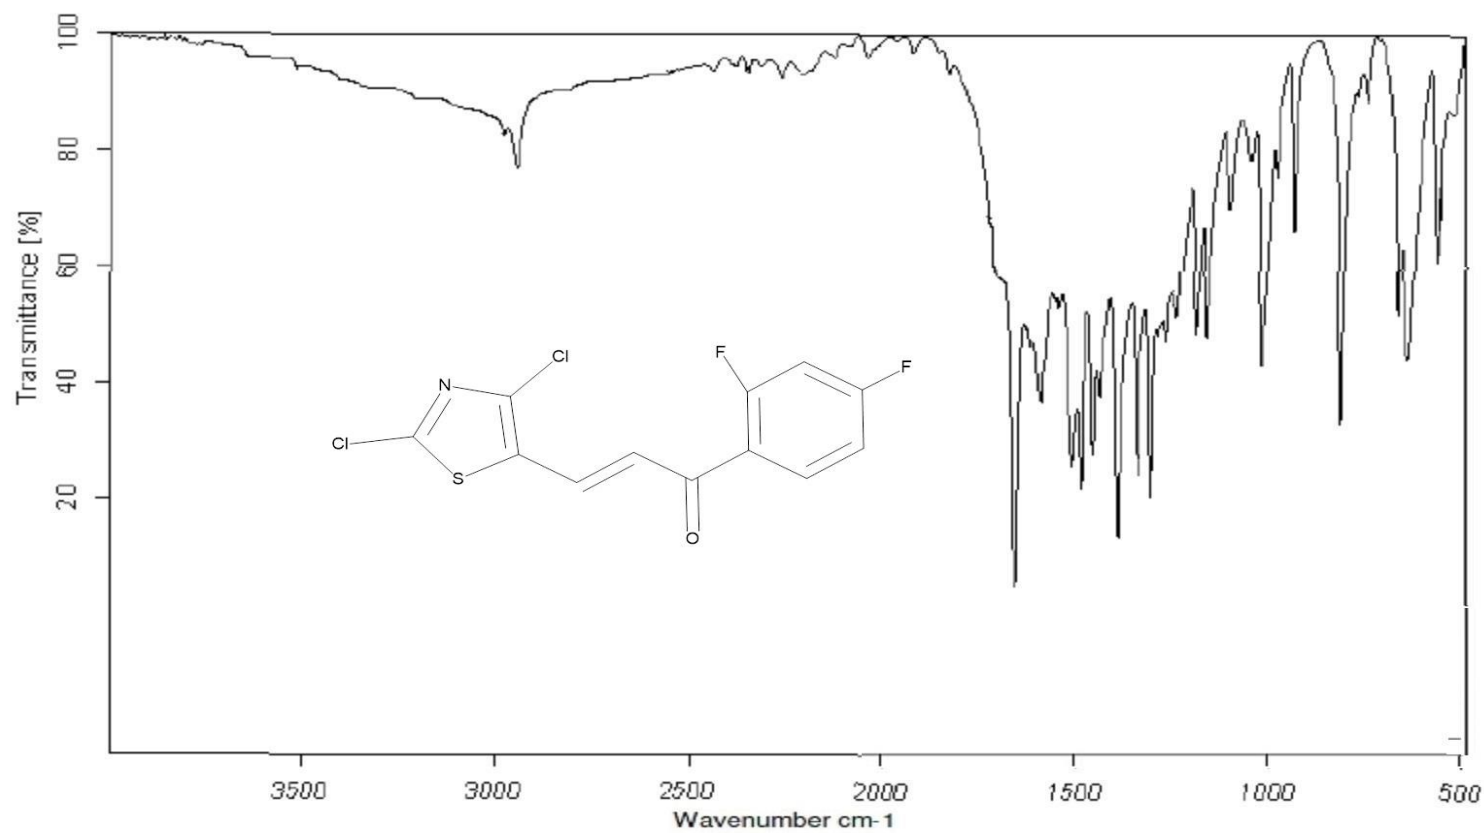

Figure S35. FT-IR Spectrum of compound 12

12 1H CDC13

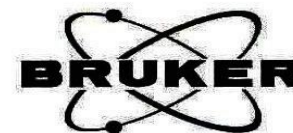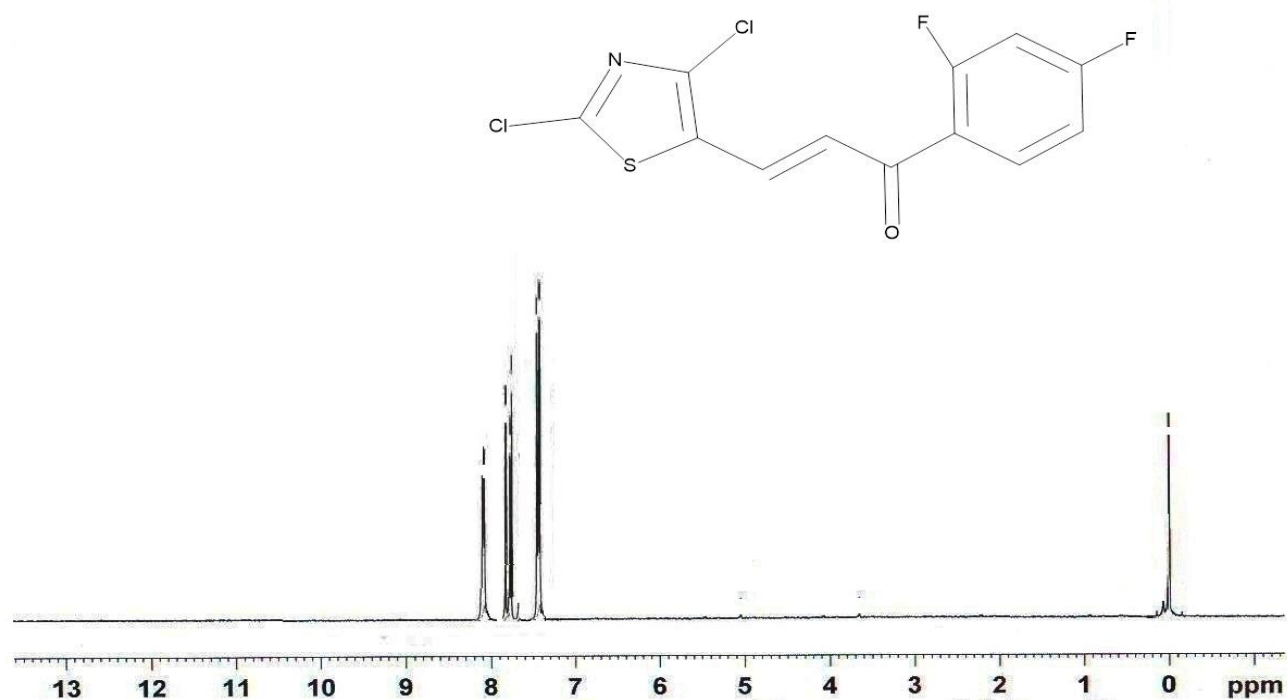

Figure S36. <sup>1</sup>H NMR Spectrum of compound 12

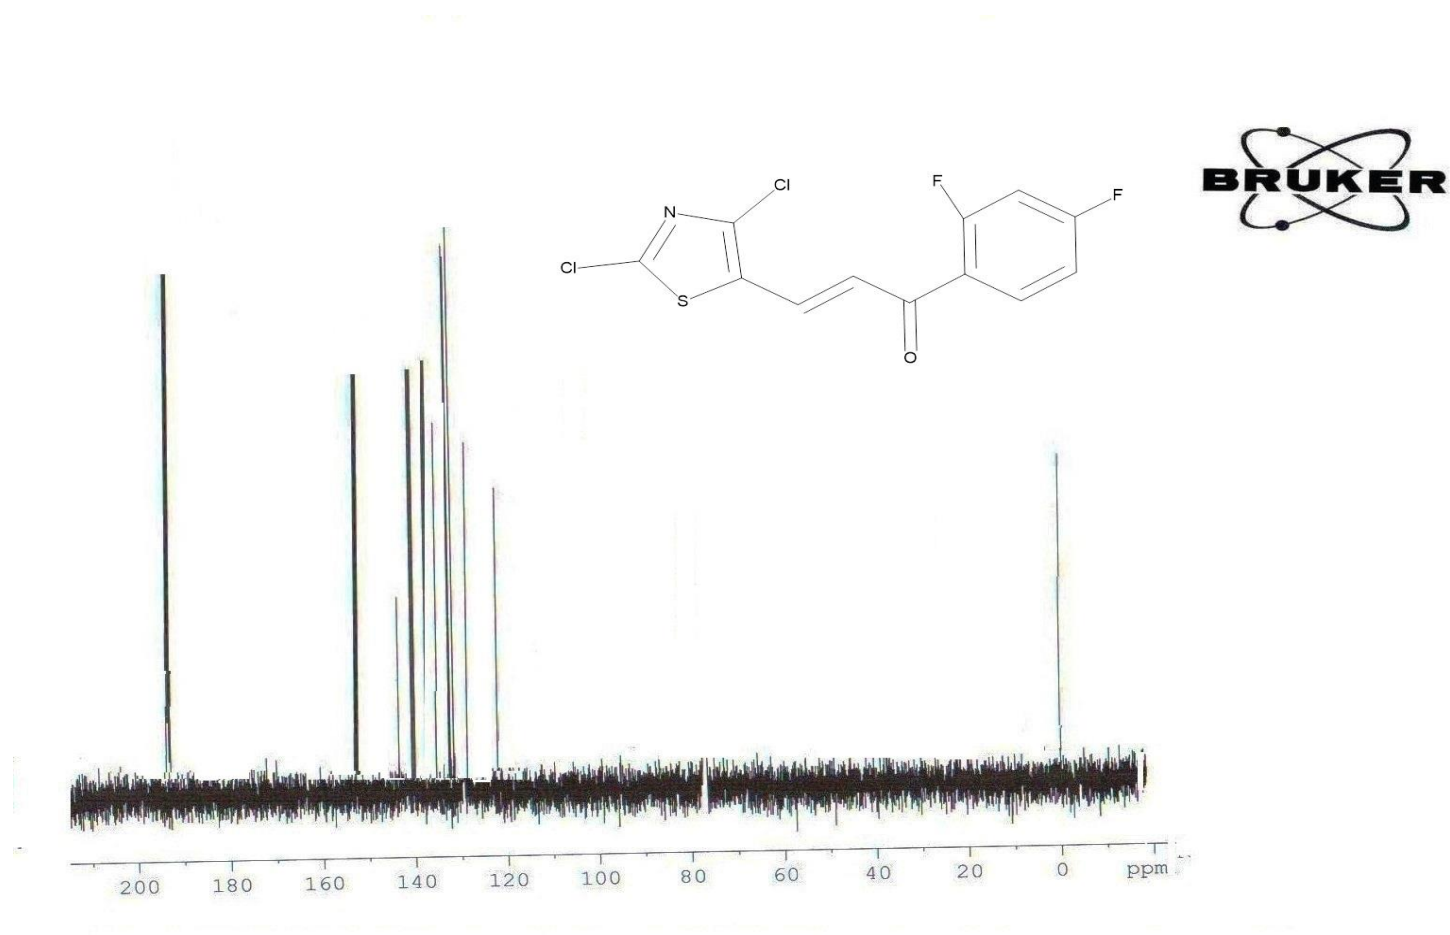

Figure S37.  $^{13}\text{C}$  NMR Spectrum of compound 12

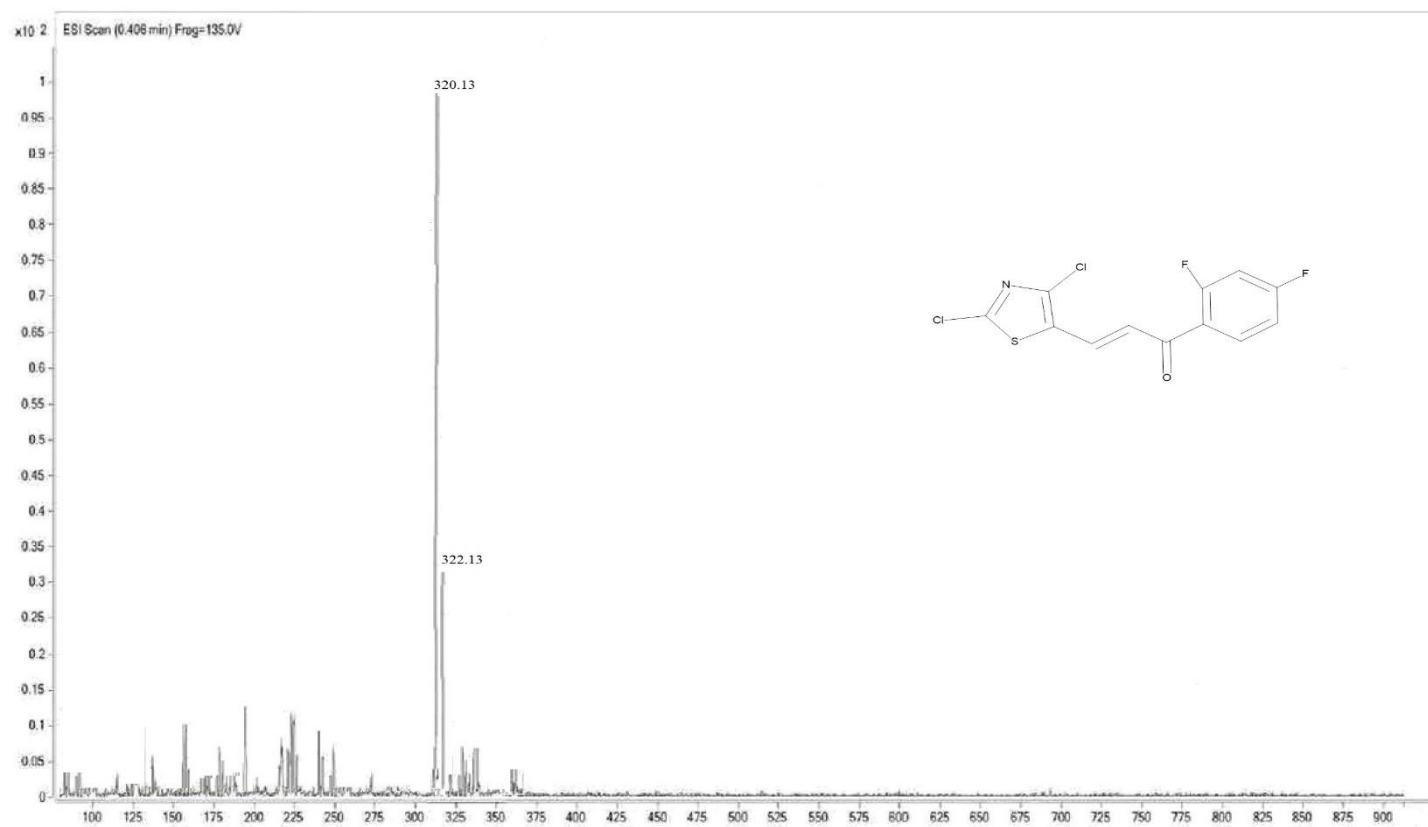

Figure S38. Mass Spectrum of compound 12

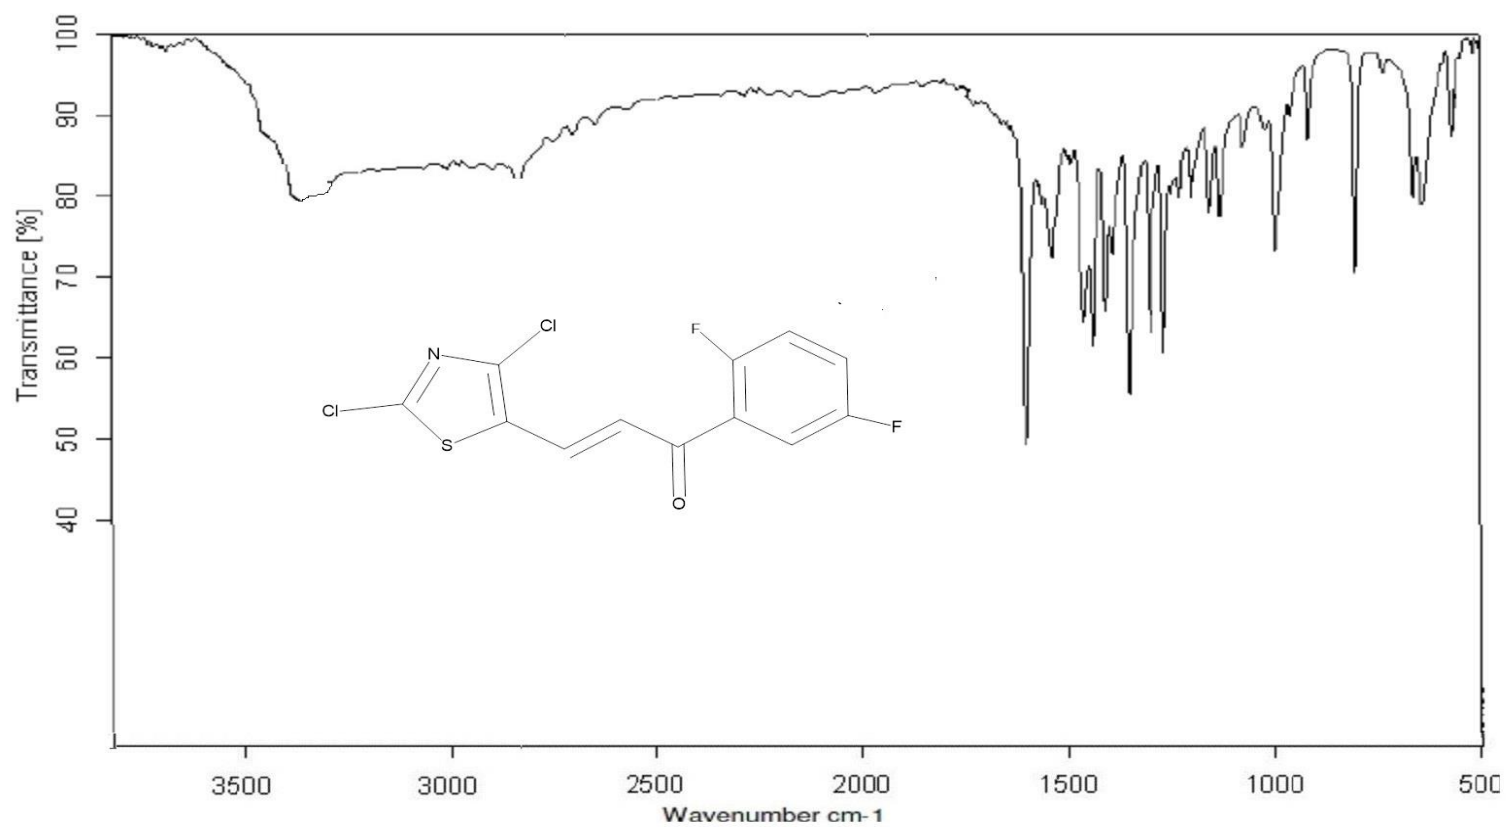

Figure S39. FT-IR Spectrum of compound 13



13 <sup>1</sup>H CDCl<sub>3</sub>

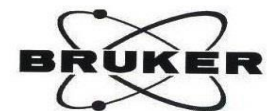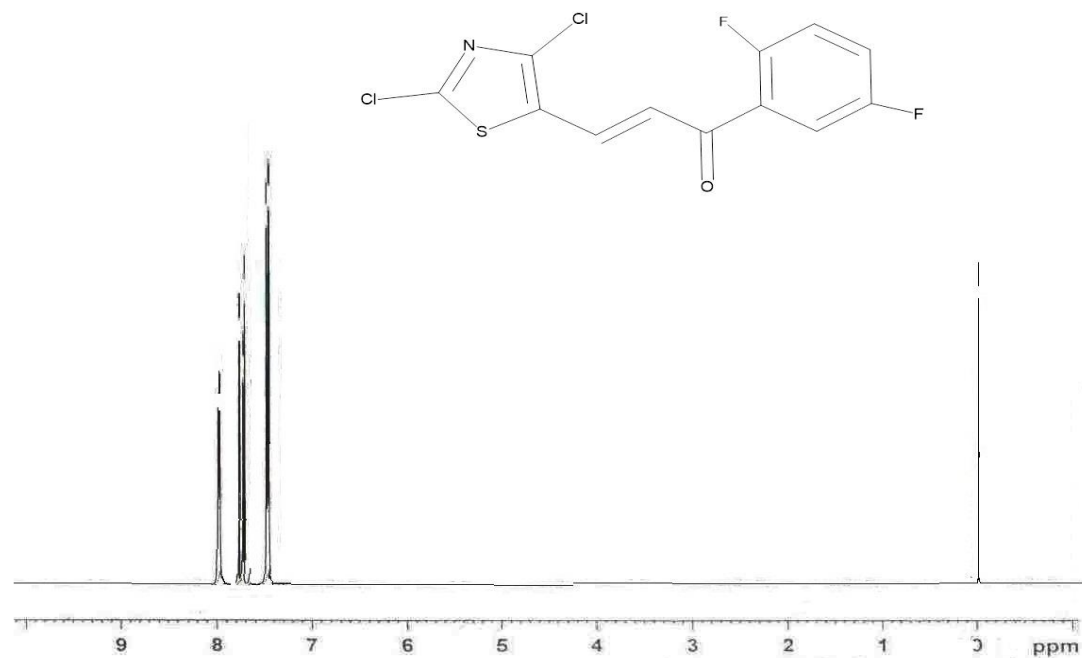

Figure S40. <sup>1</sup>H NMR Spectrum of compound 13

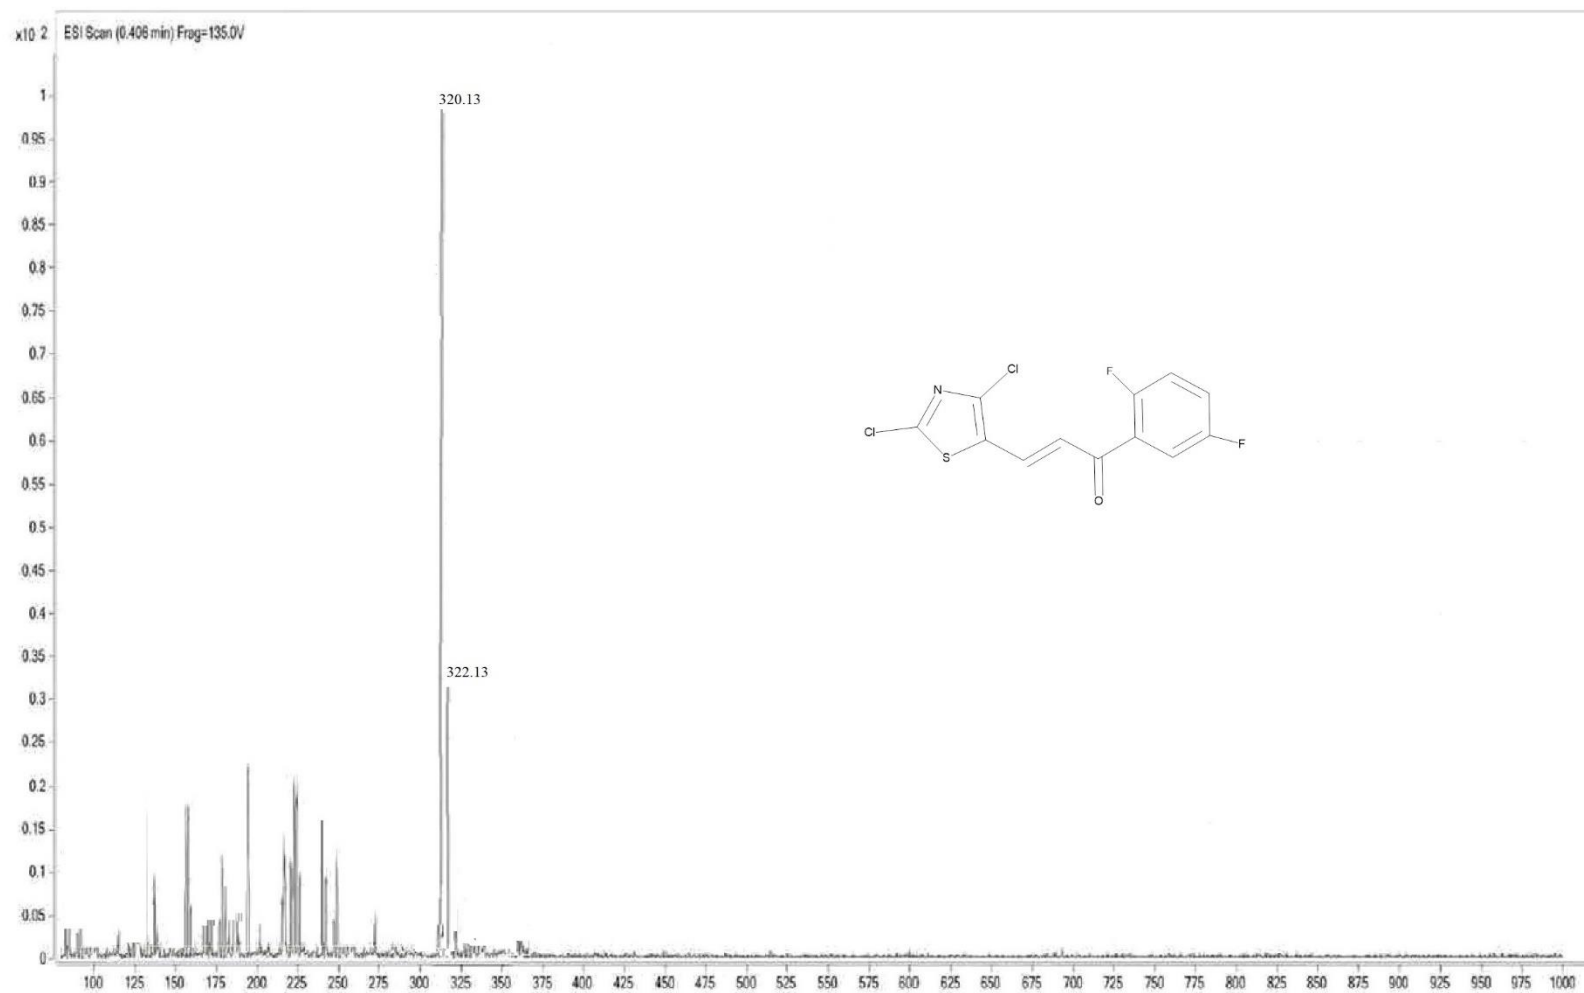

Figure S41. Mass Spectrum of compound 13

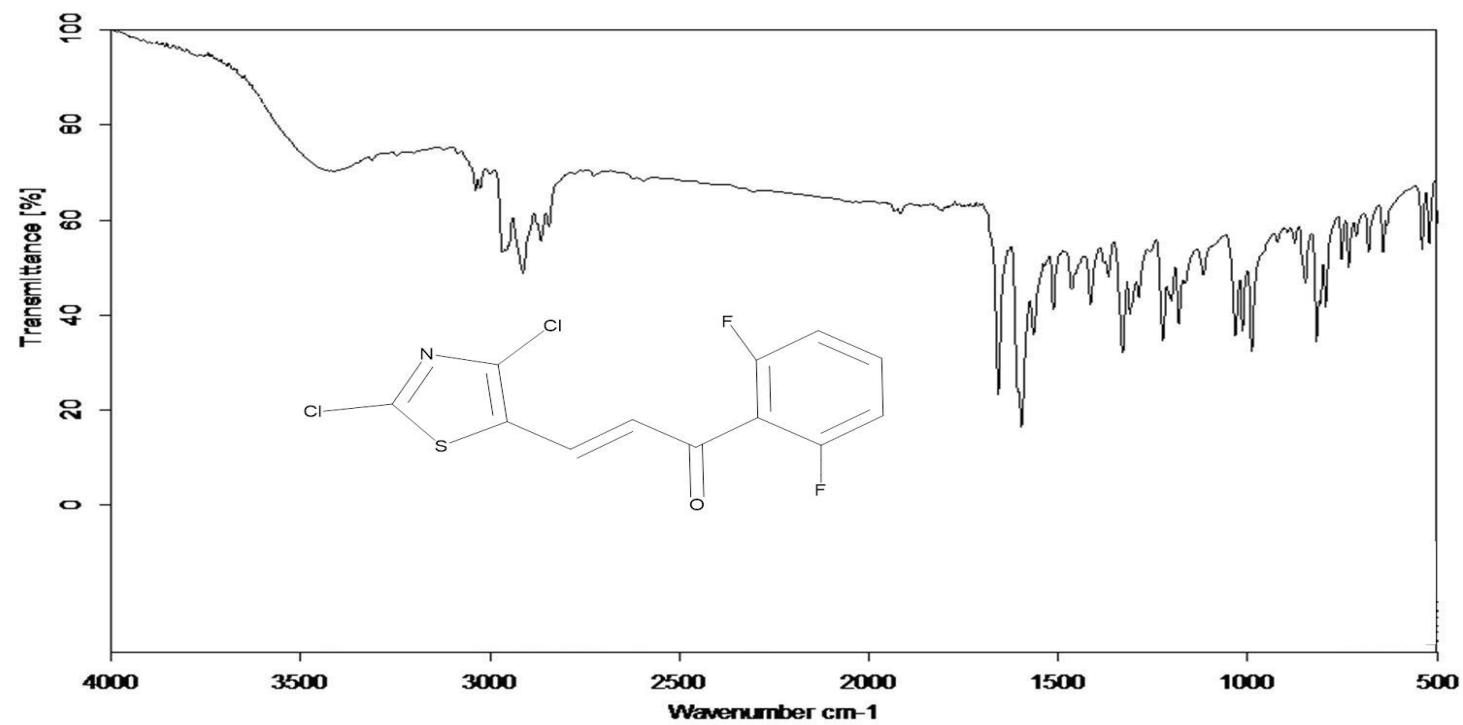

Figure S42. FT-IR Spectrum of compound 14

14 1H CDCl3

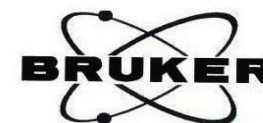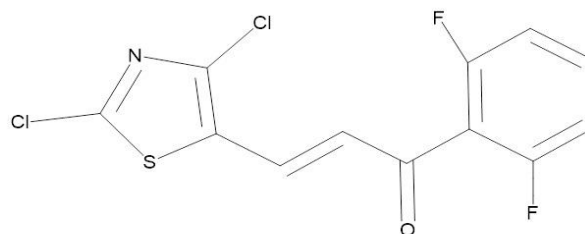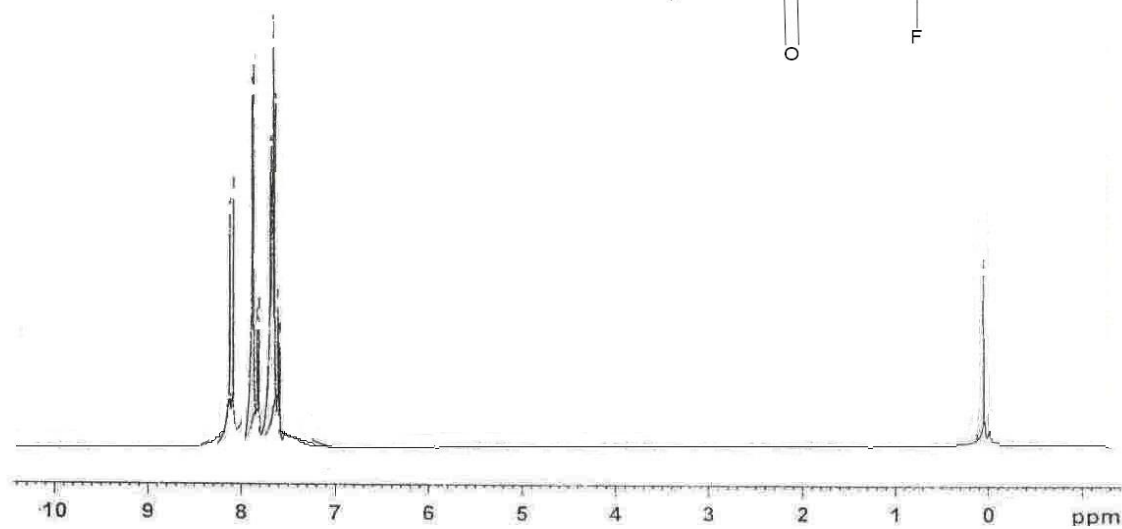

Figure S43. <sup>1</sup>H NMR Spectrum of compound 14

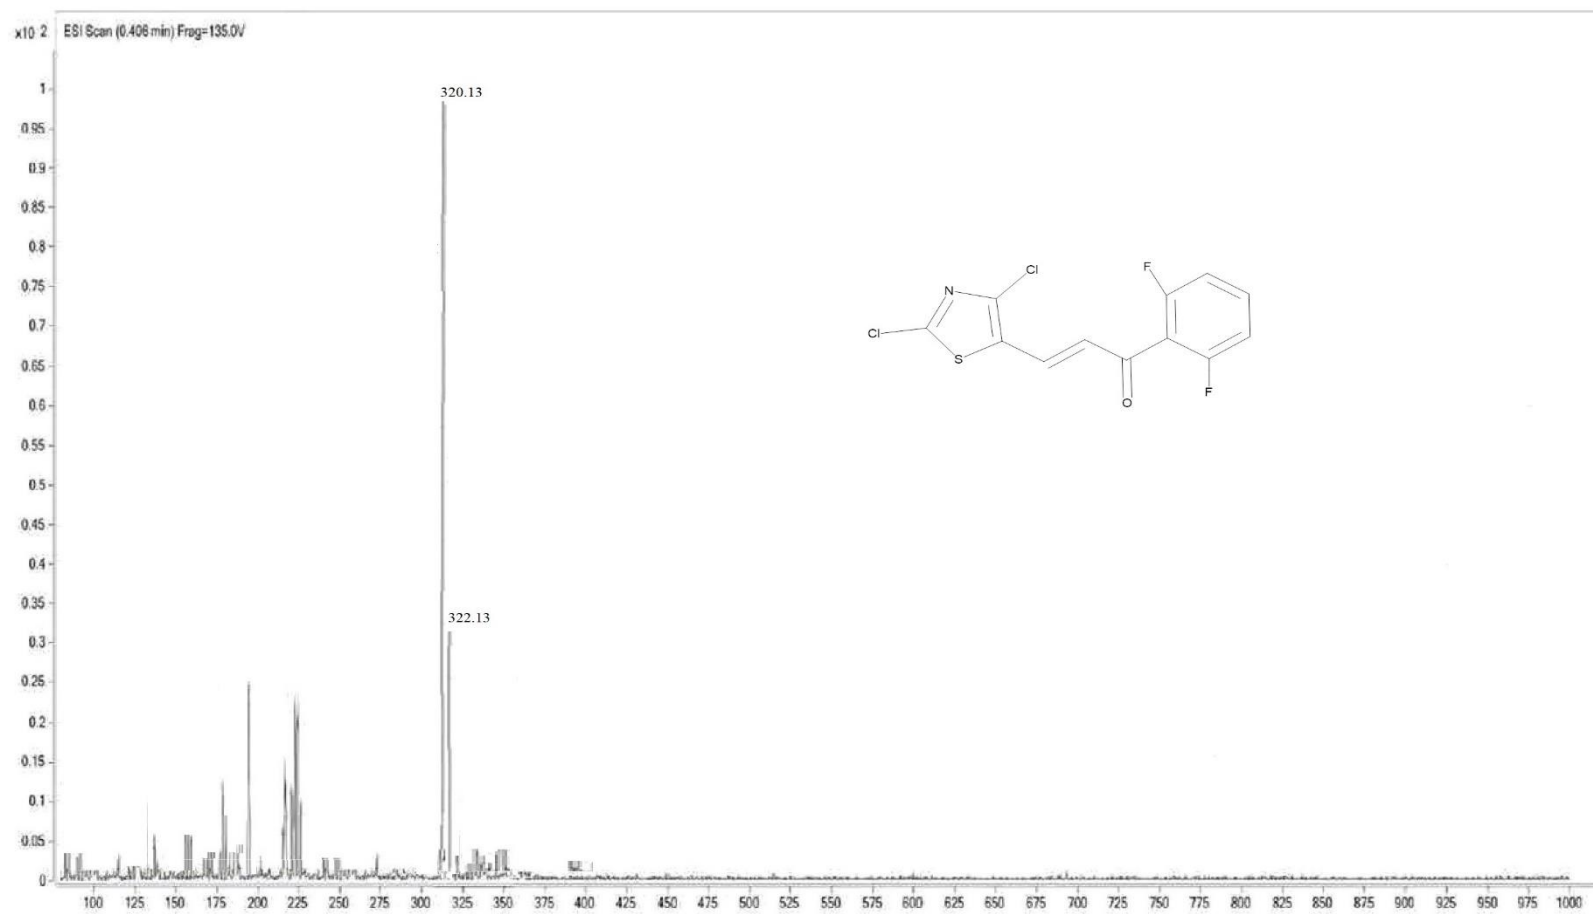

Figure S44. Mass Spectrum of compound 14

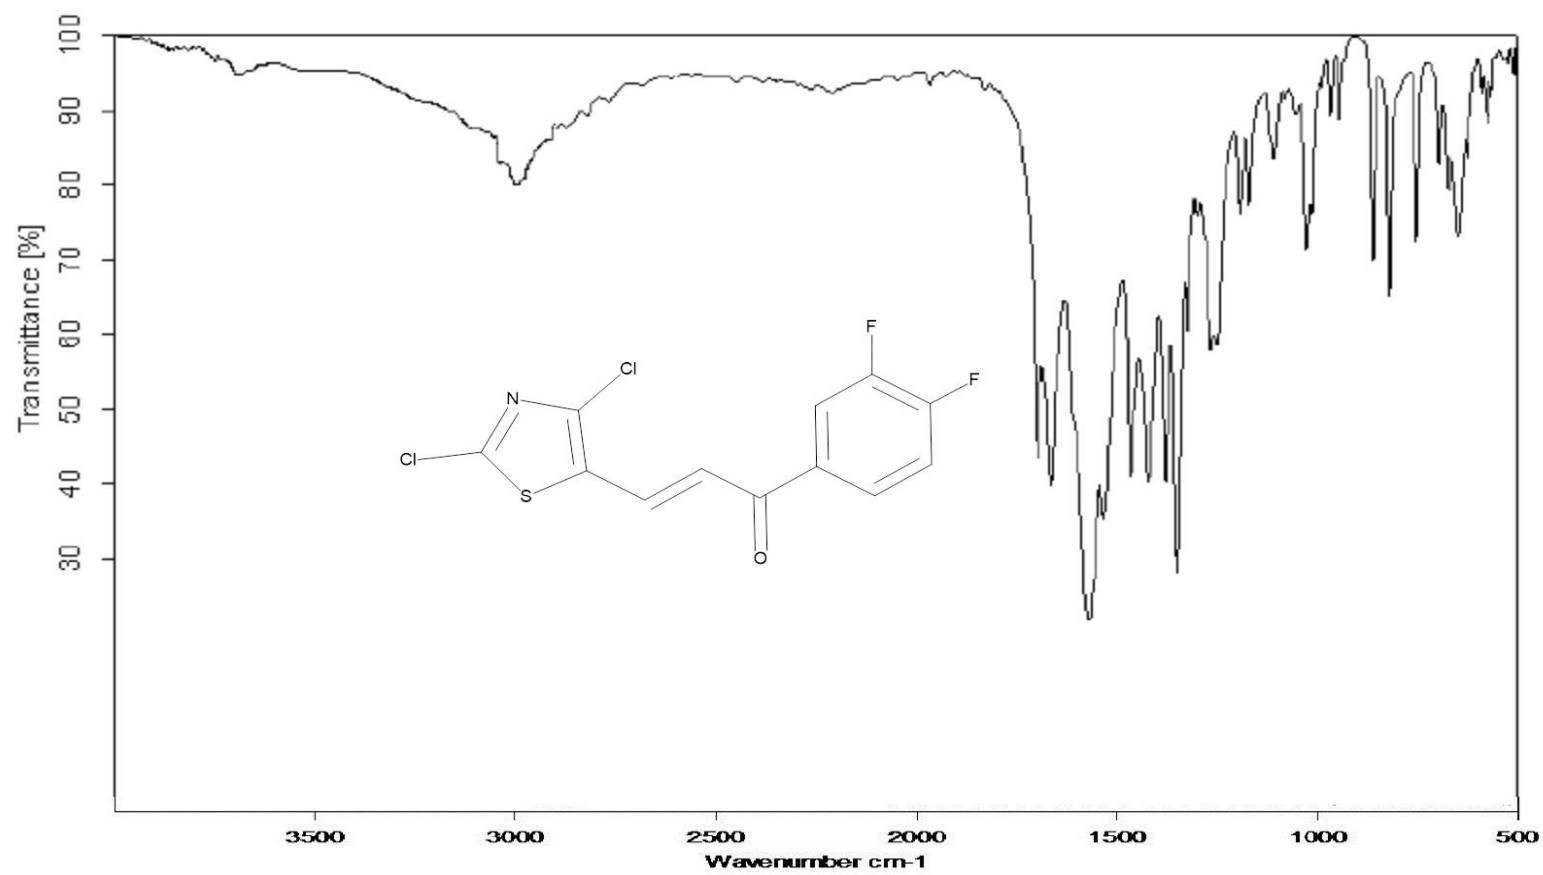

Figure S45. FT-IR Spectrum of compound 15

15 <sup>1</sup>H CDCl<sub>3</sub>

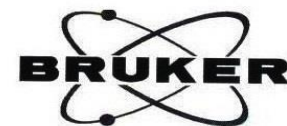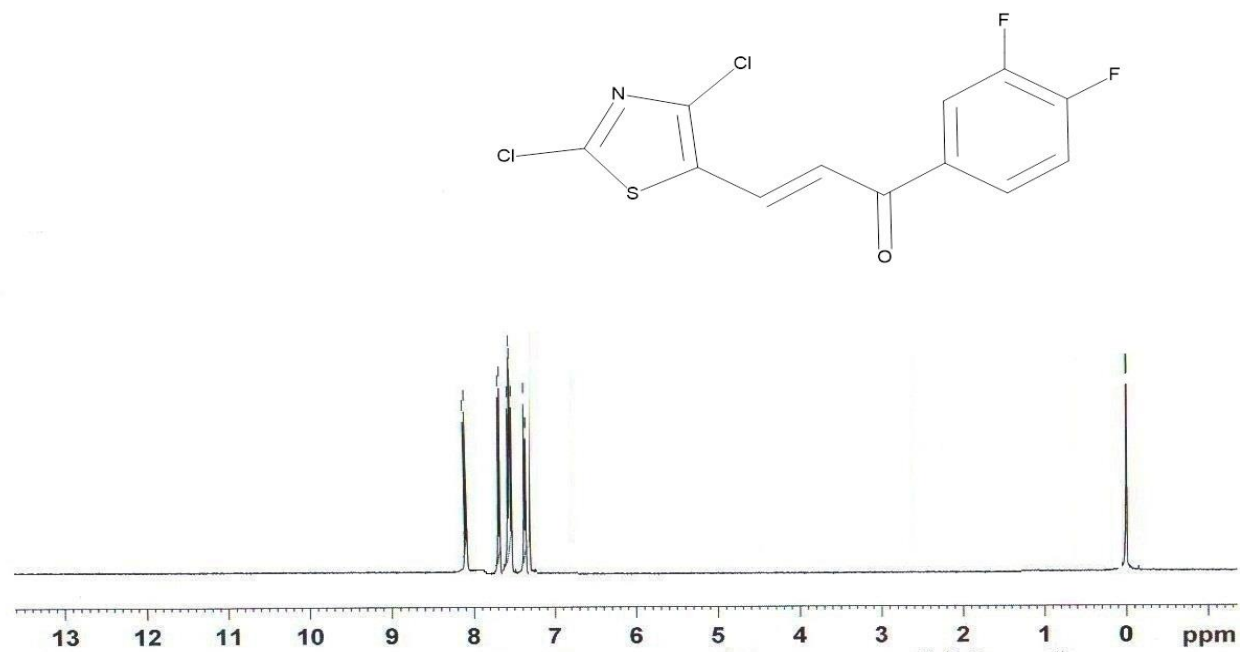

Figure S46. <sup>1</sup>H NMR Spectrum of compound 15

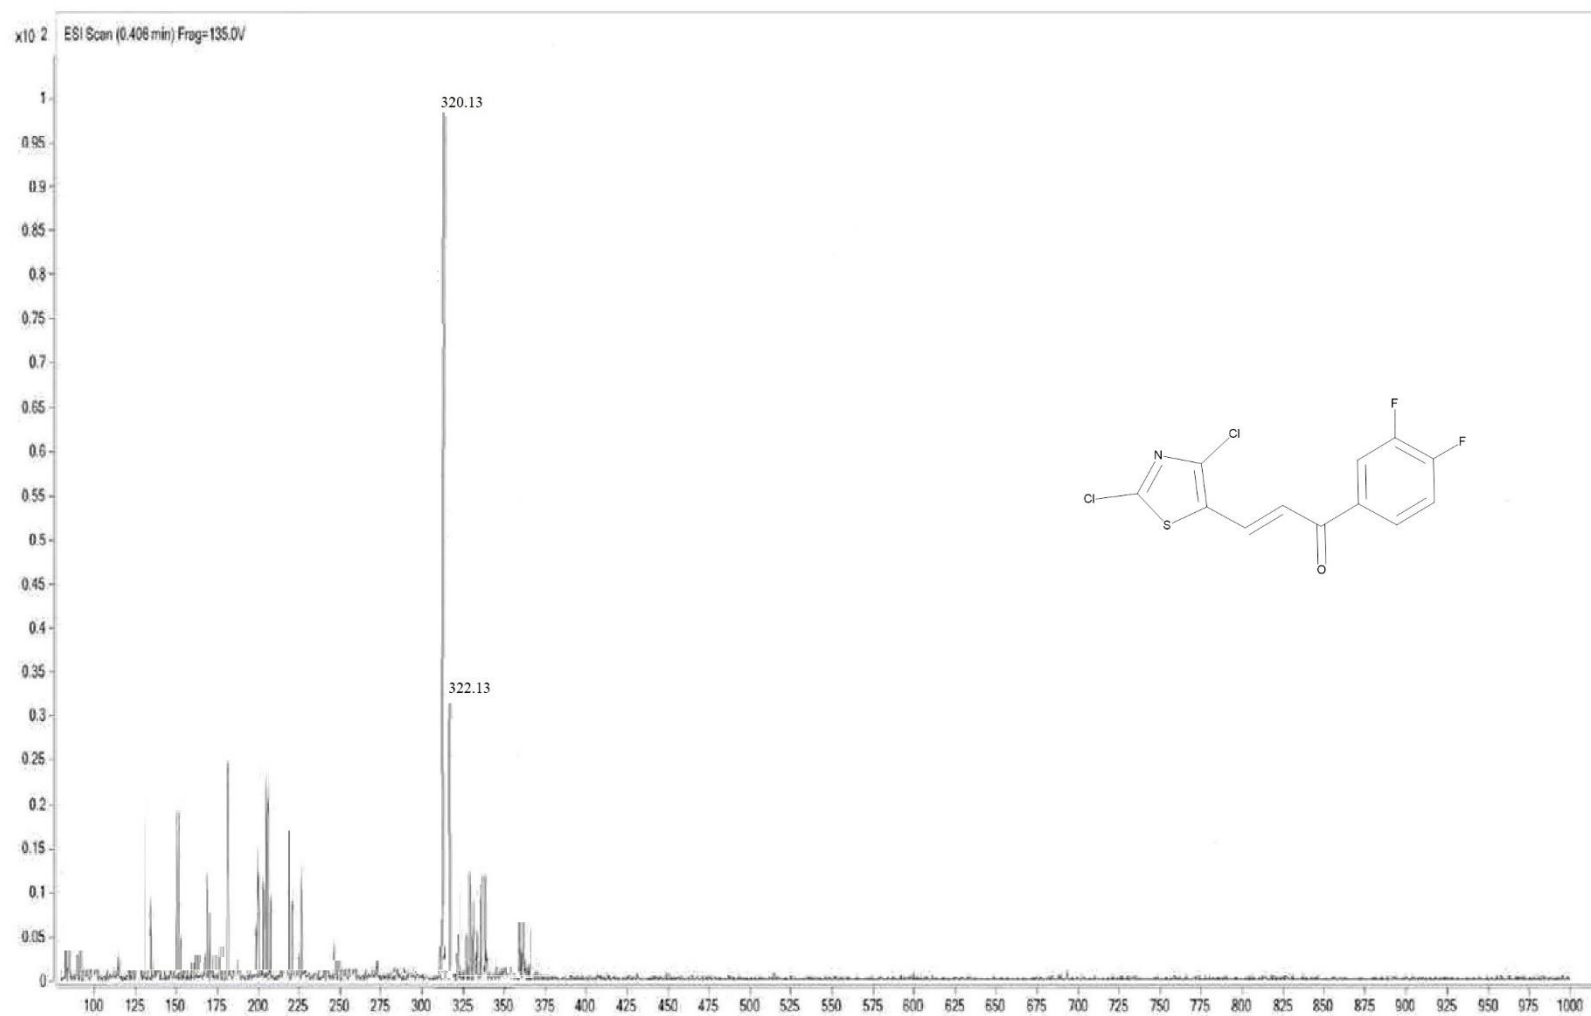

Figure S47. Mass Spectrum of compound 15



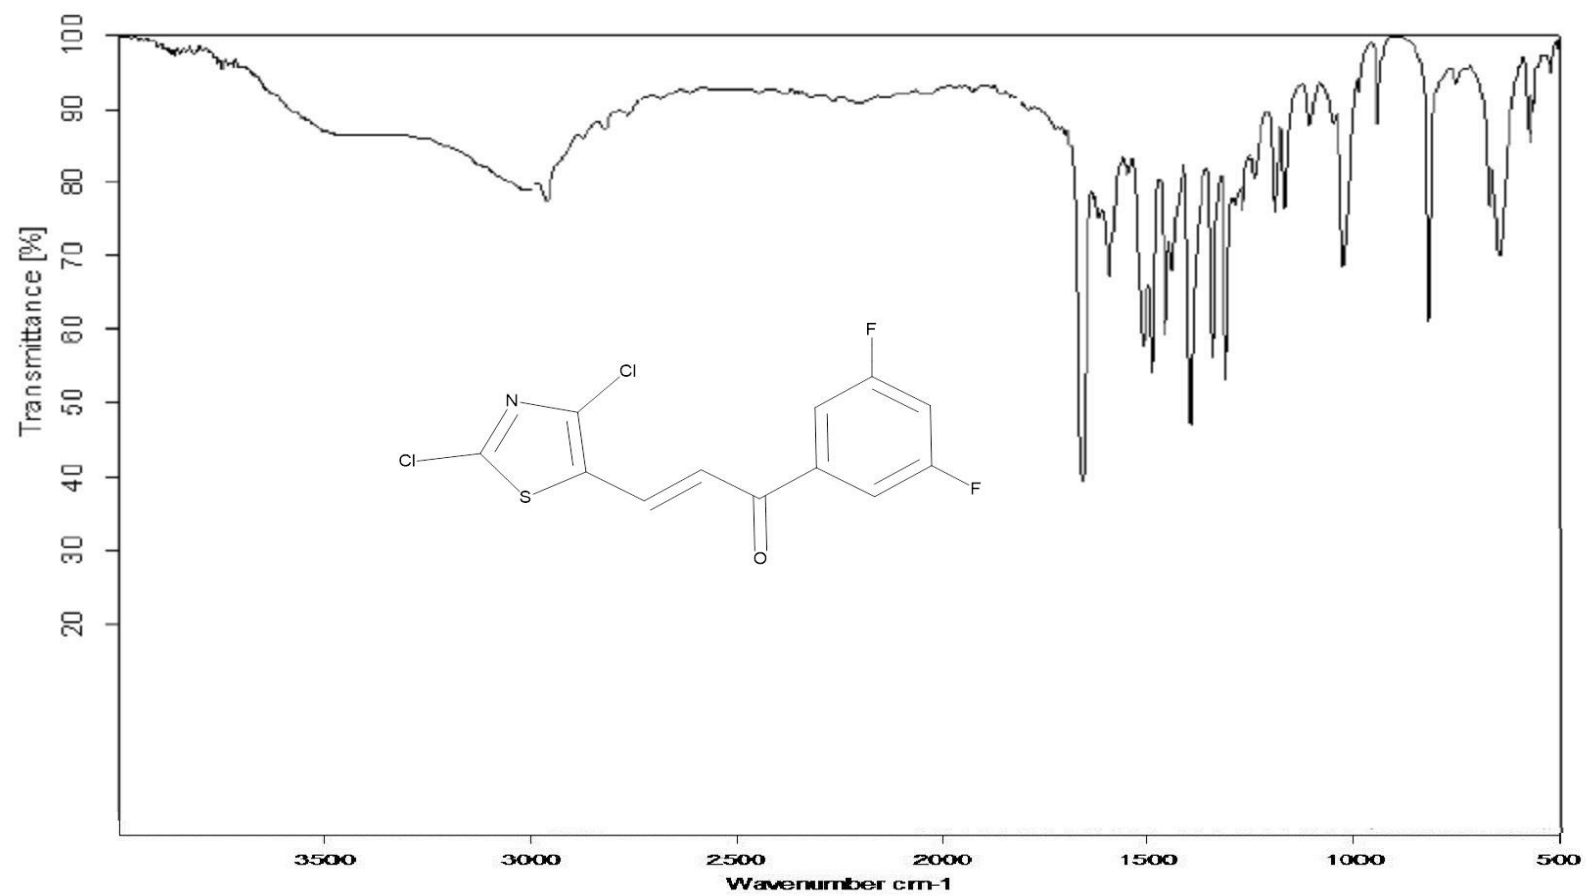

Figure S48. FT-IR Spectrum of compound 16

16 <sup>1</sup>H CDCl<sub>3</sub>

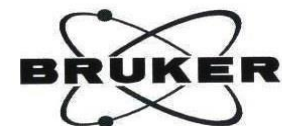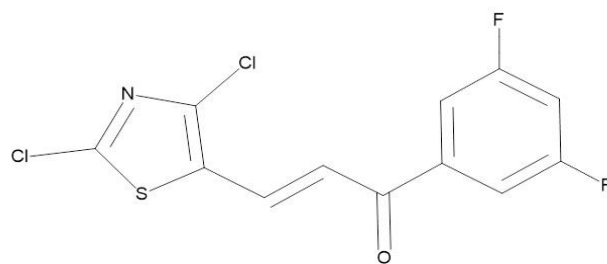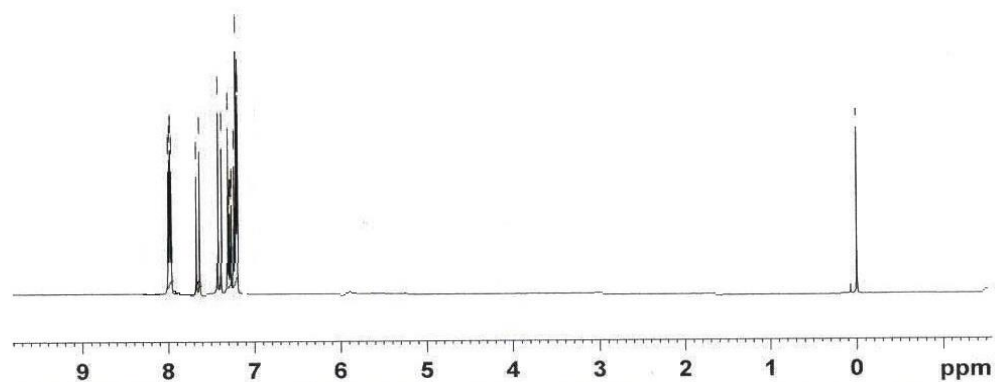

Figure S49. <sup>1</sup>H NMR Spectrum of compound 16

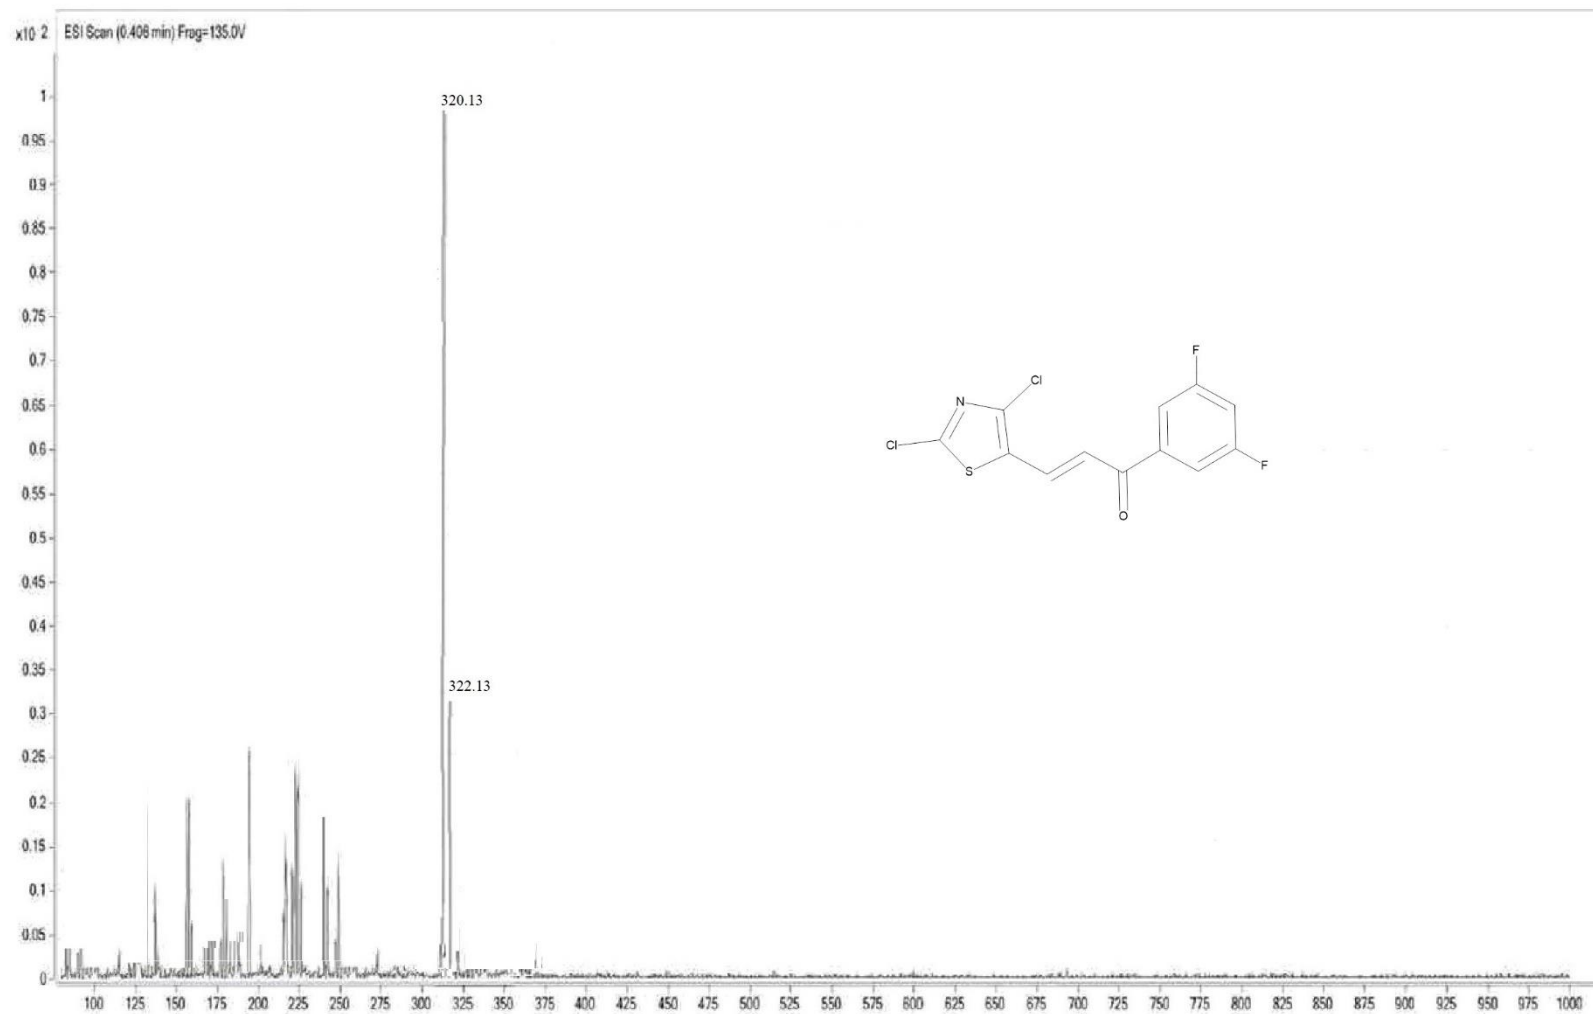

Figure S50. Mass Spectrum of compound 16

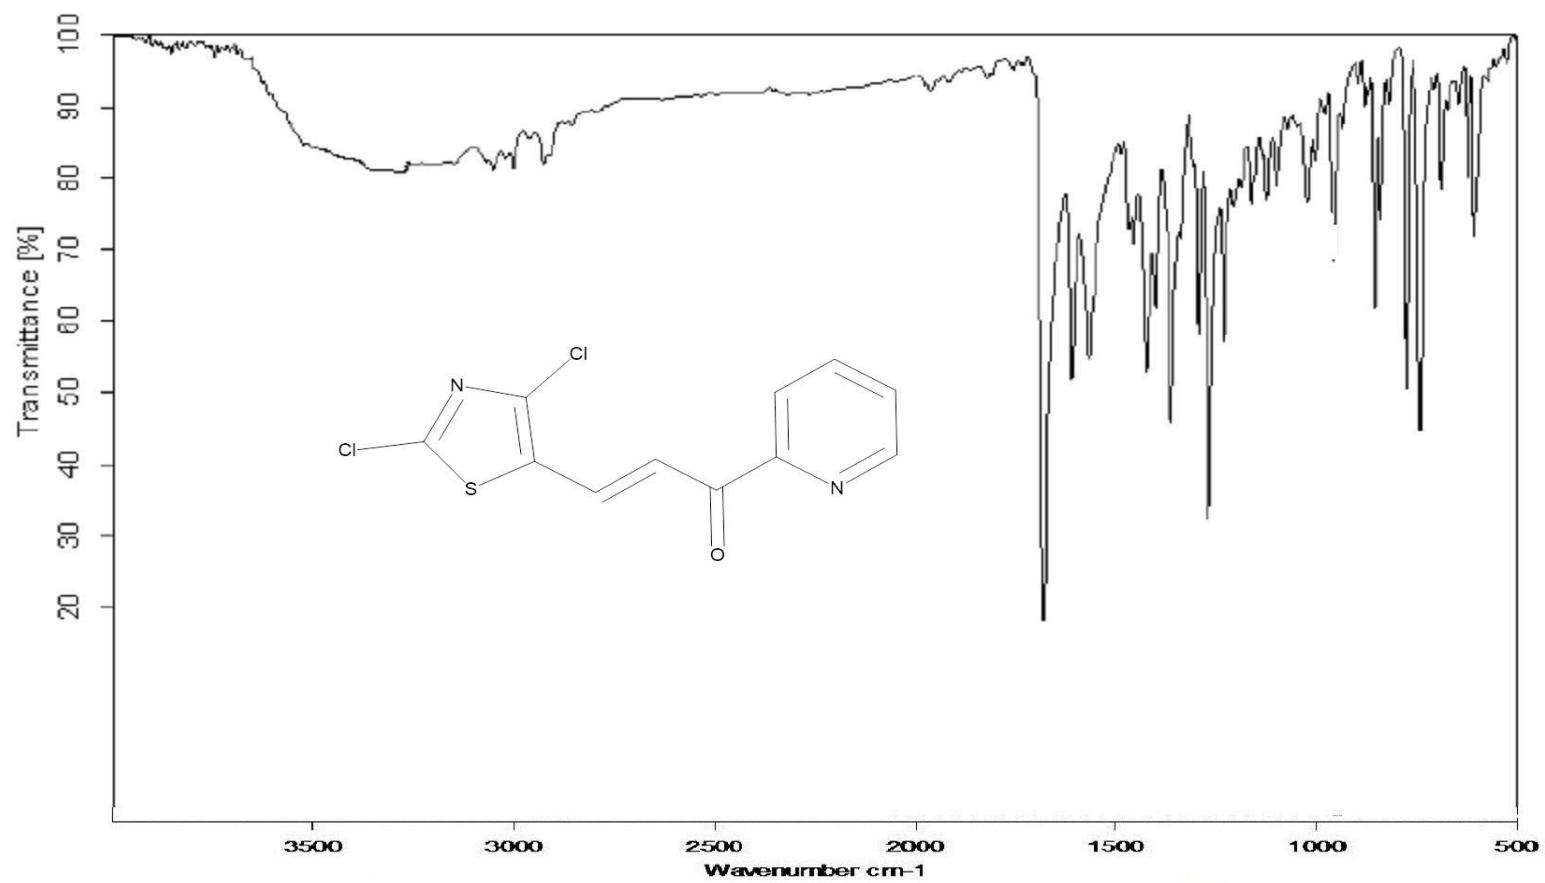

Figure S51. FT-IR Spectrum of compound 17

17 <sup>1</sup>H CDCl<sub>3</sub>

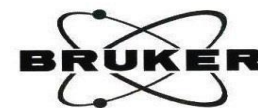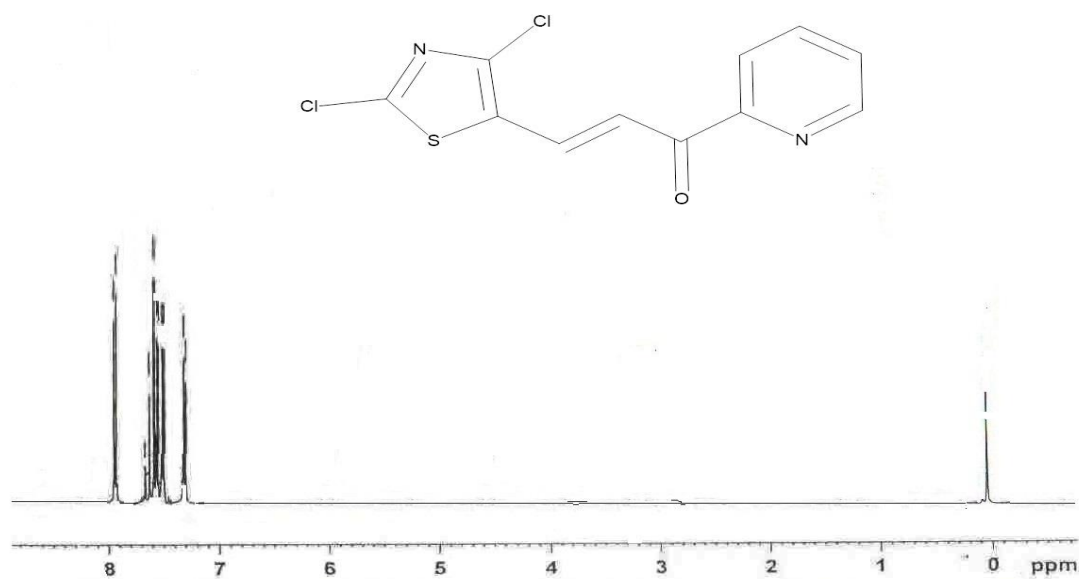

Figure S52. <sup>1</sup>H NMR Spectrum of compound 17

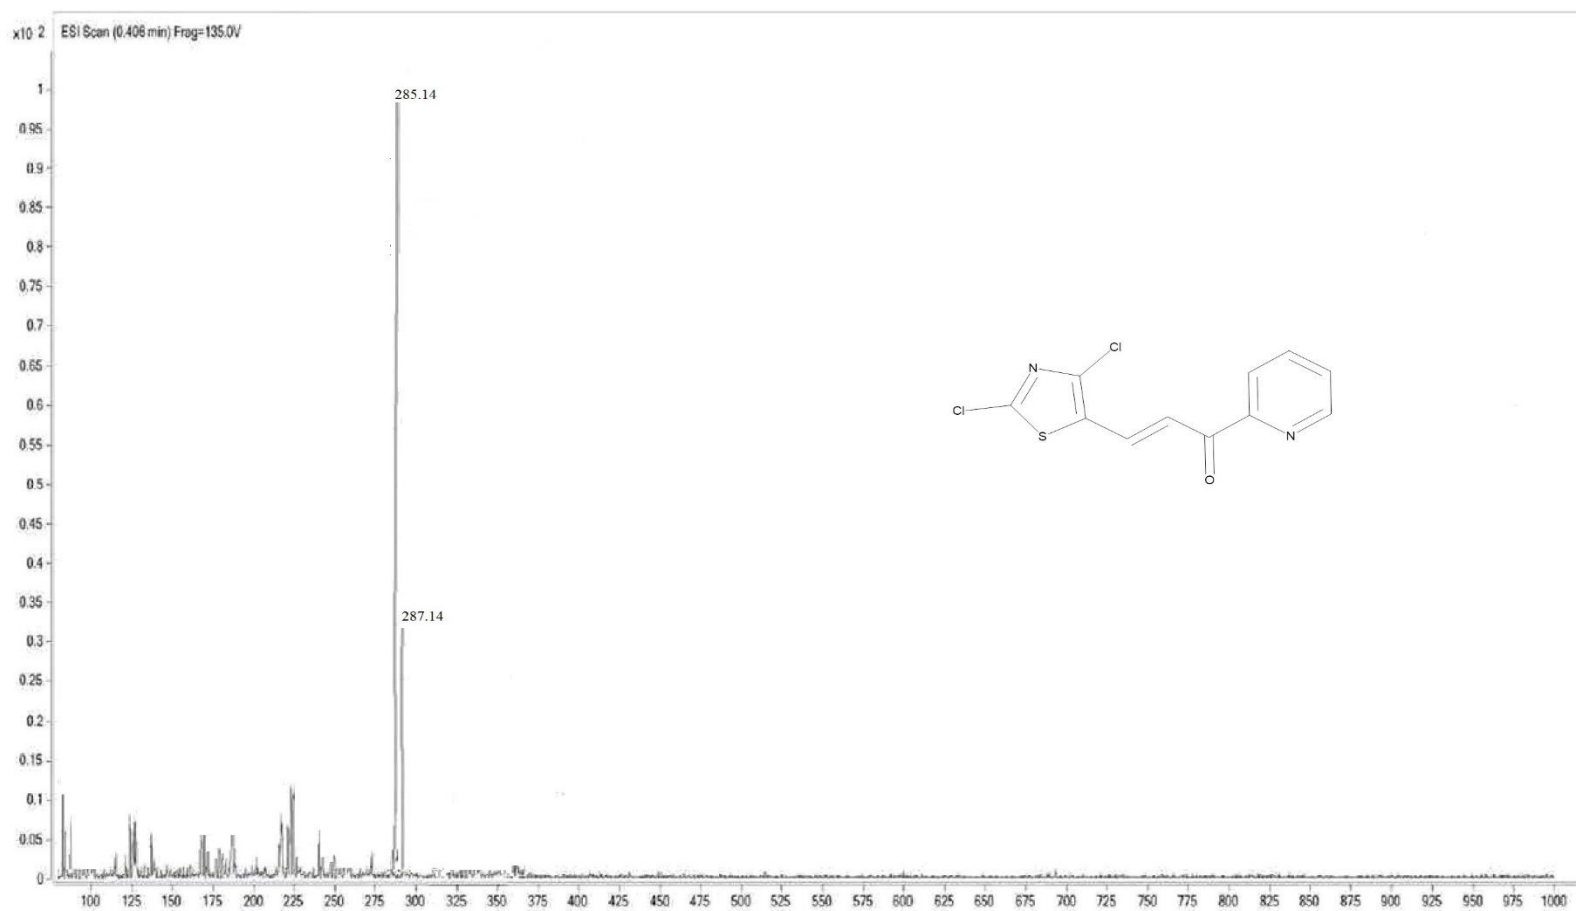

Figure S53. Mass Spectrum of compound 17

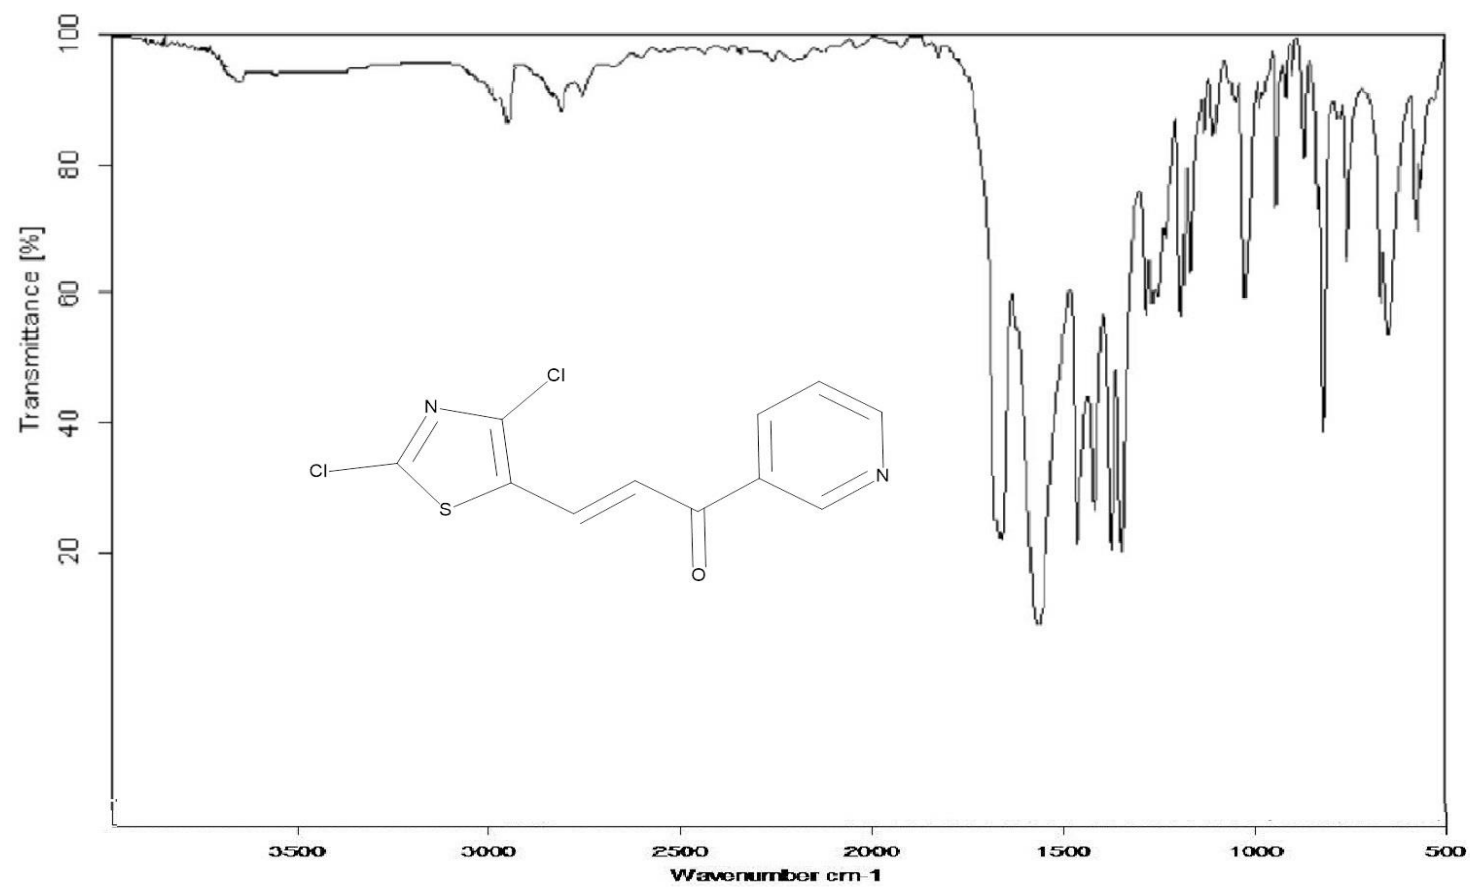

Figure S54. FT-IR Spectrum of compound 18

18 <sup>1</sup>H CDCl<sub>3</sub>

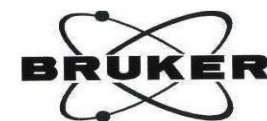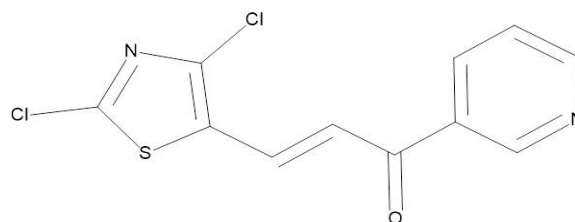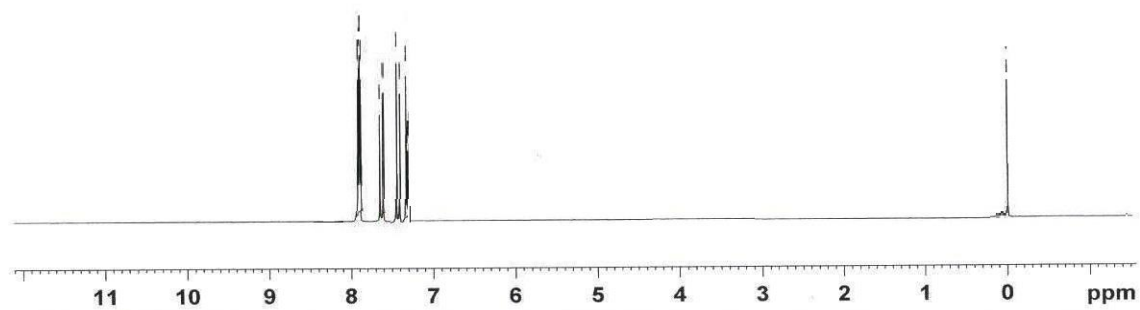

Figure S55. <sup>1</sup>H NMR Spectrum of compound 18



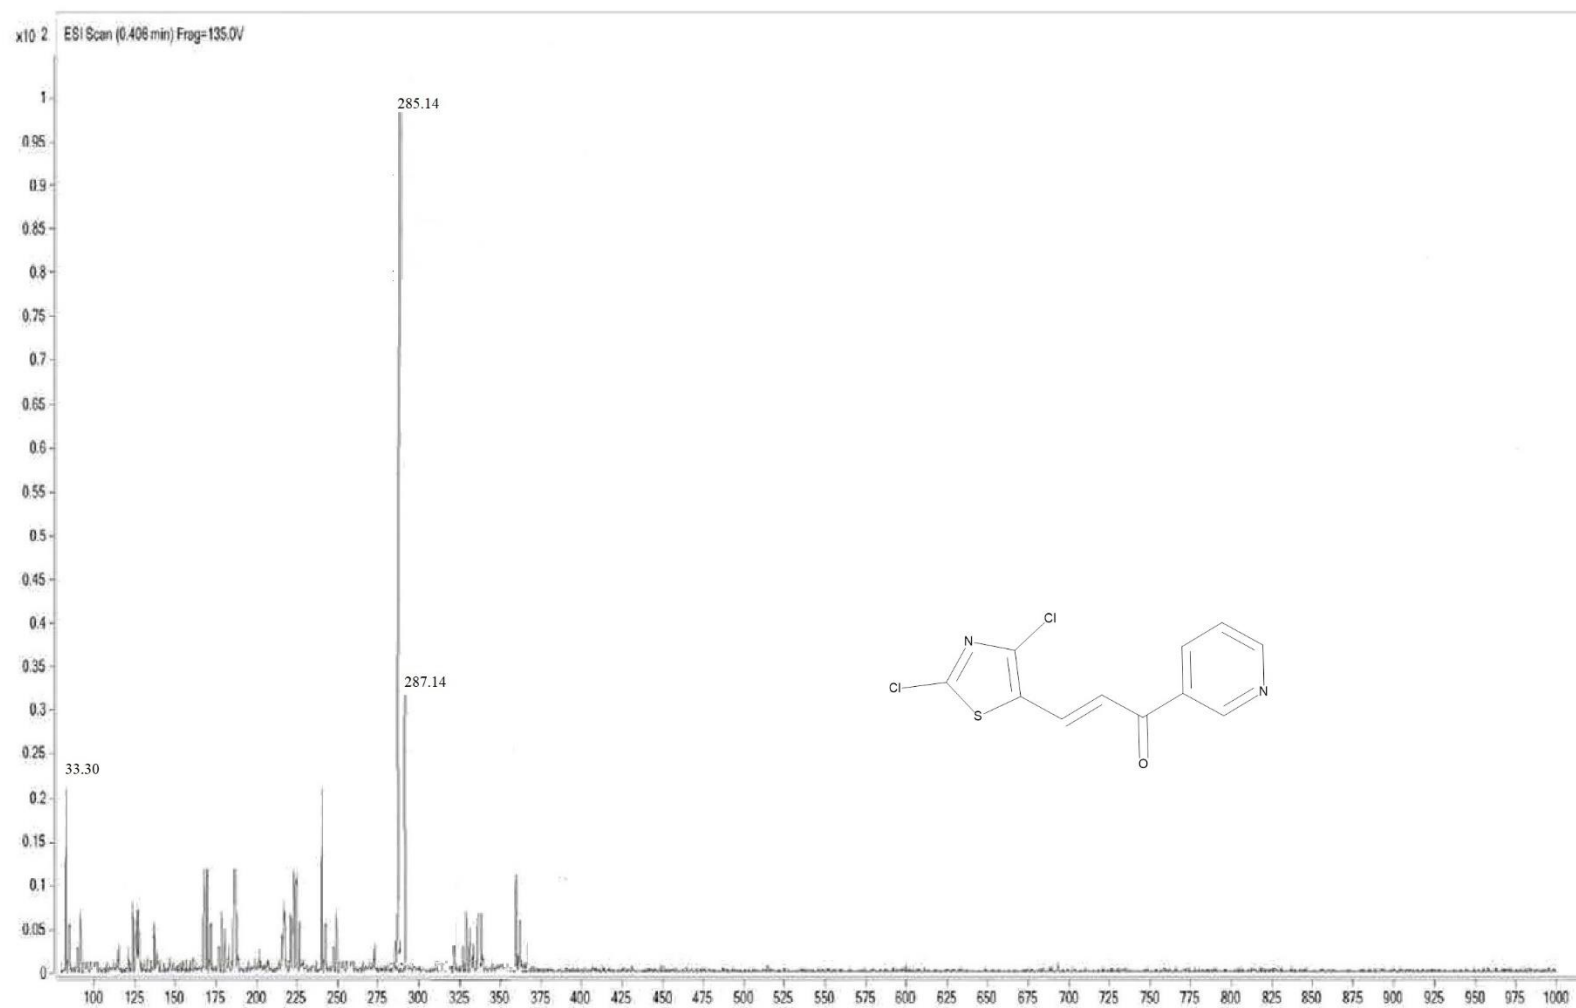

Figure S56. Mass Spectrum of compound 18

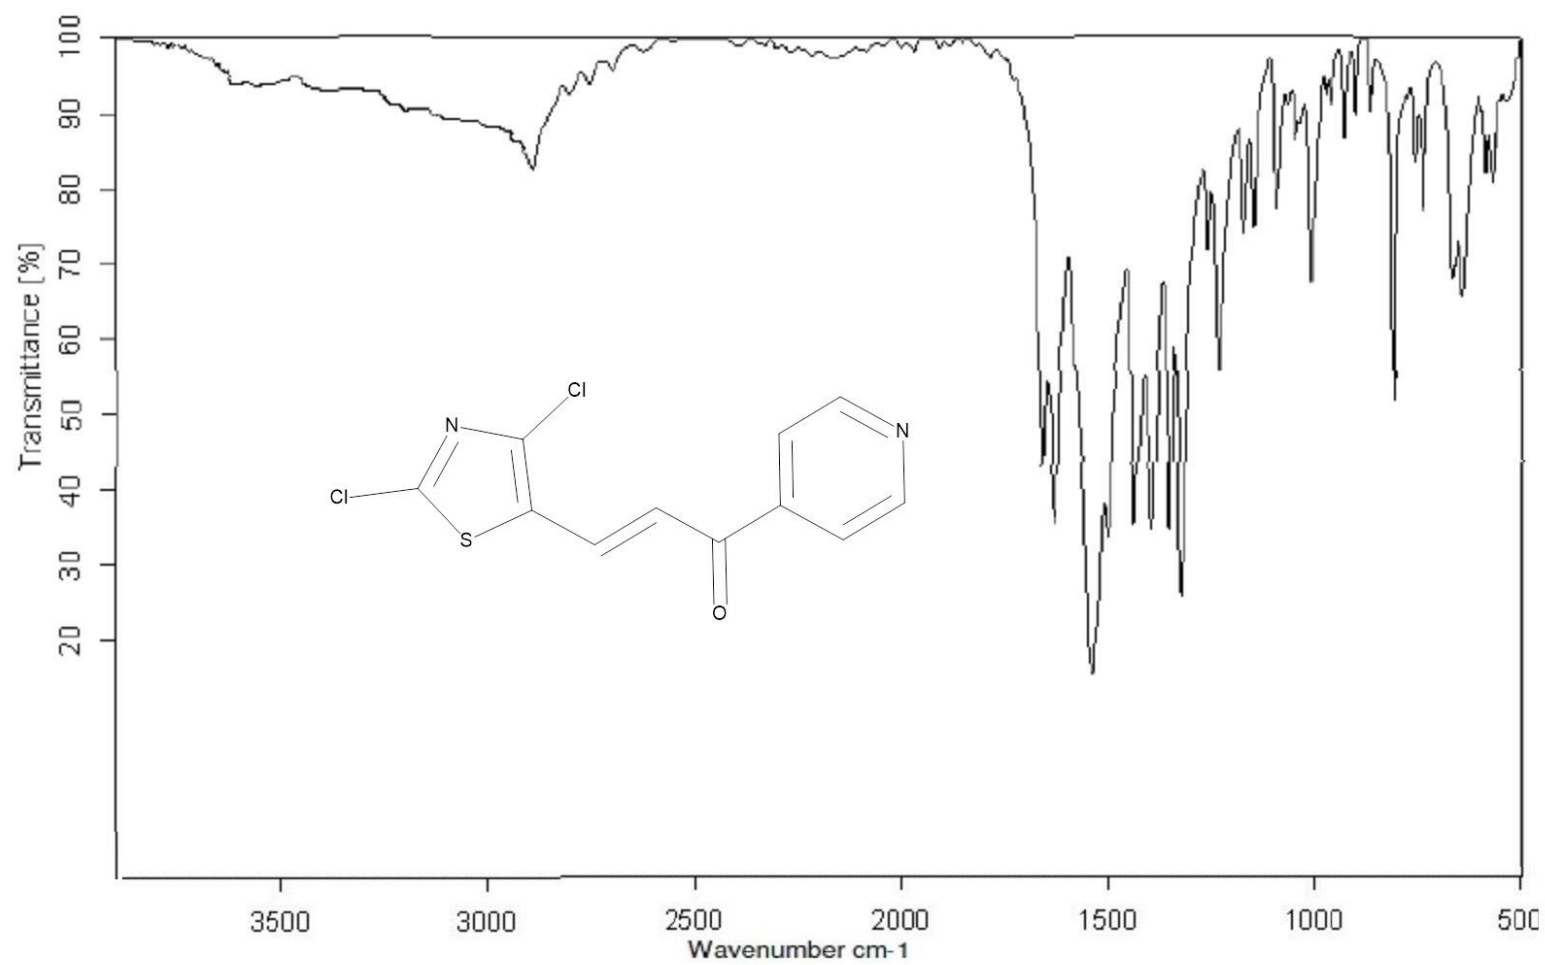

Figure S57. FT-IR Spectrum of compound 19

19 <sup>1</sup>H CDCl<sub>3</sub>

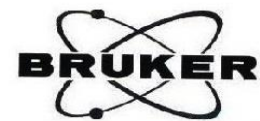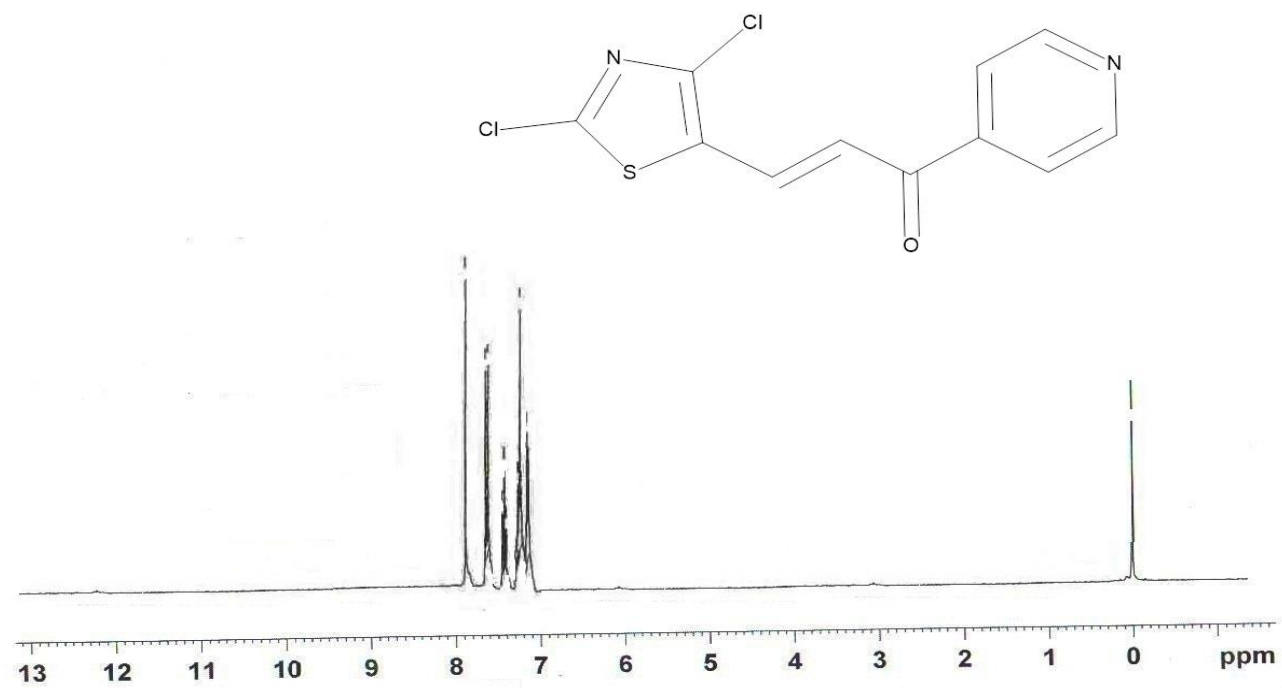

Figure S58. <sup>1</sup>H NMR Spectrum of compound 19

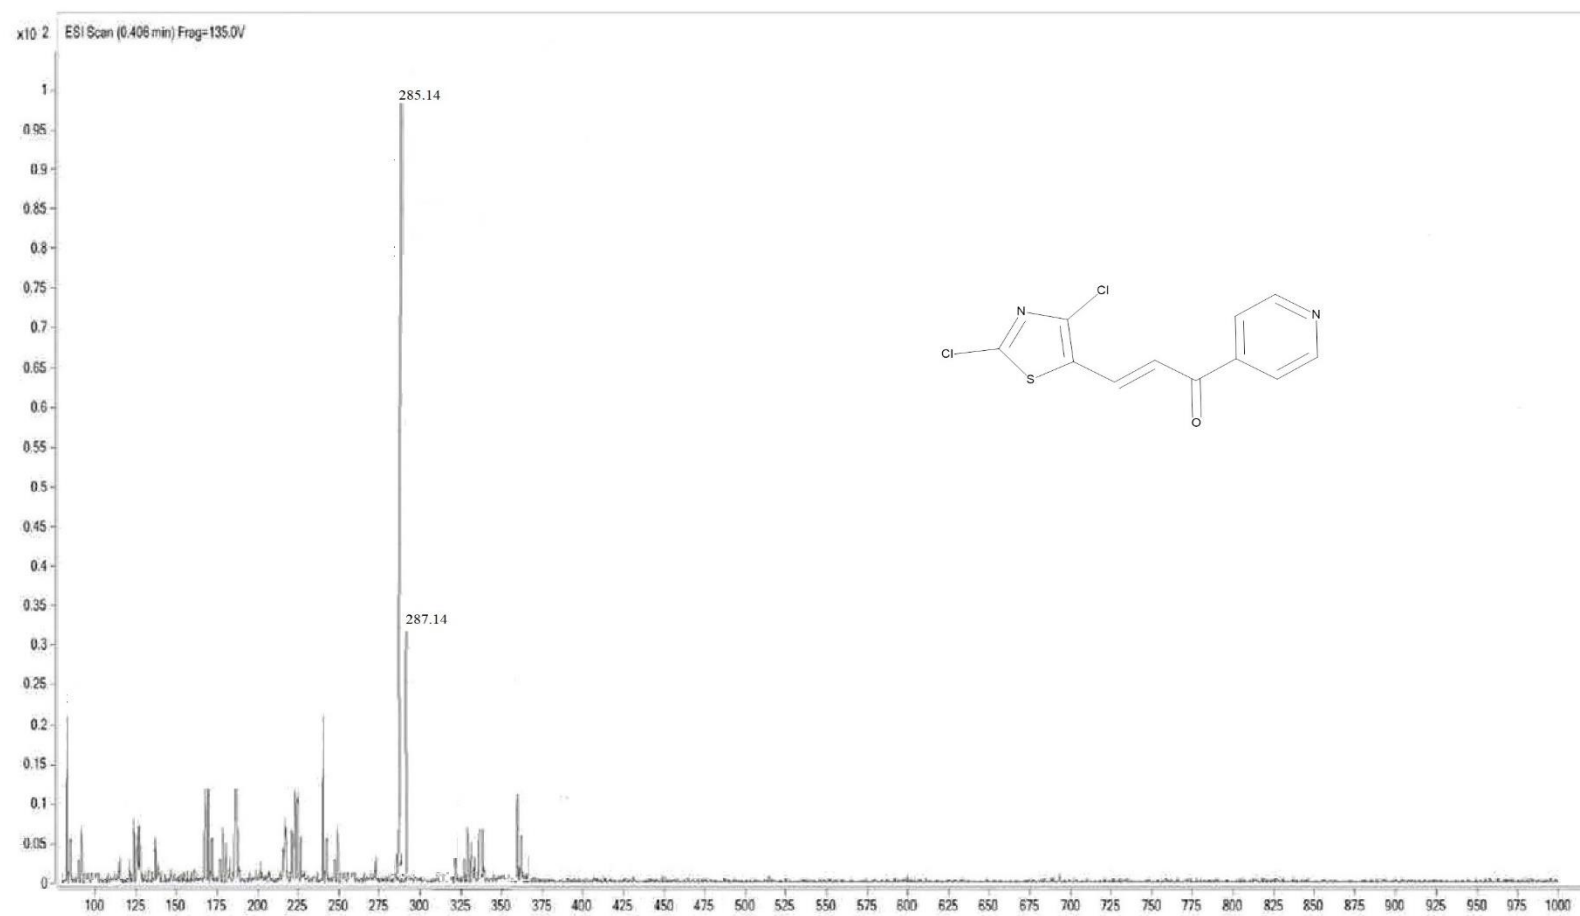

Figure S59. Mass Spectrum of compound 19

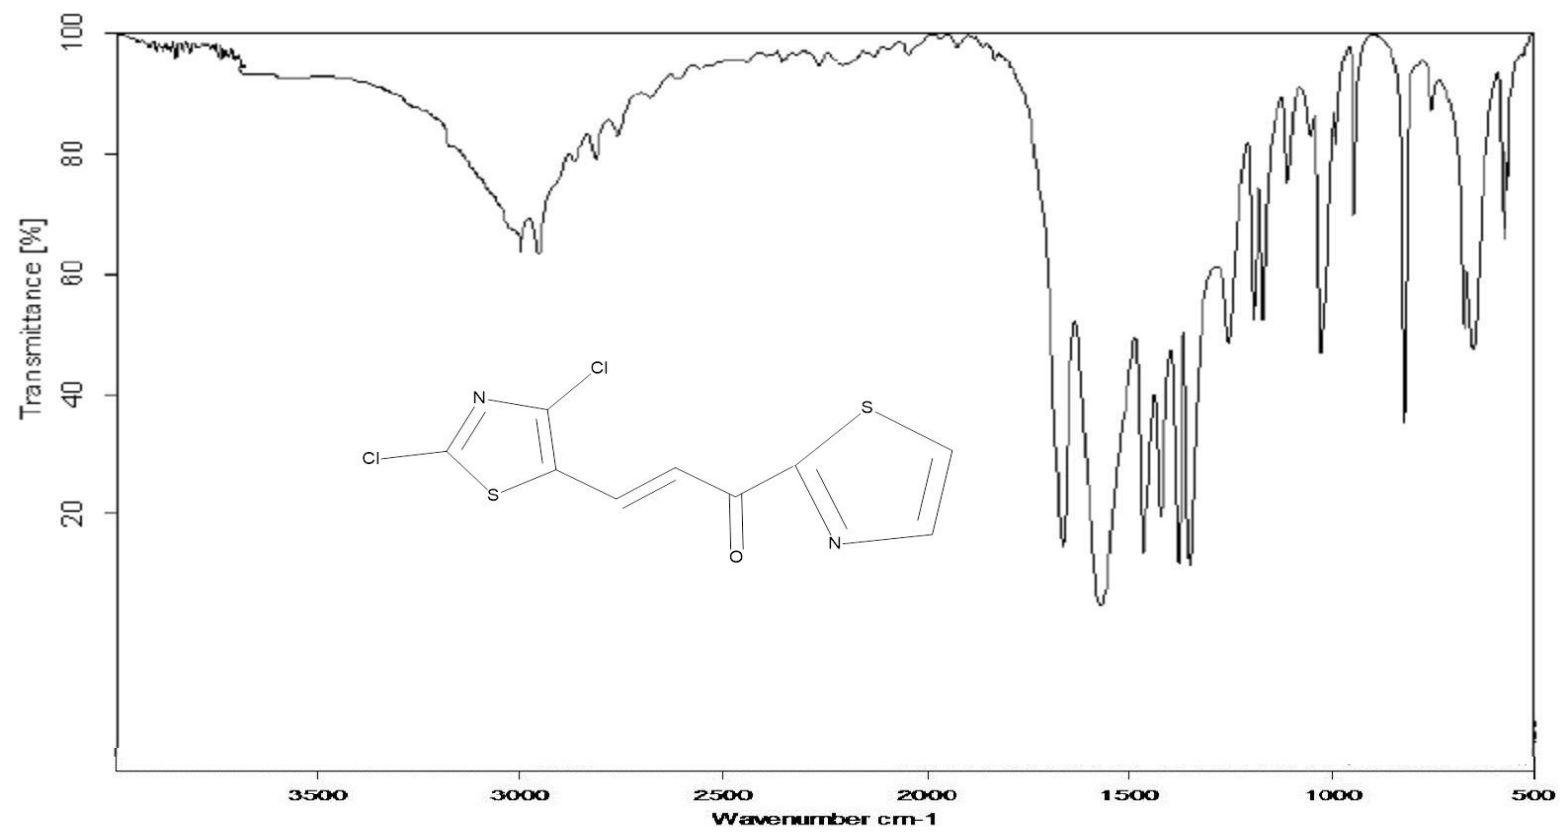

Figure S60. FT-IR Spectrum of compound 20

121H CDCl<sub>3</sub>

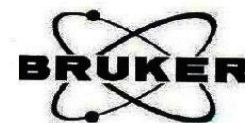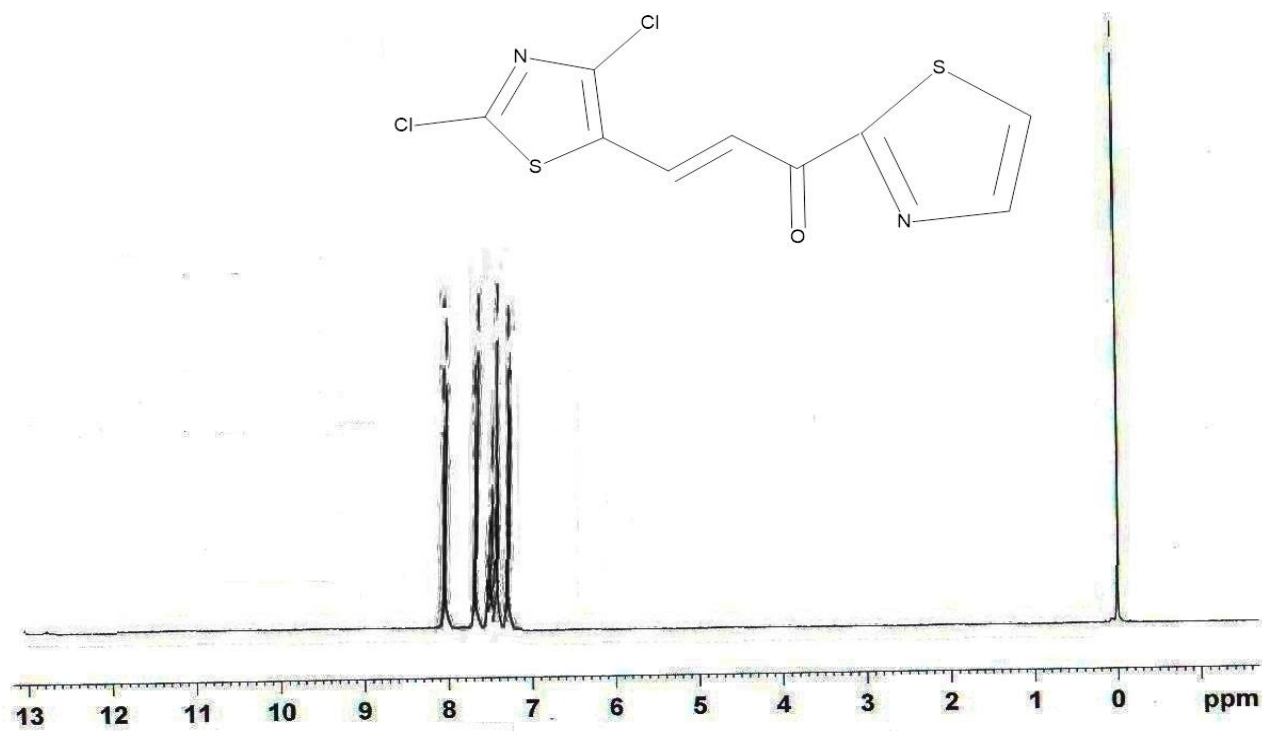

Figure S61. <sup>1</sup>H NMR Spectrum of compound 20

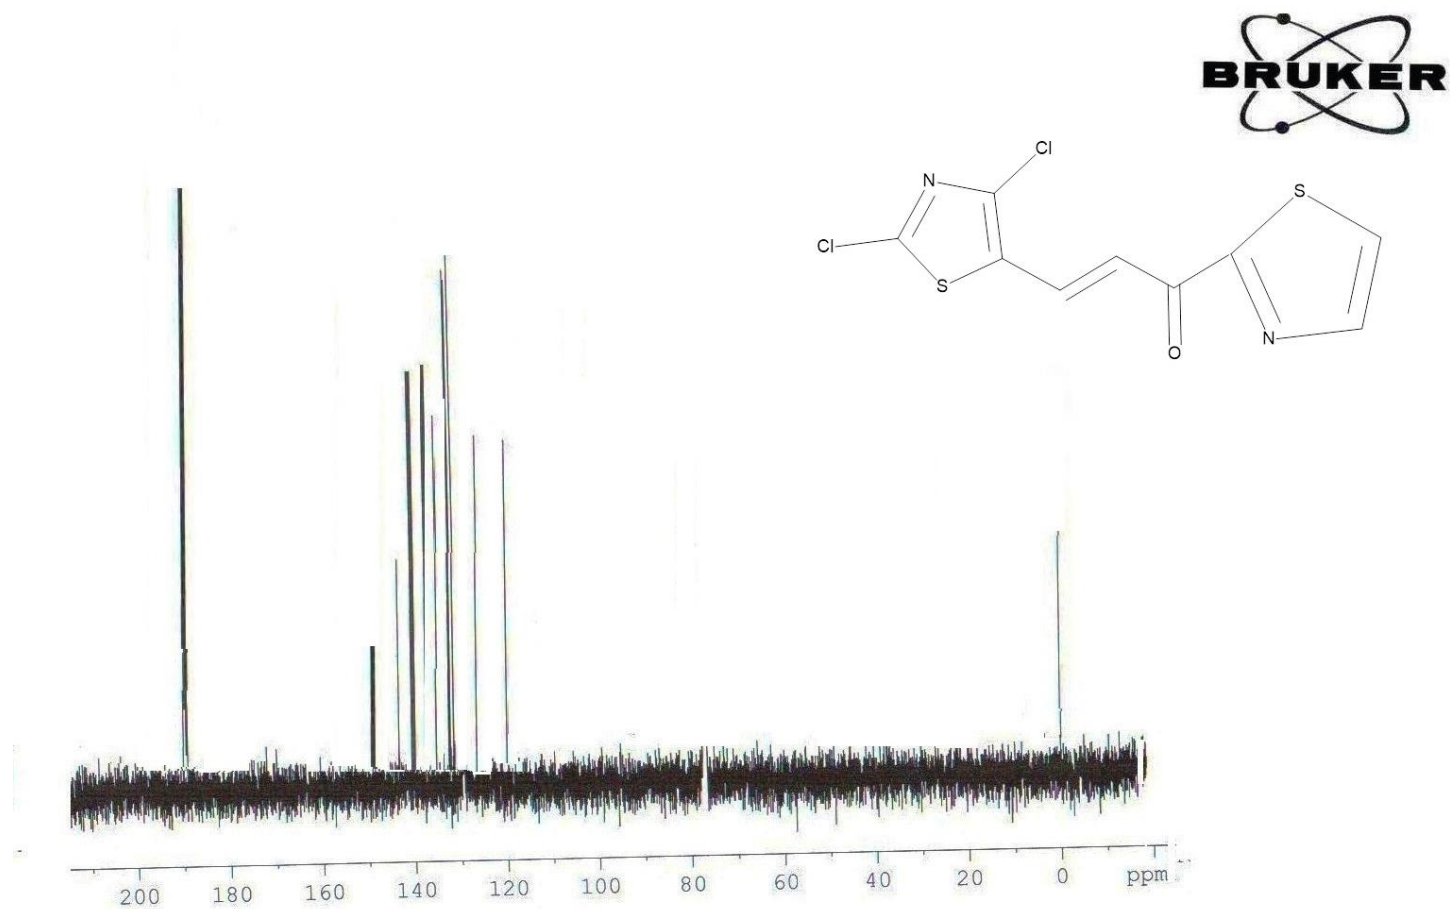

Figure S62.  $^{13}\text{C}$  NMR Spectrum of compound 20

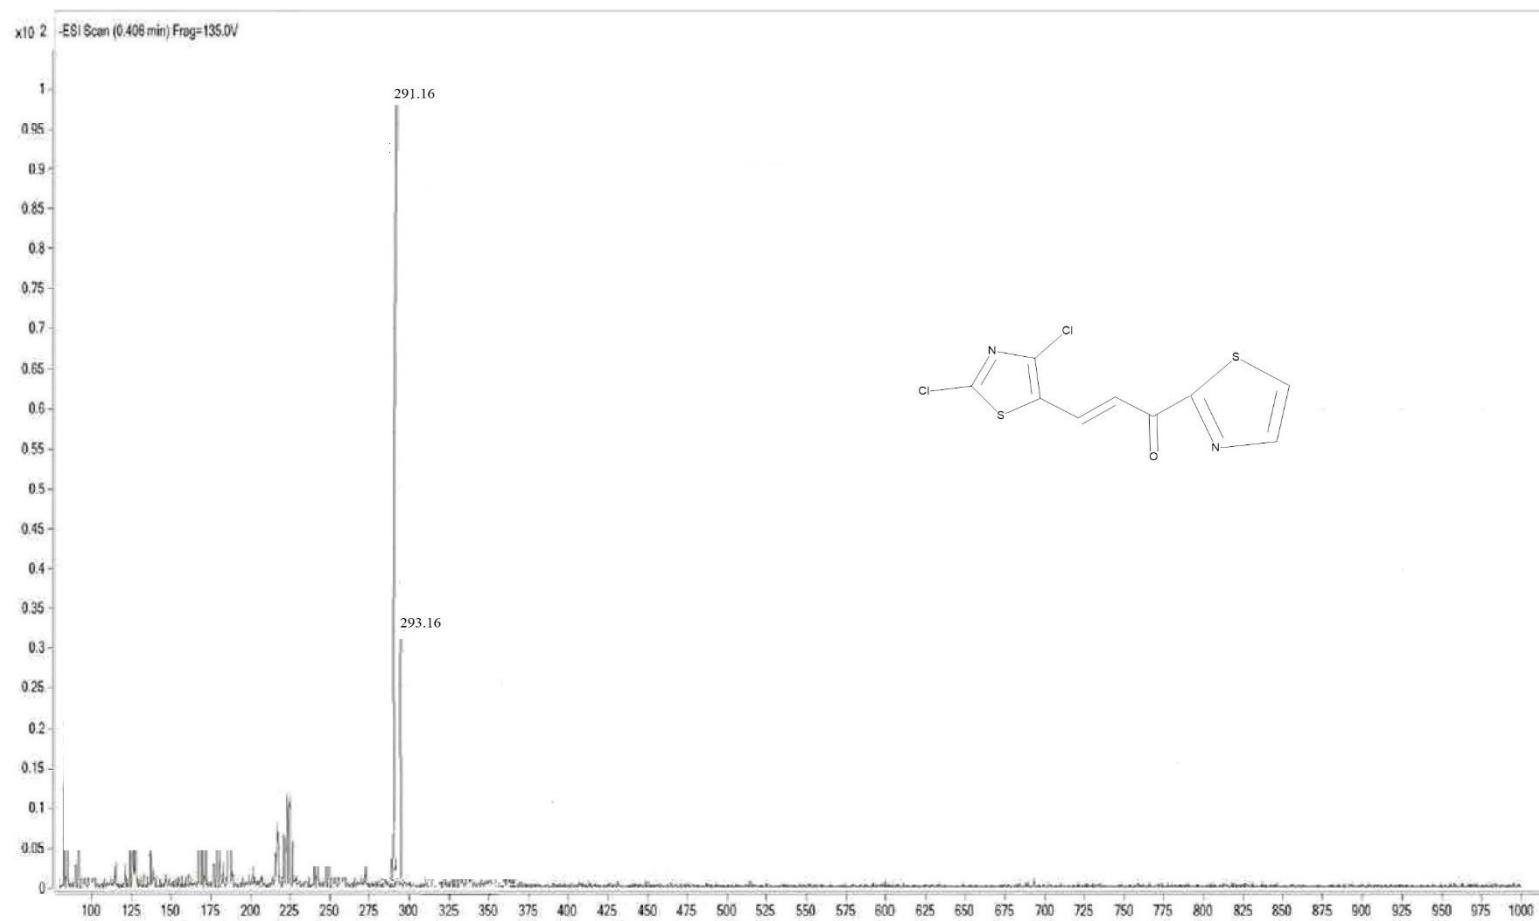

Figure S63. Mass Spectrum of compound 20
